1  
2  
3  
4 **1 Estradiol modulates gut microbiota in female *ob/ob* mice fed a high fat diet**

5  
6 **2 Kalpana D Acharya<sup>1</sup>, Xing Gao<sup>1</sup>, Elizabeth P Bless<sup>1</sup>, Jun Chen<sup>2</sup>, Marc J Tetel<sup>1</sup>**

7  
8 **3**  
9  
10 **4** <sup>1</sup>Neuroscience Program, Wellesley College, Wellesley, MA, 02481 and  
11 **5** <sup>2</sup>Department of Health Sciences Research & Center for Individualized Medicine, Mayo Clinic,  
12 **6** Rochester, MN 55905

13  
14  
15 **7**  
16 **8** Corresponding authors and people to whom reprint requests should be addressed:

17 **9** Kalpana D. Acharya  
18 **10** Neuroscience Program  
19 **11** Wellesley College  
20 **12** 106 Central Street  
21 **13** Wellesley, MA 02481  
22 **14** Telephone: 781 283-3081  
23 **15** Fax number: 781 283-3642  
24 **16** [kacharya@wellesley.edu](mailto:kacharya@wellesley.edu)

25  
26  
27  
28  
29  
30 **19 Abstract**

31  
32 **20** Estrogens protect against diet-induced obesity in females. For example, loss of estrogens in  
33 **21** postmenopausal women is associated with an increased risk of weight gain. Furthermore,  
34 **22** ovariectomized rodents on a high-fat diet (HFD) become obese, which can be prevented by  
35 **23** estrogen treatment. Estrogens act with other hormones, including leptin, to regulate energy  
36 **24** homeostasis in females. Leptin, a hormone encoded by the *ob* gene, is produced by adipocytes  
37 **25** and acts in brain to signal satiety. Leptin-deficient mice (*ob/ob*) exhibit morbid obesity and  
38 **26** insulin resistance. In addition to estrogens and leptin, the gut microbiome (gut microbes and  
39 **27** their metabolites), is critical in regulating metabolism. The present study investigates whether  
40 **28** estrogens and leptin modulate gut microbiota in ovariectomized *ob/ob* (obese) or heterozygote  
41 **29** (Het; lean) control mice fed a HFD that received either 17 $\beta$ -Estradiol or vehicle implants. E2  
42 **30** attenuated weight gain in both genotypes compared to their vehicle counterparts. Moreover,  
43 **31** both obesity (in *ob/ob* mice) and E2 reduced gut microbial alpha diversity. *ob/ob* mice exhibited  
44 **32** lower species richness than control mice, while E2-treated mice had reduced evenness compared  
45 **33** to vehicle mice. At the taxa level, E2 treatment was associated with higher abundances of the  
46 **34** *S24-7* family. Leptin was associated with higher abundances of *Coriobacteriaceae* and the  
47 **35** *Clostridium* and *Lactobacillus* spp. The present findings suggest that E2 and leptin profoundly

1  
2  
3  
4 1 alter the gut microbiota of HFD-fed female mice. Understanding the role of E2 and leptin in  
5  
6 2 modulating gut microbiota will allow the development of therapeutic options targeting the gut  
7  
8 3 microbiome for hormone-dependent metabolic disorders in women.  
9

10 4  
11 5 *Keywords:* Estrogen, microbiome, obesity, leptin, diabetes, insulin resistance  
12  
13 6

## 14 7 **Introduction**

15 8 Estrogens profoundly influence energy homeostasis<sup>1-3</sup>, as well as reproductive physiology and  
16  
17 9 behavior<sup>4-6</sup>. Estrogens reduce food intake, prevent body weight gain and adiposity, and increase  
18  
19 10 physical activity in both humans and rodents<sup>1,2</sup>. Postmenopausal women have lower levels of  
20  
21 11 circulating estrogens and an increased tendency to gain fat weight, which increases their risk for  
22  
23 12 obesity, cardiovascular disease, stroke, and type 2 diabetes<sup>7-9</sup>. In support of the anorectic effects  
24  
25 13 of estrogens, ovariectomized mice display increased energy intake and become obese when fed a  
26  
27 14 HFD, while E2 treatment prevents weight gain<sup>2,10-13</sup>, indicating that E2 protects against HFD-  
28  
29 15 induced obesity.  
30

31 16  
32 17 Leptin is a peptide hormone secreted primarily by adipocytes, which acts in the brain to stimulate  
33  
34 18 metabolism, promote satiety, and regulate fat storage<sup>14-16</sup>. A mutation in the *ob* gene that  
35  
36 19 encodes leptin results in mice lacking the hormone (*ob/ob*)<sup>17</sup>. While phenotypically normal at  
37  
38 20 birth, *ob/ob* mice quickly develop obesity and diabetes<sup>18</sup>. Additionally, *ob/ob* mice exhibit  
39  
40 21 increased food intake and decreased physical activity, energy metabolism, and body temperature  
41  
42 22 compared to lean controls, making *ob/ob* mice an excellent genetic model of obesity<sup>19-21</sup>.  
43  
44 23 Administering leptin to adult *ob/ob* mice reverses these effects by decreasing food intake,  
45  
46 24 increasing energy output and decreasing circulating levels of glucose and insulin<sup>22,23</sup>.  
47  
48 25

49 26 Leptin and estrogen signaling pathways interact to influence reproduction and energy  
50  
51 27 metabolism. High levels of E2 are associated with increased leptin sensitivity in both male and  
52  
53 28 female rodents<sup>24</sup>. In mice, ovariectomy decreases leptin sensitivity, but can be restored by E2  
54  
55 29 administration<sup>25</sup>. While female *ob/ob* mice do not have an estrous cycle, leptin administration  
56  
57 30 restores fertility, including successful ovulation, pregnancy, and birth, indicating the profound  
58  
59 31 effects of leptin on reproduction<sup>26</sup>. While these findings indicate functional interactions  
60  
61  
62  
63  
64  
65

1  
2  
3  
4  
5  
6  
7  
8  
9  
10  
11  
12  
13  
14  
15  
16  
17  
18  
19  
20  
21  
22  
23  
24  
25  
26  
27  
28  
29  
30  
31  
32  
33  
34  
35  
36  
37  
38  
39  
40  
41  
42  
43  
44  
45  
46  
47  
48  
49  
50  
51  
52  
53  
54  
55  
56  
57  
58  
59  
60  
61  
62  
63  
64  
65

1 between E2 and leptin, mechanisms by which these hormones interact to regulate energy  
2 metabolism are not well understood.

3  
4 The gut microbiome, which is composed primarily of the bacteria in the intestinal tract and their  
5 genomes (collectively referred to as gut microbiota) and metabolites, has profound effects on  
6 energy metabolism<sup>27</sup>. Changes in body weight have been associated with changes in gut  
7 microbiota diversity in humans and rodents<sup>28</sup>. For example, the transfer of gut microbiota from  
8 obese human donors results in an obese phenotype in recipient mice<sup>29,30</sup>. The gut microbiome  
9 aids in digestion and absorption of macro- and micro-nutrients from food<sup>31</sup>. Gut microbiota are  
10 also essential modulators of host immune homeostasis. Protective polysaccharides produced  
11 from the break-down of dietary fibers attenuate infection and inflammation<sup>32,33</sup>. Finally, gut  
12 microbiota can synthesize and metabolize neurotransmitters and hormones to alter host  
13 physiology<sup>34-36</sup>.

14  
15 A variety of factors, including host genetics, diet, and stress can alter the gut microbiome<sup>35-39</sup>.  
16 There is mounting evidence that gonadal hormones influence gut microbiota<sup>36</sup>. Sex differences  
17 in gut microbiota have been reported in humans and rodents<sup>40</sup>. In a European population, higher  
18 levels of *Bacteroidetes* and *Prevotella* were observed in men compared to women<sup>41</sup>. Male mice  
19 exhibited higher abundances of *Lachnospiraceae* (phylum *Firmicutes*) and *Parabacteroides* spp.  
20 (phylum *Bacteroidetes*) and *Proteobacteria* than female mice<sup>35,42</sup>. Additionally, testosterone  
21 administration to female neonatal rats decreased gut microbial diversity during adulthood, and  
22 increased the ratio of the two most abundant phyla, *Firmicutes* and *Bacteroidetes*<sup>37</sup>. The  
23 hormone-dependent changes in gut microbiota were more robust compared to the diet-induced  
24 changes in these rats<sup>37</sup>. Ovariectomy also alters gut microbial diversity in adult mice<sup>35,42,43</sup>.  
25 While obesity and *ob/ob* genotype are associated with a reduction in *Bacteroidetes/Firmicutes*  
26 ratio in humans and male mice, respectively<sup>44-46</sup>, it is not known whether leptin affects gut  
27 microbiota in females. In addition, it is essential to understand the potential effects of the  
28 interaction of leptin and E2 on gut microbiota. Thus, using a mouse model of obesity (*ob/ob*),  
29 the present study tested the hypothesis that E2 and leptin alter gut microbiota and energy  
30 homeostasis in female mice.

31

## 1           2           3 4           5           6           7           8           9           10           11           12           13           14           15           16           17           18           19           20           21           22           23           24           25           26           27           28           29           30           31           32           33           34           35           36           37           38           39           40           41           42           43           44           45           46           47           48           49           50           51           52           53           54           55           56           57           58           59           60           61           62           63           64           65

### 1           2           3           4           5           6           7           8           9           10           11           12           13           14           15           16           17           18           19           20           21           22           23           24           25           26           27           28           29           30           31           32           33           34           35           36           37           38           39           40           41           42           43           44           45           46           47           48           49           50           51           52           53           54           55           56           57           58           59           60           61           62           63           64           65

Body weight and food intake data were collected every four days from the four experimental groups: control E2, control Veh, *ob/ob* E2, and *ob/ob* Veh. Longitudinal analysis of weight change showed that E2 decreased weight gain ( $F=15.67$ ,  $p<0.001$ ; ANOVA) in female mice fed a HFD. E2 treatment attenuated weight gain from day 11 through the end of the study (Figures 1A and 1B). Within-genotype comparison showed that E2 attenuated weight gain in Het mice from days 11-35, compared to Veh mice. For *ob/ob* mice, E2 reduced weight gain on days 11, 15 and 27-35, and showed strong trends on days 19 ( $p=0.059$ ) and 23 ( $p=0.063$ ). Because the Het and *ob/ob* mice had different weights at the beginning of the study, the % weight gain was also analyzed to remove the bias due to existing differences in weights prior to hormone treatment and diet change. Similar to the effects on body weight, E2 treatment reduced % weight gain from days 11-35. In particular, E2-treated Het mice gained less % weight than Veh Het mice on days 11- 35 (Figure 1B). Within the *ob/ob* mice, E2 decreased % weight gain on days 7-15 and 27-35.

Genotype also affected weight gain ( $F=1119.79$ ,  $p<0.001$ ; ANOVA) and % weight gain on longitudinal measures ( $F=4.23$ ,  $p=0.047$ ; ANOVA). *ob/ob* mice weighed more than control Het mice at all time points regardless of the hormone treatment. At the start of the study, *ob/ob* mice weighed approximately twice that of the Het mice, which persisted throughout the study. Finally, there was an interaction of E2 and genotype on body weight ( $F=4.21$ ,  $p=0.048$ ; ANOVA), with E2-treated Het mice gaining more % weight than E2-treated *ob/ob* mice on days 4 and 7 (Figure 1B). The Veh mice did not differ in % weight gain between the two genotypes.

E2 treatment reduced HFD consumption ( $F=11.04$ ,  $p=0.002$ ; ANOVA) from days 7 to 19 (Figure 1C). Analysis within each genotype showed that E2 attenuated food intake in *ob/ob* mice, but not in Hets, on days 7, 11 and 15. Comparison between lean Hets and *ob/ob* mice showed that obesity profoundly increased food intake ( $F=110.5$ ,  $p<0.001$ , ANOVA). Het mice consumed less calories than *ob/ob* mice throughout the study. Within the E2-treated groups, an increase in food intake in *ob/ob* groups compared to E2 Het mice was observed only at the beginning (days 7 and 11) and end (days 27, 31 and 35) of the study. There was an interaction between genotype

1  
2  
3  
4 1 and treatment on food intake ( $F=5.52$ ,  $p=0.029$ ; ANOVA). We also observed a decrease in food  
5  
6 2 intake on day 19 in *ob/ob* Veh mice, but not other groups, following surgery for removal of  
7  
8 3 BrdU osmotic pumps on day 16.  
9

#### 10 4 11 5 *Estradiol and genotype alter gut microbial diversity during HFD*

12 6 To assess the impact of E2 treatment and obesity on  $\alpha$ -diversity of the gut microbiota, 16S rDNA  
13 7 from fecal samples from *ob/ob* and Het mice were analyzed. The data set contained 137 samples  
14 8 after removing samples with less than 2,000 reads. The 16S rDNA targeted sequencing yielded  
15 9 25399 reads/sample on average (range 11,154 - 82,733). Clustering of these 16S sequence tags  
16 10 produced 473 OTUs at 97% similarity level. The identified OTUs belonged to 10 phyla, 42  
17 11 families and 62 genera based on the Greengenes database. During HFD, *ob/ob* mice had a lower  
18 12 number of total identified OTUs than Het mice, indicating that *ob/ob* mice had lower species  
19 13 richness than control mice (Figure 2A;  $p=0.002$ , linear regression). In addition, E2 treatment  
20 14 was associated with lower species evenness in both genotypes, suggesting that E2-treated mice  
21 15 have a more heterogeneous distribution of gut microbial communities than Veh mice (Figure 2B;  
22 16  $p=0.0008$ ).  
23  
24  
25  
26  
27  
28  
29  
30  
31  
32  
33  
34  
35  
36  
37  
38  
39  
40  
41  
42  
43  
44  
45  
46  
47  
48  
49

50 17 The ordination plot based on Bray-Curtis Distance, which measures differences due to relative  
51 18 abundances and composition, showed that the four experimental groups differ from each other in  
52 19 microbial communities as shown by their distinct clustering (Figure 3;  $p=0.004$ , PERMANOVA).  
53 20 The first and second principal coordinates (PCo1 and PCo2) explain 29.4% and 17.5% of the  
54 21 variation in the microbial communities, respectively. Genotype, most likely through obesity,  
55 22 accounted for most of the difference observed as reflected by PCo1 ( $p=4E-8$ , t-test, Figure 3).  
56 23 There was also a clear effect of E2 treatment, represented by PCo2 ( $p=0.001$ , t-test, Figure 3).  
57 24  
58 25

59 26 Similar analyses were performed using Bray-Curtis Distance measures on each day to  
60 27 characterize the temporal changes in gut microbiota across groups. The effect of E2 on  $\beta$ -  
61 28 diversity was robust and continuously observed from the 2<sup>nd</sup> week of OVX (days 15-35). The  
62 29 effect of genotype was also observed on days 7,15, 23 and 35, and a trend was observed on the  
63 30 remaining two days (4 and 31) (Table 1).  
64  
65

1  
2  
3  
4 1 *Estradiol treatment alters relative abundances of intestinal microbiota*

5  
6 2 Gut microbial community composition was analyzed further on aggregated data from all days to  
7  
8 3 identify the relative abundances at the phylum, family and genus levels (Figure 4). E2-mediated  
9  
10 4 shifts in relative abundances was evident on many of these taxa levels. In all four experimental  
11  
12 5 groups, the most prevalent phyla (>90%) were *Firmicutes*, *Bacteroidetes*, *Actinobacteria* and  
13  
14 6 *Tenericutes* (Figure 4A). The two most abundant families were *S24-7* and *Lachnospiraceae*,  
15  
16 7 within *Bacteroidetes* and *Firmicutes*, respectively (Figure 4B). At the genus level, *Coprococcus*  
17  
18 8 and *Ruminococcus* (both within phylum *Firmicutes*) were the most abundant (Figure 4C).  
19  
20 9

21 10 To identify whether the differences in community structure were driven by differences in the  
22  
23 11 relative abundances of particular microbial taxa, a differential abundance analysis based on  
24  
25 12 overdispersed Poisson regression model was run on aggregate data to uncover the effects of  
26  
27 13 treatment (Figure 5A) and genotype (Figure 5B). In the cladogram, the nodes in the first circle  
28  
29 14 represent phyla, and the extending outer nodes in each level represent lower taxa within each  
30  
31 15 phylum. A total of 26 taxa were differentially associated between E2 and Veh groups (Figure  
32  
33 16 6A). At the phylum level, *Firmicutes* were more associated with Veh treatment, while  
34  
35 17 *Bacteroidetes* were associated with E2 treatment (Figures 5A and 6A). Within *Firmicutes*, the  
36  
37 18 class *Erysipelotrichi*, including *Allobaculum* and *Coprobacillus* spp., were more abundant in Veh  
38  
39 19 than E2 mice. Similarly, the relative abundances of the class *Bacilli*, including its families  
40  
41 20 *Lactobacillaceae* and *Peptostreptococcaceae*, were greater in Veh than E2 groups. Another  
42  
43 21 family, *Streptococcaceae* (phylum *Firmicutes*), including *Lactococcus* spp., were also more  
44  
45 22 associated with Veh mice. In contrast, the family *Ruminococcaceae* (phylum *Firmicutes*) was  
46  
47 23 more abundant in E2 mice. Within *Bacteroidetes*, the class *Bacteroidia*, and its lower taxa  
48  
49 24 *Bacteroidales* and *S24-7*, were more abundant in E2 than Veh mice (Figures 5A and 6A).  
50  
51 25

52 26 For the taxa that differed across groups as detected by the aggregated data, the effect of E2  
53  
54 27 treatment on relative abundances was analyzed for each day. A comprehensive list of the taxa  
55  
56 28 and associated q-values and fold changes between E2 and Veh mice for each day is provided in  
57  
58 29 Supplemental Table 1. At the phylum level, E2-treated mice resisted a decrease in relative  
59  
60 30 abundances of *Bacteroidetes* compared to Veh mice on days 23 (q=0.007) and 31 (q=0.09)  
61  
62  
63  
64  
65

1  
2  
3  
4  
5  
6  
7  
8  
9  
10  
11  
12  
13  
14  
15  
16  
17  
18  
19  
20  
21  
22  
23  
24  
25  
26  
27  
28  
29  
30  
31  
32  
33  
34  
35  
36  
37  
38  
39  
40  
41  
42  
43  
44  
45  
46  
47  
48  
49  
50  
51  
52  
53  
54  
55  
56  
57  
58  
59  
60  
61  
62  
63  
64  
65

1 (Figure 7A). A main driver of the shifts in *Bacteroidetes* was the family *S24-7*. E2-treated mice  
2 resisted a decrease in *S24-7* abundances compared to Veh mice on day 23 ( $q=0.015$ ) (Figure 7B).  
3  
4 Compared to Veh mice, E2-treated animals resisted changes in relative abundances of the  
5 phylum *Firmicutes*, with lower relative abundances of *Firmicutes* on days 23 ( $q=0.01$ ), 31  
6 ( $q=0.06$ ) and 35 ( $q=0.04$ ) compared to Veh mice (Figure 8A). Within *Firmicutes*, *Lactobacillus*  
7 spp. showed a significant reduction on day 31 ( $q=0.05$ ) in E2-treated mice (Figure 8D).  
8  
9 Estradiol also altered the relative abundance of the phylum *Actinobacteria* from days 15 to 35.  
10 On these days, E2 mice resisted increases in the relative abundances of *Actinobacteria* compared  
11 to Veh mice (Figure 9A). The E2-mediated effect on *Actinobacteria* was due mostly to the  
12 family *Coriobacteriaceae* which resisted this increase also on days 15 ( $q=0.001$ ), 23 ( $q<0.001$ )  
13 and 35 ( $q=0.03$ ) (Figure 9B).

#### 15 *Obesity modifies relative abundances of gut microbiota*

16 As the gut microbial communities of the female mice clustered separately based on obesity (in  
17 *ob/ob* genotype) (Figure 3), we further analyzed the effects of obesity on relative abundances at  
18 the taxa levels (Figure 5B). A total of 26 identified taxa showed a differential association  
19 between *ob/ob* and Het mice (Figure 6B). Comparison of the gut microbial communities between  
20 genotypes revealed that the phylum *Firmicutes*, including its families *Lactobacillaceae*,  
21 *Turibacteraceae*, *Peptostreptococcaceae*, *Dehalobacteriaceae*, and *Ruminococcaceae* and the  
22 genera *Lactobacillus*, *Turibacter*, *Dehalobacterium*, *Dorea*, *Ruminococcus*, and *Oscillospira*  
23 were more abundant in control Het mice than *ob/ob* mice. Similarly, the phylum *Actinobacteria*  
24 and its family *Coriobacteriaceae* showed a greater abundance in control Het mice. In contrast,  
25 *Enterococcus*, *Coprococcus*, *Lachnospira*, *Anaerotruncus* and *Coprobacillus* spp. of the phylum  
26 *Firmicutes* were more abundant in *ob/ob* mice compared to Het mice (Figures 5B and 6B).

28 Differential abundance analysis across days showed that genotype affected the relative  
29 abundances of multiple taxa (Supplemental Table 2). Leptin increased the relative abundances  
30 of *Bacteroidetes* and its family *S24-7* in Het mice at the beginning (day 4;  $q=0.04$ ), but by day 23  
31 (after 19 days on HFD;  $q=0.03$ ), levels of these microbes were lower than in *ob/ob* mice (Figure

1  
2  
3  
4 1 7). Within the phylum *Firmicutes*, *Clostridium*, *Lactobacillus* and *Lactococcus* spp. were altered  
5  
6 2 by genotype. *Lactococcus* was more abundant in *ob/ob* mice on days 7 (q=0.01), 15 (q=0.002)  
7  
8 3 and 35 (q=0.007) (Figure 8D). In contrast, *Clostridium* and *Lactobacillus* spp. were more  
9  
10 4 abundant in Het mice. *Clostridium* was higher in Het mice on days 4 (q=0.04), 7 (q=0.01) and  
11  
12 5 15 (q<0.001) than *ob/ob* mice (Figure 8B). Similarly, the relative abundance of *Lactobacillus*  
13  
14 6 increased in Het mice compared to *ob/ob* mice on days 4 (q=0.01), 7 (q<0.001) and 23 (q=0.001)  
15  
16 7 (Figure 8D).

17 8  
18  
19 9 Obesity also altered the relative abundance of the phylum *Actinobacteria* over time. Compared  
20  
21 10 to *ob/ob* mice, Het mice had an increase in relative abundance of *Actinobacteria* from days 7 to  
22  
23 11 35 (Figure 9A). This leptin-dependent increase in *Actinobacteria* in Hets was due mostly to  
24  
25 12 *Coriobacteriaceae* (family). Similar to *Actinobacteria*, *Coriobacteriaceae* abundance increased  
26  
27 13 in Het mice from days 7 to 35 (Figure 9B), suggesting this microbial family is influenced by  
28  
29 14 leptin or obesity status during HFD.

## 30 15 31 16 32 17 **Discussion**

34 18 Using leptin-deficient *ob/ob* female mice fed a HFD, we investigated the effects of estradiol and  
35  
36 19 obesity (due to leptin deficiency) on body weight, energy intake, and gut microbiota in the  
37  
38 20 present study. We found that E2 treatment decreases food intake and protects against HFD-  
39  
40 21 induced weight gain in both *ob/ob* (obese) and Het (lean) females. *ob/ob* mice had increased  
41  
42 22 HFD intake and greater body weight, compared to the Het controls. These differences in food  
43  
44 23 intake and body weight between the two genotypes are reflected in their changes in gut  
45  
46 24 microbiota. Both E2 treatment and genotype altered gut microbiota diversity. *ob/ob* female  
47  
48 25 mice exhibited lower species richness, which supports previous studies that link obesity with a  
49  
50 26 reduced gut microbiota diversity in humans and male mice<sup>47-49</sup>. Interestingly, E2 treatment was  
51  
52 27 associated with lower species evenness compared to Veh mice. At the phylum level, E2  
53  
54 28 treatment slowed down a HFD-induced decrease in *Bacteroidetes* and increase in *Firmicutes* and  
55  
56 29 *Actinobacteria* compared to Veh controls. Leptin also altered the relative abundances of  
57  
58 30 *Bacteroidetes* and *Firmicutes* and profoundly increased *Actinobacteria*. These findings suggest  
59  
60 31 that E2 and leptin modulate gut microbiota to mediate energy regulation during HFD intake in  
61  
62 32 females.



1  
2  
3  
4  
5  
6  
7  
8  
9  
10  
11  
12  
13  
14  
15  
16  
17  
18  
19  
20  
21  
22  
23  
24  
25  
26  
27  
28  
29  
30  
31  
32  
33  
34  
35  
36  
37  
38  
39  
40  
41  
42  
43  
44  
45  
46  
47  
48  
49  
50  
51  
52  
53  
54  
55  
56  
57  
58  
59  
60  
61  
62  
63  
64  
65

1

## 2 *E2 alters gut microbial community diversity in ob/ob female mice on a HFD*

3 We and others have shown that E2 protects female mice from HFD-induced obesity<sup>10,11,13,50-53</sup>.  
4 Estrogens exert protective effects by acting directly on brain<sup>10-12,54</sup>, pancreas<sup>55</sup>, liver<sup>50,51,53,56</sup>,  
5 adipose tissue<sup>53</sup>, and muscle<sup>57,58</sup> to regulate energy production and utilization. Moreover, long-  
6 term E2 treatment improves glucose tolerance and insulin sensitivity and attenuates lipid  
7 biosynthesis in liver in *ob/ob* female mice<sup>59</sup>. The present findings provide evidence that the  
8 modulation of gut microbiota is another mechanism by which E2 mediates energy homeostasis.  
9 While E2 was associated with a decrease in the gut microbial evenness in the current study, an  
10 increase in microbial diversity has been reported in cycling rats and E2-treated female mice<sup>37,60</sup>.  
11 These differences across studies could be due to fluctuating estrogens and other ovarian  
12 hormones in the cycling rats and/or species differences<sup>37</sup>, and a much higher dose of estradiol  
13 (2.5 mg/day, consistent with levels at pregnancy) used in the mice<sup>60</sup>. Alternatively, while a  
14 lower microbial diversity is usually associated with obesity and metabolic disorders<sup>61,62</sup>, a  
15 change in relative abundance without any changes in microbial richness or evenness can also  
16 alter microbial homeostasis<sup>44</sup>.

17

## 18 *Potential implications of E2-mediated alterations in gut microbiota composition in ob/ob female* 19 *mice on HFD*

20 E2 attenuated a longitudinal shift in the two major phyla *Bacteroidetes* and *Firmicutes*,  
21 compared to the Veh controls. In particular, the order *Bacteroidales*, and its families *S24-7* and  
22 *Ruminococcaceae* were positively associated with E2 treatment, whereas relative abundances of  
23 *Allobaculum* spp. were decreased. The current and previous studies suggest that various gut  
24 microbial communities collectively exert E2-mediated protection against HFD-induced weight  
25 gain<sup>37,42</sup>.

26

27 Functional predictions of microbial taxa in a population are mostly derived from the gene  
28 families they express. *S24-7* and *Ruminococcaceae*, both microbial families upregulated by E2  
29 in the current study, produce short chain fatty acids (SCFA; fermented products of dietary fibers)  
30 that protect against inflammation<sup>63-65</sup>. In particular, SCFA, including butyrate, maintain a low  
31 pH in the gastrointestinal tract and aid in nutrient absorption and pathogen inactivation<sup>66</sup>. In

1  
2  
3  
4  
5  
6  
7  
8  
9  
10  
11  
12  
13  
14  
15  
16  
17  
18  
19  
20  
21  
22  
23  
24  
25  
26  
27  
28  
29  
30  
31  
32  
33  
34  
35  
36  
37  
38  
39  
40  
41  
42  
43  
44  
45  
46  
47  
48  
49  
50  
51  
52  
53  
54  
55  
56  
57  
58  
59  
60  
61  
62  
63  
64  
65

1 support of the important role of *S24-7* and *Ruminococcaceae* in inflammation, both of these  
2 families are downregulated in inflammatory conditions, including Crohn's disease, colitis and  
3 type I diabetes<sup>67-69</sup>. Taken together, the current findings suggest that E2 provides protection  
4 against diet-induced metabolic disorders in females by maintaining healthy levels of microbial  
5 populations, such as *S24-7* and *Ruminococcaceae*.

6  
7 *Firmicutes*, another phylum that was altered by E2 in the current study, is generally associated  
8 with obesity in rodents and humans<sup>70</sup>. Studies in males have shown that a high caloric diet  
9 profoundly affects this phylum<sup>29,71,72</sup>. Consistent with these findings in males, in the present  
10 study, Veh female mice on a HFD gained weight and had increased levels of *Firmicutes*.  
11 However, E2-treated mice resisted this HFD-induced increase, suggesting that modulation of  
12 these microbes contributes to the regulation of energy homeostasis by estrogens. *Firmicutes*  
13 contain more OTUs that are efficient energy producers than *Bacteroidetes*, leading to increased  
14 calorie absorption and weight gain<sup>73</sup>. Additionally, some members of *Firmicutes* promote the  
15 formation of lipid droplets resulting in increased fatty acid absorption and weight gain<sup>74</sup>. In the  
16 current study, E2 altered relative abundances of *Firmicutes* in both Het and *ob/ob* mice,  
17 suggesting that E2 affects this phylum independent of body weight and leptin levels.

18  
19 *Obesity alters gut microbial community diversity in female mice on a HFD*

20 The obese leptin-deficient (*ob/ob*) mice had less diverse microbiota as observed by species  
21 richness, suggesting that leptin is required for an enriched microbial ecosystem. In support,  
22 obesity is associated with a decreased microbial diversity in humans<sup>47</sup>. Furthermore, a Danish  
23 study on men and women found that higher levels of leptin in obese populations were associated  
24 with a lower richness of the gut microbial communities, suggesting that optimum levels of leptin  
25 are associated with metabolic health and a more diverse gut microbiota<sup>48</sup>. Taken together, the  
26 present results indicate that a shift in leptin levels in either direction disrupts metabolic  
27 homeostasis and alters microbial homeostasis.

28  
29 *Potential implications of obesity-induced alterations in gut microbiota composition in female*  
30 *mice on a HFD*

1  
2  
3  
4  
5  
6  
7  
8  
9  
10  
11  
12  
13  
14  
15  
16  
17  
18  
19  
20  
21  
22  
23  
24  
25  
26  
27  
28  
29  
30  
31  
32  
33  
34  
35  
36  
37  
38  
39  
40  
41  
42  
43  
44  
45  
46  
47  
48  
49  
50  
51  
52  
53  
54  
55  
56  
57  
58  
59  
60  
61  
62  
63  
64  
65

1 While we observed a direct correlation of the relative abundances of *Bacteroidetes* and its family  
2 *S24-7* with leptin (in Het mice) at the beginning of the study, by day 23, their levels dropped to  
3 even lower levels than *ob/ob* mice, suggesting a pronounced negative effect of HFD on  
4 *Bacteroidetes* in Hets. Within *Firmicutes*, *ob/ob* mice had lower relative abundances of  
5 *Clostridium* and *Lactobacillus* compared to control Het mice. In support, high leptin levels  
6 associate with *Lactobacillales*, the order containing *Lactobacillus* spp., in African-American  
7 men<sup>75</sup>. Most *Lactobacilli* spp. are negatively correlated with inflammation and exert their  
8 beneficial effects through modulation of the immune system via macrophage and dendritic cell  
9 functions<sup>76,77</sup>. These findings suggest that regulation of gut microbiota by leptin is an important  
10 mechanism for metabolic homeostasis.

11  
12 While *ob/ob* mice weighed almost twice that of Het mice in the beginning, the percent weight  
13 gain was greater in Veh Hets compared to Veh *ob/ob* mice. Interestingly, the phylum  
14 *Actinobacteria* showed a greater relative abundance in Hets compared to *ob/ob* mice, primarily  
15 due to an increase in its family *Coriobacteraceae*. *Actinobacteria* is increased in obese humans  
16 and is associated with ulcerative colitis<sup>47,62</sup>. More than two-thirds of the obesity-related human  
17 gut microbes belong to *Actinobacteria*<sup>47,78</sup>. In particular, *Coriobacteriaceae* have been  
18 positively associated with increased cholesterol absorption in hamsters and obese humans<sup>79,80</sup>.  
19 A profound increase in the abundance of *Coriobacteriaceae* in Veh Het mice, the group that  
20 showed the highest percent weight gain, but not in E2 Hets, suggests this OTU is associated with  
21 HFD-induced weight gain.

22  
23 *Possible mechanisms for estradiol- and leptin-regulation of gut microbiota*

24 Estrogens elicit many effects on physiology and behavior by binding to their intracellular and  
25 membrane receptors<sup>81-84</sup>. While estrogen receptor- $\alpha$  (ER $\alpha$ ) and ER $\beta$  have been implicated in the  
26 effects of estrogens on metabolism<sup>85-87</sup>, ER $\alpha$  appears to be the primary contributor to energy  
27 balance<sup>85,88-90</sup>. ER $\alpha$  knock-out mice exhibit increased visceral adiposity, impaired glucose  
28 tolerance and elevated insulin levels<sup>90</sup>. Further, systemic activation of ER $\alpha$ , but not ER $\beta$ ,  
29 decreases food intake and body weight in female rats<sup>89</sup>. While the effects of ER $\alpha$  on the gut  
30 microbiota have not been investigated directly, a study using ER $\beta$  knock-out female mice

1  
2  
3  
4  
5  
6  
7  
8  
9  
10  
11  
12  
13  
14  
15  
16  
17  
18  
19  
20  
21  
22  
23  
24  
25  
26  
27  
28  
29  
30  
31  
32  
33  
34  
35  
36  
37  
38  
39  
40  
41  
42  
43  
44  
45  
46  
47  
48  
49  
50  
51  
52  
53  
54  
55  
56  
57  
58  
59  
60  
61  
62  
63  
64  
65

1 suggests that ER $\beta$  influences gut microbiota in a diet-specific manner<sup>91</sup>. In support of this  
2 finding, ER $\beta$  is expressed in colon epithelial cells<sup>92,93</sup>.

3  
4 Estrogens also act as direct substrates for gut microbiota. For example, microbes with  $\beta$ -  
5 glucuronidase and  $\beta$ -glucosidase enzymes, including *Lactobacillus*, *Bifidobacterium*,  
6 *Clostridium* spp., convert inactive estrogens into their active forms through deconjugation<sup>94-96</sup>.  
7 Estrogens can also alter metabolic outcome and immune response through direct actions on gut  
8 microbiota. For example, production of lipopolysaccharides (LPS), a component of Gram-  
9 negative bacteria, is elevated after 4 weeks of HFD and is associated with obesity and insulin  
10 resistance in male mice<sup>97,98</sup>. E2 treatment may protect from HFD-induced metabolic disorders  
11 through blocking LPS activation, suggesting the attenuation of microbial LPS production as a  
12 mechanism of E2-mediated protection against HFD-induced obesity<sup>99</sup>. Additionally, E2 up-  
13 regulates production and activity of intestinal alkaline phosphatase, a protein with protective  
14 function in the gut epithelium through attenuation of the production of pro-inflammatory signals  
15 in the<sup>42</sup>. Taken together with the present findings, estrogens can alter gut microbiota through  
16 multiple direct and indirect mechanisms to protect from metabolic disorders.

17  
18 The mechanisms by which leptin affects gut microbiota are not well understood. While  
19 intestinal epithelium expresses leptin receptors (LepR), ablation of these receptors in male mice  
20 does not alter gut microbiota or body weight<sup>100</sup>. In females, however, leptin could act in concert  
21 with ER $\beta$ , which is expressed in the gut epithelium<sup>92,93</sup>. While genotype effects may be  
22 primarily dependent on leptin, it is important to note that *ob/ob* mice are obese and Het mice are  
23 lean. Obesity is an independent modulator of gut microbiota. Obese and lean twins exhibit  
24 differences in gut microbial diversity<sup>47</sup>, and the obese phenotype can be transferred to lean  
25 recipients through the transplant of gut microbiota from obese donors<sup>29,30</sup>. In addition, female  
26 *ob/ob* mice have reduced estrogen levels and are sterile, and thus have altered hormone-  
27 dependent development<sup>26,101</sup>. These findings suggest that leptin affects host physiology,  
28 including gut microbial homeostasis through multiple mechanisms.

29  
30 This study provides critical insights into the roles of estradiol and leptin in HFD-induced obesity  
31 and gut microbiota. While the identification of taxa that differ between treatments is the first step

1  
2  
3  
4 1 towards defining their functions, many microbes share redundant metabolic functions <sup>61</sup>.  
5  
6 2 Metagenomic analysis, or correlation analysis between gut microbiota and metabolic changes,  
7  
8 3 will provide further important insights on microbial community-specific functions and their  
9  
10 4 effects on metabolism.

## 11 5 12 13 6 **Conclusion**

14  
15 7 This study provides evidence for the function of estrogens in energy homeostasis through novel  
16  
17 8 actions on gut microbiota. Estrogens altered the microbiota community in female mice that were  
18  
19 9 fed a HFD. Furthermore, the use of female *ob/ob* mice that lack leptin suggests a novel function  
20  
21 10 for this adipokine in the regulation of gut microbiota in females. Finally, given that many  
22  
23 11 metabolic and inflammatory bowel diseases are characterized by disturbances in the gut  
24  
25 12 microbiome, understanding the functions of E2 and leptin in modulating gut microbiome in  
26  
27 13 females has important therapeutic applications for women with metabolic disorders.

## 28 14 29 30 15 **MATERIALS AND METHODS**

### 31 16 *Animals*

32  
33 17 Seven week-old lean heterozygote (Het) and obese *ob/ob* (lacking leptin) mice (n=24/genotype)  
34  
35 18 were purchased from Jackson Laboratory (Bar Harbor, Maine) and kept on a 12:12 light:dark  
36  
37 19 cycle. Het mice, which have a metabolic phenotype similar to wildtype mice as evidenced by  
38  
39 20 normal serum glucose and insulin levels, body temperature and energy expenditure <sup>19</sup>, were used  
40  
41 21 as controls <sup>21</sup> to account for genetic background. While phenotypically very similar, Het mice  
42  
43 22 have lower leptin levels than wildtype mice <sup>102</sup>. Mice were ovariectomized (OVX) and  
44  
45 23 subcutaneously implanted with a silastic capsule containing E2 (50µg in 25µl of 5%  
46  
47 24 ethanol/sesame oil) or Veh (5% ethanol/sesame oil) to get the following four experimental  
48  
49 25 groups: control E2, 2) control Veh, 3) *ob/ob* E2, and 4) *ob/ob* Veh. Following surgery, mice  
50  
51 26 were pair-housed with a mouse of the same genotype and treatment.

52 27  
53  
54 28 On day 7, all mice underwent intracranial surgery for the implantation of an intraventricular  
55  
56 29 cannula attached to a subcutaneous osmotic pump filled with bromodeoxyuridine (BrdU), to  
57  
58 30 label newborn neurons for another study. The osmotic pumps were removed after 10 days. On  
59  
60 31 day 35, animals received an intraperitoneal injection of leptin (5 mg/kg) 45 minutes prior to

1  
2  
3  
4  
5  
6  
7  
8  
9  
10  
11  
12  
13  
14  
15  
16  
17  
18  
19  
20  
21  
22  
23  
24  
25  
26  
27  
28  
29  
30  
31  
32  
33  
34  
35  
36  
37  
38  
39  
40  
41  
42  
43  
44  
45  
46  
47  
48  
49  
50  
51  
52  
53  
54  
55  
56  
57  
58  
59  
60  
61  
62  
63  
64  
65

1 being euthanized. Animals that lost weight and/or sustained infection from pump implants or  
2 stereotaxic surgery were excluded from the study. All procedures were approved by the  
3 Institutional Animal Care and Use Committee of Wellesley College.

#### 4 *Food intake and body weight measurements and fecal sample collection*

5 Following OVX (day 0), all mice were maintained on a standard diet for three days (13.5%  
6 calories from fat, Purina, #5001) before switching to a HFD (58.4% calories from fat Harlan  
7 Teklad, #03584) on day 4 and maintained on a HFD for the remainder of the study.

8 Throughout the experiment, food intake and body weights were recorded every four days. For  
9 cages in which one mouse died, the amount of food eaten by the remaining mouse was doubled  
10 to match the amount with cages containing two mice. Fecal samples were collected from the  
11 cages on days 4, 7, 15, 23, 31, and 35 and immediately stored at -80°C.

#### 12 *DNA extraction from fecal samples, 16S rDNA sequencing and bioinformatics processing*

13 DNA was extracted from fecal samples using a MoBio PowerSoil® DNA Isolation Kit (Valencia,  
14 CA) with minor adjustments to the manufacturer's protocol. A 5-minute incubation with the  
15 elution buffer before centrifugation was added to increase the DNA yield. The quality and  
16 quantity of the DNA samples were measured using Nanodrop (Thermo Scientific, Waltham,  
17 MA). The samples were stored at -20°C until sequencing.

18 The V3-V4 region of the 16S rDNA was amplified in all samples using the following universal  
19 16S rDNA primers: forward 341F (5'-CCTACGGGAGGCAGCAG-3') and reverse 806R (5'-  
20 GGACTACHVGGGTWTCTAAT-3') with sequence adapters on both primers and sample-  
21 specific Golay barcodes on the reverse primer<sup>103</sup>. The PCR products were quantified by  
22 PicoGreen (Invitrogen, Carlsbad, CA) using a plate reader. After quantification, amplicons were  
23 pooled in equal concentrations, cleaned up using UltraClean PCR Clean-Up Kit (MoBio,  
24 Carlsbad, CA), and again quantified using the Qubit (Invitrogen, Carlsbad, CA). The pooled  
25 samples were then sequenced using paired-end v2 chemistry using Illumina Miseq sequencing  
26 technology (Illumina, San Diego, CA) at the Microbiome Core, Mayo Clinic (Rochester,  
27 Minnesota).

1  
2  
3  
4  
5  
6  
7  
8  
9  
10  
11  
12  
13  
14  
15  
16  
17  
18  
19  
20  
21  
22  
23  
24  
25  
26  
27  
28  
29  
30  
31  
32  
33  
34  
35  
36  
37  
38  
39  
40  
41  
42  
43  
44  
45  
46  
47  
48  
49  
50  
51  
52  
53  
54  
55  
56  
57  
58  
59  
60  
61  
62  
63  
64  
65

1 Paired R1 and R2 sequence reads were then processed via the *hybrid-denovo* bioinformatics  
2 pipeline, which clustered a mixture of good-quality paired-end and single-end reads into  
3 operational taxonomic units (OTUs) at 97% similarity level<sup>104</sup>. OTUs were assigned taxonomy  
4 using the RDP classifier trained on the GreenGenes database (v13.5)<sup>105</sup>. A phylogenetic tree  
5 based on FastTree algorithm was constructed based on the OTU representative sequences<sup>106</sup>.  
6 Singleton OTUs as well as samples with less than 2,000 reads were removed from downstream  
7 analysis.

8

### 9 Statistical analysis

#### 10 *Food intake and weight data analysis*

11 Repeated measures ANOVAs (SPSS, v.24) were performed to examine the effects of treatment  
12 and genotype on food intake and body weight over time. After a main effect was confirmed,  
13 ANOVA without corrections was performed on measures from each day to identify the days  
14 when an effect of one or both variables were present. One-way ANOVAs were then conducted  
15 to identify differences between specific groups when effects of treatment or genotype were  
16 present. Differences were considered statistically significant at  $p < 0.05$ .

17

#### 18 *16S rDNA sequence analysis*

19 Analyses were first performed on the aggregated data, in which sequence reads from all samples  
20 from the same mice across days were aggregated. To study specific longitudinal trends, stratified  
21 analyses on individual days were also performed if needed.

22

#### 23 *Diversity analysis*

24 Both  $\alpha$ -diversity and  $\beta$ -diversity were analyzed on the rarefied OTU data.  $\alpha$ -diversity (within-  
25 sample diversity) reflects species richness and evenness within the microbial populations. Two  
26 representative  $\alpha$ -diversity measures were investigated: the observed number of OTUs, an index  
27 of the species richness, and the Pielou's evenness index<sup>107</sup>. A multiple linear regression model  
28 ("lm" function in R) was used to test the association between  $\alpha$ -diversity (outcome) and  
29 treatment/genotype (covariates, both included in the model).

30

1  
2  
3  
4  
5  
6  
7  
8  
9  
10  
11  
12  
13  
14  
15  
16  
17  
18  
19  
20  
21  
22  
23  
24  
25  
26  
27  
28  
29  
30  
31  
32  
33  
34  
35  
36  
37  
38  
39  
40  
41  
42  
43  
44  
45  
46  
47  
48  
49  
50  
51  
52  
53  
54  
55  
56  
57  
58  
59  
60  
61  
62  
63  
64  
65

1  $\beta$ -diversity (between-sample diversity) reflects the shared diversity between bacterial populations  
2 in terms of ecological distances; pair-wise distance measure allows quantification of the overall  
3 compositional difference between samples. Different  $\beta$ -diversity measures provide distinctive  
4 views of the community structure. The  $\beta$ -diversity measures were calculated using Bray-Curtis  
5 Dissimilarity, which measures differences in bacterial composition based on taxa abundances  
6 (“vegdist” function in the R “vegan” package, v2.4-3). To test the association between  $\beta$ -  
7 diversity measures and treatment or genotype, we used PERMANOVA (999 permutations,  
8 “adonis” function in the R “vegan” package, v2.4-3) when adjusting the effect of the other  
9 covariate. Ordination plots were generated using principal coordinate analysis (PCoA) on the  
10 distance matrix (“cmdscale” function in R) <sup>108</sup>.

### 11 12 *Taxa level analysis*

13 Differential abundance analyses were performed at the phylum, class, order, family and genus  
14 levels. Taxa with prevalence less than 10% or with a maximum proportion less than 0.2% were  
15 excluded from analysis to reduce the number of tests. An overdispersed Poisson model was fitted  
16 to the taxa counts with treatment and genotype as covariates (“glm” function in R) <sup>109</sup>. Wald test  
17 was used to assess significance. To account for variable sequencing depths, the GMPR size  
18 factor was estimated and used as an offset (log scale) in the regression model <sup>110</sup>. False  
19 discovery rate (FDR) control (B-H procedure, ‘p.adjust’ in R) was used to correct for multiple  
20 testing at each taxonomical level, and FDR-adjusted p-values (q-values) < 0.1 were considered  
21 significant <sup>111</sup>. The differential taxa were visualized on a cladogram using GraPhlAn <sup>112</sup>. All  
22 statistical analyses were performed in R (v. 3.3.2, R Development Core Team).

### 23 24 **Acknowledgements:**

25 This work was funded by NIH R01 DK61935 (MJT) and a Re-Entry award (EPB) from the  
26 National Institute of Diabetes and Digestive and Kidney Diseases. The authors thank the Center  
27 for Individualized Medicine, Mayo Clinic (JC), and Dr. Cassandra Pattanayak, Director of the  
28 Quantitative Analysis Institute at Wellesley College, for input on statistical analysis.

### 29 30 **Conflicts of Interest:** None



1  
2  
3  
4  
5  
6  
7  
8  
9  
10  
11  
12  
13  
14  
15  
16  
17  
18  
19  
20  
21  
22  
23  
24  
25  
26  
27  
28  
29  
30  
31  
32  
33  
34  
35  
36  
37  
38  
39  
40  
41  
42  
43  
44  
45  
46  
47  
48  
49  
50  
51  
52  
53  
54  
55  
56  
57  
58  
59  
60  
61  
62  
63  
64  
65

## 1 **Figure Legends**

2  
3 **Figure 1. Estradiol and leptin alter weight gain and food intake in adult female *ob/ob* and control mice.** (A) Average weight, (B) percent weight gain and (C) food intake per cage of *ob/ob* and heterozygote control mice with arrow indicating the start of high fat diet. The effect of genotype on average weight (A) and food intake (C) were present on all days. Days with effects of E2 are denoted by \* ( $p < 0.05$ ). Error bars indicate  $\pm$ SEM.

9 **Figure 2. *ob/ob* mice have decreased species richness compared to controls, while estradiol treatment decreases species evenness.** (A) *ob/ob* genotype is associated with lower species richness as measured by Observed Taxonomic Units. (B) E2 treatment is associated with lower species evenness as measured by the Pielou's evenness index. "a" and "b" indicate groups with different species richness while "c" and "d" indicate groups with different species evenness ( $p < 0.05$ ).

16 **Figure 3. Gut microbial communities distinctly cluster as an effect of estradiol treatment and leptin.** PCo1 and PCo2 clustering of each group. Bray-Curtis Distance was used to calculate principal coordinates 1 and 2. Each data point represents the microbiota of each mouse aggregated over all days. Ob E = Estradiol-treated *ob/ob*, Ob V = Vehicle *ob/ob*, Het E = Estradiol-treated Het, and Het V = Vehicle Het mice.

22 **Figure 4. Gut microbiota associate with estradiol treatment and genotype at multiple taxonomic levels.** Microbiota community structure at the (A) phylum, (B) family and (C) genus level, separated by treatment and genotype. Data are shown as relative proportion of the taxa identified. Taxa with prevalence of  $> 10\%$  or with a maximum proportion of  $> 0.2\%$  were included. Ob E =

1  
2  
3  
4 1 Estradiol-treated *ob/ob*, Ob V = Vehicle *ob/ob*, Het E= Estradiol-treated Het, and Het V=  
5  
6 2 Vehicle Het mice.

7  
8  
9 3  
10  
11 4 **Figure 5. Estradiol and obesity alter the gut microbial composition.** (A) Phyla and lower  
12  
13 5 level taxa associated with estradiol (E2) or vehicle (Veh) treatment. (B) Phyla and lower level  
14  
15 6 taxa associated with *ob/ob* or Het genotype.

16  
17  
18 7  
19  
20  
21 8 **Figure 6. Gut microbiota associate with estradiol treatment and obesity at multiple taxa**  
22  
23 9 **levels.** Boxplots showing microbial taxa that are significantly altered by (A) E2 treatment and (B)  
24  
25 10 genotype. Analysis was done on aggregate data from all days. Data are shown as relative  
26  
27 11 proportion of the taxa identified. Taxa with prevalence of >10% or with a maximum proportion  
28  
29 12 of > 0.2% were included.

30  
31  
32  
33 13  
34  
35  
36 14 **Figure 7. Estradiol and obesity alter the relative abundances of *Bacteroidetes* (phylum) and**  
37  
38 15 ***S24-7* (family) following the start of HFD.** Relative abundances of the (A) the phylum  
39  
40 16 *Bacteroidetes* and (B) its family *S24-7* over time. \* indicates effects of E2 and # indicates  
41  
42 17 effects of genotype ( $q < 0.1$ ).

43  
44  
45 18  
46  
47  
48 19 **Figure 8. Estradiol and obesity alter the relative abundances of the phylum *Firmicutes* and**  
49  
50 20 **its lower taxa.** Relative abundances over time of the (A) phylum *Firmicutes* and genera  
51  
52 21 (B) *Clostridium*, (C) *Lactobacillus* and (D) *Coprococcus*. \* indicates effects of E2 and #  
53  
54 22 indicates effects of genotype ( $q < 0.1$ ).

55  
56  
57  
58 23  
59  
60  
61  
62  
63  
64  
65

1  
2  
3  
4 **1 Figure 9. Estradiol and obesity resist increases in the relative abundances of the phylum**

5  
6 **2 Actinobacteria and its lower taxa.** Relative abundances of the (A) phylum *Actinobacteria* and  
7  
8  
9 (B) family *Coriobacteriaceae* over time. \* indicates effects of E2 and # indicates effects of  
10  
11  
12  
13  
14  
15  
16  
17  
18  
19  
20  
21  
22  
23  
24  
25  
26  
27  
28  
29  
30  
31  
32  
33  
34  
35  
36  
37  
38  
39  
40  
41  
42  
43  
44  
45  
46  
47  
48  
49  
50  
51  
52  
53  
54  
55  
56  
57  
58  
59  
60  
61  
62  
63  
64  
65  
4 genotype ( $q < 0.1$ ).

7 **References**

- 8 1. Asarian L, Geary N. Modulation of appetite by gonadal steroid hormones. *Philos. Trans. R. Soc. Lond. B. Biol. Sci* 2006;361(1471):1251-63.
- 9 2. Wade GN, Gray JM. Gonadal effects on food intake and adiposity: a metabolic hypothesis. *Physiol Behav* 1979;22(3):583-93.
- 10 3. Clegg DJ. Minireview: the year in review of estrogen regulation of metabolism. *Mol Endocrinol* 2012;26(12):1957-60.
- 11 4. McCarthy MM. Estradiol and the developing brain. *Physiol Rev* 2008;88(1):91-124.
- 12 5. Pfaff D, Waters E, Khan Q, Zhang X, Numan M. Minireview: estrogen receptor-initiated mechanisms causal to mammalian reproductive behaviors. *Endocrinology* 2011;152(4):1209-17.
- 13 6. Blaustein JD. Neuroendocrine regulation of feminine sexual behavior: lessons from rodent models and thoughts about humans. *Annu. Rev. Psychol.* 2008;59:93-118.
- 14 7. Roquer J, Campello AR, Gomis M. Sex differences in first-ever acute stroke. *Stroke* 2003;34(7):1581-5.
- 15 8. Carr MC. The emergence of the metabolic syndrome with menopause. *J Clin Endocrinol Metab* 2003;88(6):2404-11.
- 16 9. Guo SS, Zeller C, Chumlea WC, Siervogel RM. Aging, body composition, and lifestyle: the Fels Longitudinal Study. *Am J Clin Nutr* 1999;70(3):405-11.
- 17 10. Bless EP, Reddy T, Acharya KD, Beltz BS, Tetel MJ. Oestradiol and diet modulate energy homeostasis and hypothalamic neurogenesis in the adult female mouse. *J. Neuroendocrinol.* 2014;26(11):805-16.
- 18 11. Bless EP, Yang J, Acharya KD, Nettles SA, Vassoler FM, Byrnes EM, et al. Adult neurogenesis in the female mouse hypothalamus: Estradiol and high-fat diet alter the generation of newborn neurons expressing estrogen receptor alpha. *eNeuro* 2016;3(4):1-11.
- 19 12. Brown LM, Clegg DJ. Central effects of estradiol in the regulation of food intake, body weight, and adiposity. *J. Steroid Biochem. Mol. Biol.* 2010;122(1-3):65-73.
- 20 13. Xu Y, Nedungadi TP, Zhu L, Sobhani N, Irani BG, Davis KE, et al. Distinct hypothalamic neurons mediate estrogenic effects on energy homeostasis and reproduction. *Cell Metab* 2011;14(4):453-65.
- 21 14. Erickson JC, Hollopeter G, Palmiter RD. Attenuation of the obesity syndrome of ob/ob mice by the loss of neuropeptide Y. *Science* 1996;274(5293):1704-7.

1  
2  
3  
4  
5  
6  
7  
8  
9  
10  
11  
12  
13  
14  
15  
16  
17  
18  
19  
20  
21  
22  
23  
24  
25  
26  
27  
28  
29  
30  
31  
32  
33  
34  
35  
36  
37  
38  
39  
40  
41  
42  
43  
44  
45  
46  
47  
48  
49  
50  
51  
52  
53  
54  
55  
56  
57  
58  
59  
60  
61  
62  
63  
64  
65

1 15. Vaisse C, Halaas JL, Horvath CM, Darnell JE, Jr., Stoffel M, Friedman JM. Leptin activation  
2 of Stat3 in the hypothalamus of wild-type and ob/ob mice but not db/db mice. *Nat*  
3 *Genet* 1996;14(1):95-7.  
4 16. Sahu A. Leptin signaling in the hypothalamus: emphasis on energy homeostasis and  
5 leptin resistance. *Front Neuroendocrinol* 2003;24(4):225-53.  
6 17. Green ED, Maffei M, Braden VV, Proenca R, DeSilva U, Zhang Y, et al. The human obese  
7 (OB) gene: RNA expression pattern and mapping on the physical, cytogenetic, and  
8 genetic maps of chromosome 7. *Genome Res* 1995;5(1):5-12.  
9 18. Coleman DL. Diabetes-Obesity Syndromes in Mice. *Diabetes* 1982;31:1-6.  
10 19. Pellemounter MA, Cullen M.J., Baker, M.B.,, Hecht R, Winters, D., Boone, T., Collins, F.  
11 Effects of the obese Gene Product on Body Weight Regulation in ob/ob Mice. *Science*  
12 1995;269:540-3.  
13 20. Mistry AM, Andrew G. Swick AG, Romsos DR. Leptin Rapidly Lowers Food Intake and  
14 Elevates Metabolic Rates in Lean and ob/ob Mice. *J. Nutr.* 1997;127(10):2065-72.  
15 21. Shimomura K, Shimizu H, Tsuchiya T, Abe Y, Uehara Y, Mori M. Is leptin a key factor  
16 which develops obesity by ovariectomy? *Endocr. J.* 2002;49(4):417-23.  
17 22. Pellemounter MA, Cullen MJ, Baker MB, Hecht R, Winters D, Boone T, et al. Effects of  
18 the obese gene product on body weight regulation in ob/ob mice. *Science*  
19 1995;269(5223):540-3.  
20 23. Steppan CM, Crawford DT, Chidsey-Frink KL, Ke H, Swick AG. Leptin is a potent  
21 stimulator of bone growth in ob/ob mice. *Regul Pept* 2000;92(1-3):73-8.  
22 24. Clegg DJ, Riedy CA, Smith KA, Benoit SC, Woods SC. Differential sensitivity to central  
23 leptin and insulin in male and female rats. *Diabetes* 2003;52(3):682-7.  
24 25. Clegg DJ, Brown LM, Woods SC, Benoit SC. Gonadal hormones determine sensitivity to  
25 central leptin and insulin. *Diabetes* 2006;55(4):978-87.  
26 26. Chehab FF, Lim ME, Lu R. Correction of the sterility defect in homozygous obese female  
27 mice by treatment with the human recombinant leptin. *Nat Genet* 1996;12(3):318-20.  
28 27. Soto M, Herzog C, Pacheco JA, Fujisaka S, Bullock K, Clish CB, et al. Gut microbiota  
29 modulate neurobehavior through changes in brain insulin sensitivity and metabolism.  
30 *Mol Psychiatry* 2018.  
31 28. Cani PD. Human gut microbiome: hopes, threats and promises. *Gut* 2018;67(9):1716-25.  
32 29. Turnbaugh PJ, Ridaura VK, Faith JJ, Rey FE, Knight R, Gordon JI. The effect of diet on the  
33 human gut microbiome: a metagenomic analysis in humanized gnotobiotic mice. *Sci*  
34 *Transl Med.* 2009;1:6ra14.  
35 30. Ridaura VK, Faith JJ, Rey FE, Cheng J, Duncan AE, Kau AL, et al. Gut microbiota from  
36 twins discordant for obesity modulate metabolism in mice. *Science*  
37 2013;341(6150):1241214.  
38 31. Ley RE, Hamady M, Lozupone C, Turnbaugh P, Ramey RR, Bircher JS, et al. Evolution of  
39 mammals and their gut microbes. *Science* 2008;320(5883):1647-51.  
40 32. Round JL, Mazmanian SK. The gut microbiome shapes intestinal immune responses  
41 during health and disease. *Nat Rev Immunol* 2009;9(5):313-23.  
42 33. Kang C, Wang B, Kaliannan K, Wang X, Lang H, Hui S, et al. Gut Microbiota Mediates the  
43 Protective Effects of Dietary Capsaicin against Chronic Low-Grade Inflammation and  
44 Associated Obesity Induced by High-Fat Diet. *MBio* 2017;8(3).

1  
2  
3  
4  
5  
6  
7  
8  
9  
10  
11  
12  
13  
14  
15  
16  
17  
18  
19  
20  
21  
22  
23  
24  
25  
26  
27  
28  
29  
30  
31  
32  
33  
34  
35  
36  
37  
38  
39  
40  
41  
42  
43  
44  
45  
46  
47  
48  
49  
50  
51  
52  
53  
54  
55  
56  
57  
58  
59  
60  
61  
62  
63  
64  
65

1 34. Clarke G, Stilling RM, Kennedy PJ, Stanton C, Cryan JF, Dinan TG. Minireview: Gut  
2 microbiota: the neglected endocrine organ. *Mol Endocrinol* 2014;28(8):1221-38.  
3 35. Markle JG, Frank DN, Mortin-Toth S, Robertson CE, Feazel LM, Rolle-Kampczyk U, et al.  
4 Sex differences in the gut microbiome drive hormone-dependent regulation of  
5 autoimmunity. *Science* 2013;339(6123):1084-8.  
6 36. Tetel MJ, de Vries GJ, Melcangi RC, Panzica G, O'Mahony SM. Steroids, Stress, and the  
7 Gut Microbiome-Brain Axis. *J. Neuroendocrinol.* 2017.  
8 37. Moreno-Indias I, Sanchez-Alcoholado L, Sanchez-Garrido MA, Martin-Nunez GM, Perez-  
9 Jimenez F, Tena-Sempere M, et al. Neonatal Androgen Exposure Causes Persistent Gut  
10 Microbiota Dysbiosis Related to Metabolic Disease in Adult Female Rats. *Endocrinology*  
11 2016;157(12):4888-98.  
12 38. Org E, Mehrabian M, Parks BW, Shipkova P, Liu X, Drake TA, et al. Sex differences and  
13 hormonal effects on gut microbiota composition in mice. *Gut Microbes* 2016:0.  
14 39. Foster JA, McVey Neufeld KA. Gut-brain axis: how the microbiome influences anxiety  
15 and depression. *Trends Neurosci* 2013;36(5):305-12.  
16 40. Jasarevic E, Morrison KE, Bale TL. Sex differences in the gut microbiome-brain axis  
17 across the lifespan. *Philos. Trans. R. Soc. Lond. B. Biol. Sci* 2016;371(1688):20150122.  
18 41. Mueller S, Saunier K, Hanisch C, Norin E, Alm L, Midtvedt T, et al. Differences in fecal  
19 microbiota in different European study populations in relation to age, gender, and  
20 country: a cross-sectional study. *Appl. Environ. Microbiol.* 2006;72(2):1027-33.  
21 42. Kaliannan K, Robertson RC, Murphy K, Stanton C, Kang C, Wang B, et al. Estrogen-  
22 mediated gut microbiome alterations influence sexual dimorphism in metabolic  
23 syndrome in mice. *Microbiome* 2018;6(1):205.  
24 43. Yurkovetskiy L, Burrows M, Khan AA, Graham L, Volchkov P, Becker L, et al. Gender bias  
25 in autoimmunity is influenced by microbiota. *Immunity* 2013;39(2):400-12.  
26 44. Ley RE, Backhed F, Turnbaugh P, Lozupone CA, Knight RD, Gordon JI. Obesity alters gut  
27 microbial ecology. *Proc. Natl. Acad. Sci. U. S. A* 2005;102(31):11070-5.  
28 45. Murphy EF, Cotter PD, Healy S, Marques TM, O'Sullivan O, Fouhy F, et al. Composition  
29 and energy harvesting capacity of the gut microbiota: relationship to diet, obesity and  
30 time in mouse models. *Gut* 2010;59(12):1635-42.  
31 46. Ley RE, Turnbaugh PJ, Klein S, Gordon JI. Microbial ecology: human gut microbes  
32 associated with obesity. *Nature* 2006;444(7122):1022-3.  
33 47. Turnbaugh PJ, Hamady M, Yatsunencko T, Cantarel BL, Duncan A, Ley RE, et al. A core gut  
34 microbiome in obese and lean twins. *Nature* 2009;457(7228):480-4.  
35 48. Le Chatelier E, Nielsen T, Qin J, Prifti E, Hildebrand F, Falony G, et al. Richness of human  
36 gut microbiome correlates with metabolic markers. *Nature* 2013;500(7464):541-6.  
37 49. Ravussin Y, Koren O, Spor A, LeDuc C, Gutman R, Stombaugh J, et al. Responses of gut  
38 microbiota to diet composition and weight loss in lean and obese mice. *Obesity (Silver  
39 Spring)* 2012;20(4):738-47.  
40 50. Camporez JP, Jornayvaz FR, Lee HY, Kanda S, Guigni BA, Kahn M, et al. Cellular  
41 mechanism by which estradiol protects female ovariectomized mice from high-fat diet-  
42 induced hepatic and muscle insulin resistance. *Endocrinology* 2013;154(3):1021-8.

1  
2  
3  
4  
5  
6  
7  
8  
9  
10  
11  
12  
13  
14  
15  
16  
17  
18  
19  
20  
21  
22  
23  
24  
25  
26  
27  
28  
29  
30  
31  
32  
33  
34  
35  
36  
37  
38  
39  
40  
41  
42  
43  
44  
45  
46  
47  
48  
49  
50  
51  
52  
53  
54  
55  
56  
57  
58  
59  
60  
61  
62  
63  
64  
65

1 51. Riant E, Waget A, Cogo H, Arnal JF, Burcelin R, Gourdy P. Estrogens protect against high-fat diet-induced insulin resistance and glucose intolerance in mice. *Endocrinology* 2009;150(5):2109-17.

2

3

4 52. Mamounis KJ, Hernandez MR, Margolies N, Yasrebi A, Roepke TA. Interaction of 17beta-estradiol and dietary fatty acids on energy and glucose homeostasis in female mice. *Nutr Neurosci* 2017:1-14.

5

6

7 53. Bryzgalova G, Lundholm L, Portwood N, Gustafsson JA, Khan A, Efendic S, et al. Mechanisms of antidiabetogenic and body weight-lowering effects of estrogen in high-fat diet-fed mice. *Am. J. Physiol. Endocrinol. Metab.* 2008;295(4):E904-12.

8

9

10 54. Gao Q, Horvath TL. Neurobiology of feeding and energy expenditure. *Annu. Rev. Neurosci.* 2007;30:367-98.

11

12 55. Tiano JP, Mauvais-Jarvis F. Molecular mechanisms of estrogen receptors' suppression of lipogenesis in pancreatic beta-cells. *Endocrinology* 2012;153(7):2997-3005.

13

14 56. Yasrebi A, Rivera JA, Krumm EA, Yang JA, Roepke TA. Activation of Estrogen Response Element-Independent ERalpha Signaling Protects Female Mice From Diet-Induced Obesity. *Endocrinology* 2017;158(2):319-34.

15

16 57. Ribas V, Drew BG, Zhou Z, Phun J, Kalajian NY, Soleymani T, et al. Skeletal muscle action of estrogen receptor  $\alpha$  is critical for the maintenance of mitochondrial function and metabolic homeostasis in females. *Sci Transl Med* 2016.

17

18 58. Campbell SE, Mehan KA, Tunstall RJ, Febbraio MA, Cameron-Smith D. 17beta-estradiol upregulates the expression of peroxisome proliferator-activated receptor and lipid oxidative genes in skeletal muscle. *J. Mol. Endocrinol.* 2003.

19

20 59. Gao H, Bryzgalova G, Hedman E, Khan A, Efendic S, Gustafsson JA, et al. Long-term administration of estradiol decreases expression of hepatic lipogenic genes and improves insulin sensitivity in ob/ob mice: a possible mechanism is through direct regulation of signal transducer and activator of transcription 3. *Mol Endocrinol* 2006;20(6):1287-99.

21

22 60. Benedek G, Zhang J, Nguyen H, Kent G, Seifert HA, Davin S, et al. Estrogen protection against EAE modulates the microbiota and mucosal-associated regulatory cells. *J. Neuroimmunol.* 2017;310:51-9.

23

24 61. Lozupone CA, Stombaugh JI, Gordon JI, Jansson JK, Knight R. Diversity, stability and resilience of the human gut microbiota. *Nature* 2012;489(7415):220-30.

25

26 62. Peters BA, Shapiro JA, Church TR, Miller G, Trinh-Shevrin C, Yuen E, et al. A taxonomic signature of obesity in a large study of American adults. *Sci Rep* 2018;8(1):9749.

27

28 63. Ormerod KL, Wood DL, Lachner N, Gellatly SL, Daly JN, Parsons JD, et al. Genomic characterization of the uncultured Bacteroidales family S24-7 inhabiting the guts of homeothermic animals. *Microbiome* 2016;4(1):36.

29

30 64. Chassard C, Bernalier-Donadille A. H<sub>2</sub> and acetate transfers during xylan fermentation between a butyrate-producing xylanolytic species and hydrogenotrophic microorganisms from the human gut. *FEMS Microbiol Lett* 2006;254(1):116-22.

31

32 65. Ríos-Covián D, Ruas-Madiedo P, Margolles A, Gueimonde M, de los Reyes-Gavilán CG, Salazar N. Intestinal Short Chain Fatty Acids and their Link with Diet and Human Health. *Front Microbiol* 2016;7.

1  
2  
3  
4  
5  
6  
7  
8  
9  
10  
11  
12  
13  
14  
15  
16  
17  
18  
19  
20  
21  
22  
23  
24  
25  
26  
27  
28  
29  
30  
31  
32  
33  
34  
35  
36  
37  
38  
39  
40  
41  
42  
43  
44  
45  
46  
47  
48  
49  
50  
51  
52  
53  
54  
55  
56  
57  
58  
59  
60  
61  
62  
63  
64  
65

1 66. Macfarlane GT, Macfarlane S. Bacteria, colonic fermentation, and gastrointestinal health. *J AOAC Int* 2012;95(1):50-60.

2

3 67. Krych L, Nielsen DS, Hansen AK, Hansen CH. Gut microbial markers are associated with diabetes onset, regulatory imbalance, and IFN-gamma level in NOD mice. *Gut Microbes* 2015;6(2):101-9.

4

5 68. Rooks MG, Veiga P, Wardwell-Scott LH, Tickle T, Segata N, Michaud M, et al. Gut microbiome composition and function in experimental colitis during active disease and treatment-induced remission. *ISME J* 2014;8(7):1403-17.

6

7 69. Morgan XC, Tickle TL, Sokol H, Gevers D, Devaney KL, Ward DV, et al. Dysfunction of the intestinal microbiome in inflammatory bowel disease and treatment. *Genome. Biol* 2012;13(9):R79.

8

9 70. Bäckhed F, Ding H, Wang T, Hooper LV, Koh GY, A. N, et al. The gut microbiota as an environmental factor that regulates fat storage. *Proc. Natl. Acad. Sci. U. S. A* 2004;101(44):15718-23.

10

11 71. Hildebrandt MA, Hoffmann C, Sherrill-Mix SA, Keilbaugh SA, Hamady M, Chen YY, et al. High-fat diet determines the composition of the murine gut microbiome independently of obesity. *Gastroenterology* 2009;137(5):1716-24 e1-2.

12

13 72. Zhang C, Zhang M, Pang X, Zhao Y, Wang L, Zhao L. Structural resilience of the gut microbiota in adult mice under high-fat dietary perturbations. *ISME J* 2012;6(10):1848-57.

14

15 73. Turnbaugh PJ, Ley RE, Mahowald MA, Magrini V, Mardis ER, Gordon JI. An obesity-associated gut microbiome with increased capacity for energy harvest. *Nature* 2006;444(7122):1027-31.

16

17 74. Semova I, Carten JD, Stombaugh J, Mackey LC, Knight R, Farber SA, et al. Microbiota regulate intestinal absorption and metabolism of fatty acids in the zebrafish. *Cell Host Microbe* 2012;12(3):277-88.

18

19 75. Barengolts E, Green SJ, Eisenberg Y, Akbar A, Reddivari B, Layden BT, et al. Gut microbiota varies by opioid use, circulating leptin and oxytocin in African American men with diabetes and high burden of chronic disease. *PLoS One* 2018;13(3):e0194171.

20

21 76. Christensen HR, Frokiaer H, Pestka JJ. Lactobacilli Differentially Modulate Expression of Cytokines and Maturation Surface Markers in Murine Dendritic Cells. *J. Immunol.* 2002;168(1):171-8.

22

23 77. Madsen KL, Doyle JS, Jewell LD, Tavernini MM, Fedorak RN. Lactobacillus species prevents colitis in interleukin 10 gene-deficient mice. *Gastroenterology* 1999;116(5):1107-14.

24

25 78. Lepage P, Hasler R, Spehlmann ME, Rehman A, Zvirbliene A, Begun A, et al. Twin study indicates loss of interaction between microbiota and mucosa of patients with ulcerative colitis. *Gastroenterology* 2011;141(1):227-36.

26

27 79. Martínez I, Perdicaro DJ, Brown AW, Susan Hammons S, Carden TJ, Carr TP, et al. Diet-Induced Alterations of Host Cholesterol Metabolism Are Likely To Affect the Gut Microbiota Composition in Hamsters. *Appl. Environ. Microbiol.* 2013.

28

29 80. Zhang H, DiBaise JK, Zuccoloco A, Kudrunc D, Braidotti M, Yuc Y, et al. Human gut microbiota in obesity and after gastric bypass. *Proc. Natl. Acad. Sci. U. S. A* 2009;106:2365-70.

30

31

32

33

34

35

36

37

38

39

40

41

42

43

44

45

46

47

48

49

50

51

52

53

54

55

56

57

58

59

60

61

62

63

64

65

1  
2  
3  
4  
5  
6  
7  
8  
9  
10  
11  
12  
13  
14  
15  
16  
17  
18  
19  
20  
21  
22  
23  
24  
25  
26  
27  
28  
29  
30  
31  
32  
33  
34  
35  
36  
37  
38  
39  
40  
41  
42  
43  
44  
45  
46  
47  
48  
49  
50  
51  
52  
53  
54  
55  
56  
57  
58  
59  
60  
61  
62  
63  
64  
65

1 81. Jensen EV, Suzuki T, Kawashima T, Stumpf WE, Jungblut PW, DeSombre ER. A two-step  
2 mechanism for the interaction of estradiol with rat uterus. *Proc. Natl. Acad. Sci. U. S. A*  
3 1968;59(2):632-8.

4 82. Kuiper GG, Enmark E, Peltö-Huikko M, Nilsson S, Gustafsson JA. Cloning of a novel  
5 receptor expressed in rat prostate and ovary. *Proc. Natl. Acad. Sci. U. S. A*  
6 1996;93(12):5925-30.

7 83. Tetel MJ, Pfaff DW. Contributions of estrogen receptor-alpha and estrogen receptor-ss  
8 to the regulation of behavior. *Biochim. Biophys. Acta.* 2010;1800(10):1084-9.

9 84. Mani SK, Oyola MG. Progesterone signaling mechanisms in brain and behavior. *Front*  
10 *Endocrinol (Lausanne)* 2012;3:7.

11 85. Frank A, Brown LM, Clegg DJ. The role of hypothalamic estrogen receptors in metabolic  
12 regulation. *Front Neuroendocrinol* 2014;35(4):550-7.

13 86. Qiu J, Bosch MA, Tobias SC, Krust A, Graham SM, Murphy SJ, et al. A G-protein-coupled  
14 estrogen receptor is involved in hypothalamic control of energy homeostasis. *J. Neurosci.*  
15 2006;26(21):5649-55.

16 87. Park CJ, Zhao Z, Glidewell-Kenney C, Lazic M, Chambon P, Krust A, et al. Genetic rescue  
17 of nonclassical ERalpha signaling normalizes energy balance in obese ERalpha-null  
18 mutant mice. *J Clin Invest* 2011;121(2):604-12.

19 88. Santollo J, Katzenellenbogen BS, Katzenellenbogen JA, Eckel LA. Activation of ERalpha is  
20 necessary for estradiol's anorexigenic effect in female rats. *Horm. Behav*  
21 2010;58(5):872-7.

22 89. Santollo J, Wiley MD, Eckel LA. Acute activation of ER alpha decreases food intake, meal  
23 size, and body weight in ovariectomized rats. *Am. J. Physiol. Regul. Integr. Comp. Physiol.*  
24 2007;293(6):R2194-201.

25 90. Heine PA, Taylor JA, Iwamoto GA, Lubahn DB, Cooke PS. Increased adipose tissue in  
26 male and female estrogen receptor-alpha knockout mice. *Proc. Natl. Acad. Sci. U. S. A*  
27 2000;97(23):12729-34.

28 91. Menon R, Watson SE, Thomas LN, Allred CD, Dabney A, Azcarate-Peril MA, et al. Diet  
29 complexity and estrogen receptor beta status affect the composition of the murine  
30 intestinal microbiota. *Appl. Environ. Microbiol.* 2013;79(18):5763-73.

31 92. Enmark E, Peltö-Huikko M, Grandien K, Lagercrantz S, Lagercrantz J, Fried G, et al.  
32 Human estrogen receptor beta-gene structure, chromosomal localization, and  
33 expression pattern. *J Clin Endocrinol Metab* 1997;82(12):4258-65.

34 93. Campbell-Thompson M, Lynch IJ, Bhardwaj B. Expression of estrogen receptor (ER)  
35 subtypes and ERbeta isoforms in colon cancer. *Cancer Res* 2011.

36 94. McIntosh FM, Maison N, Holtrop G, Young P, Stevens VJ, Ince J, et al. Phylogenetic  
37 distribution of genes encoding beta-glucuronidase activity in human colonic bacteria  
38 and the impact of diet on faecal glycosidase activities. *Environ. Microbiol.*  
39 2012;14(8):1876-87.

40 95. Kwa M, Plottel CS, Blaser MJ, Adams S. The Intestinal Microbiome and Estrogen  
41 Receptor-Positive Female Breast Cancer. *J. Natl. Cancer. Inst.* 2016;108(8).

42 96. Flores R, Shi J, Fuhrman B, Xu X, Veenstra TD, Gail MH, et al. Fecal microbial  
43 determinants of fecal and systemic estrogens and estrogen metabolites: a cross-  
44 sectional study. *J Transl Med* 2012;10:253.



1  
2  
3  
4  
5  
6  
7  
8  
9  
10  
11  
12  
13  
14  
15  
16  
17  
18  
19  
20  
21  
22  
23  
24  
25  
26  
27  
28  
29  
30  
31  
32  
33  
34  
35  
36  
37  
38  
39  
40  
41  
42  
43  
44  
45  
46  
47  
48  
49  
50  
51  
52  
53  
54  
55  
56  
57  
58  
59  
60  
61  
62  
63  
64  
65

1 97. Cani PD, Bibiloni R, Knauf C, Waget A, Neyrinck AM, Delzenne NM, et al. Changes in gut  
2 microbiota control metabolic endotoxemia-induced inflammation in high-fat diet-  
3 induced obesity and diabetes in mice. *Diabetes* 2008;57(6):1470-81.  
4 98. Cani PD, Amar J, Iglesias MA, Poggi M, Knauf C, Bastelica D, et al. Metabolic  
5 endotoxemia initiates obesity and insulin resistance. *Diabetes* 2007;56(7):1761-72.  
6 99. Blasco-Baque V, Serino M, Vergnes JN, Riant E, Loubieres P, Arnal JF, et al. High-fat diet  
7 induces periodontitis in mice through lipopolysaccharides (LPS) receptor signaling:  
8 protective action of estrogens. *PLoS One* 2012;7(11):e48220.  
9 100. Rajala MW, Patterson CM, Opp JS, Foltin SK, Young VB, Myers MG, Jr. Leptin acts  
10 independently of food intake to modulate gut microbial composition in male mice.  
11 *Endocrinology* 2014;155(3):748-57.  
12 101. Ng KY, Yong J, Chakraborty TR. Estrous cycle in ob/ob and ovariectomized female mice  
13 and its relation with estrogen and leptin. *Physiol. Behav* 2010;99(1):125-30.  
14 102. Chung WK, Belfi K, Chua M, Wiley J, Mackintosh RD, Nicolson M, et al. Heterozygosity  
15 for Lepob or Leprdb affects body composition and leptin homeostasis in adult mice. *Am.*  
16 *J. Physiol.* 1998.  
17 103. Caporaso JG, Lauber CL, Walters WA, Berg-Lyons D, Lozupone CA, Turnbaugh PJ, et al.  
18 Global patterns of 16S rRNA diversity at a depth of millions of sequences per sample.  
19 *Proc. Natl. Acad. Sci. U. S. A* 2011;108 Suppl 1:4516-22.  
20 104. Chen X, Johnson S, Jeraldo P, Wang J, Chia N, Kocher JA, et al. Hybrid-denovo: a de novo  
21 OTU-picking pipeline integrating single-end and paired-end 16S sequence tags.  
22 *Gigascience* 2018;7(3):1-7.  
23 105. Cole JR, Wang Q, Fish JA, Chai B, McGarrell DM, Sun Y, et al. Ribosomal Database Project:  
24 data and tools for high throughput rRNA analysis. *Nucleic Acids Res.* 2014;42(Database  
25 issue):D633-42.  
26 106. Price MN, Dehal PS, Arkin AP. FastTree: computing large minimum evolution trees with  
27 profiles instead of a distance matrix. *Mol. Biol. Evol.* 2009;26(7):1641-50.  
28 107. Pielou EC. The measurement of diversity in different types of biological collections. *J.*  
29 *Theor. Biol.* 1966;13:131-44.  
30 108. McArdle BH, Anderson MJ. Fitting multivariate models to community data: a comment  
31 on distance-based redundancy analysis. *Ecology* 2001;82(1):290-7.  
32 109. Chen J, Toyomasu Y, Hayashi Y, Linden DR, Szurszewski JH, Nelson H, et al. Altered gut  
33 microbiota in female mice with persistent low body weights following removal of post-  
34 weaning chronic dietary restriction. *Genome Med* 2016;8(1):103.  
35 110. Chen L, Reeve J, Zhang L, Huang S, Wang X, Chen J. GMPR: A robust normalization  
36 method for zero-inflated count data with application to microbiome sequencing data.  
37 *PeerJ* 2018;6:e4600.  
38 111. Benjamini Y, Hochberg Y. Controlling the False Discovery Rate: A Practical and Powerful  
39 Approach to Multiple Testing. *J R Statist Soc. B (Methodological)* 1995;57:289-300.  
40 112. Asnicar F, Weingart G, Tickle TL, Huttenhower C, Segata N. Compact graphical  
41 representation of phylogenetic data and metadata with GraPhlAn. *PeerJ* 2015;3:e1029.  
42

Figure 1

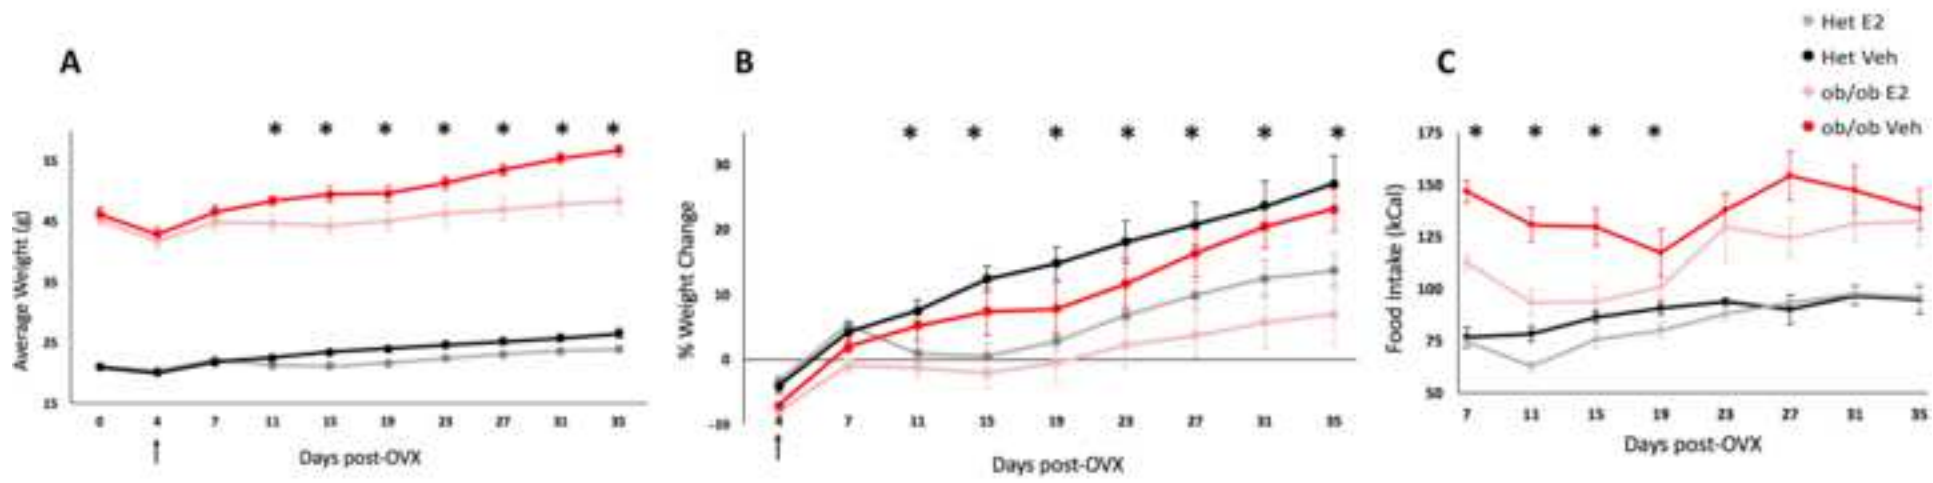

Figure 2

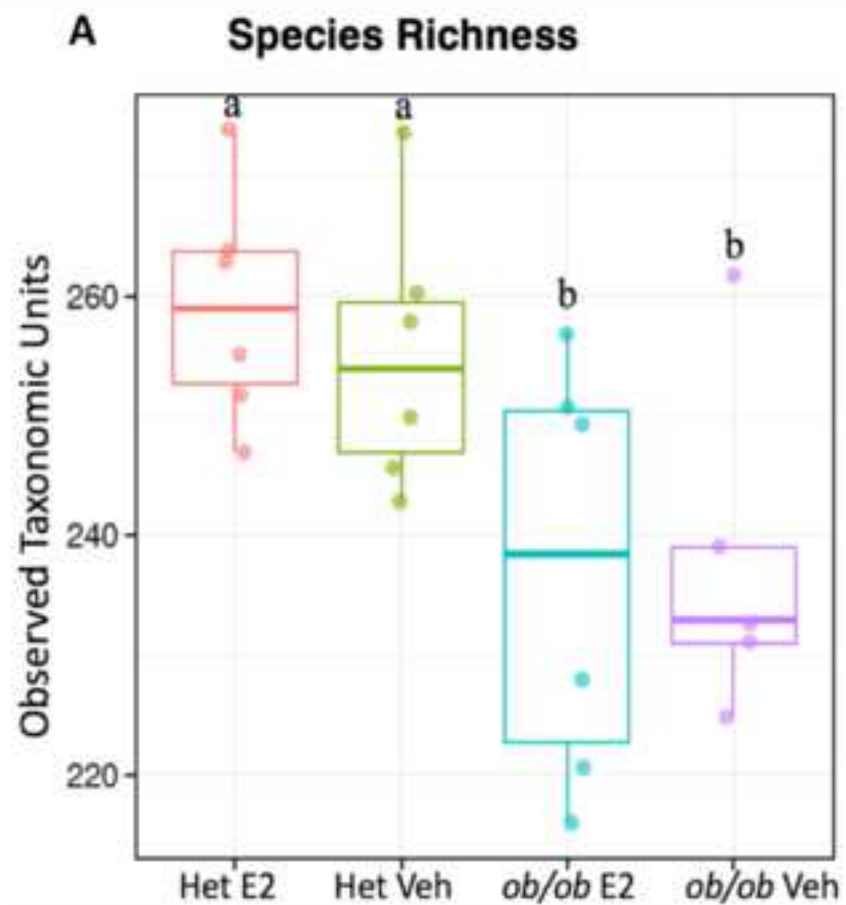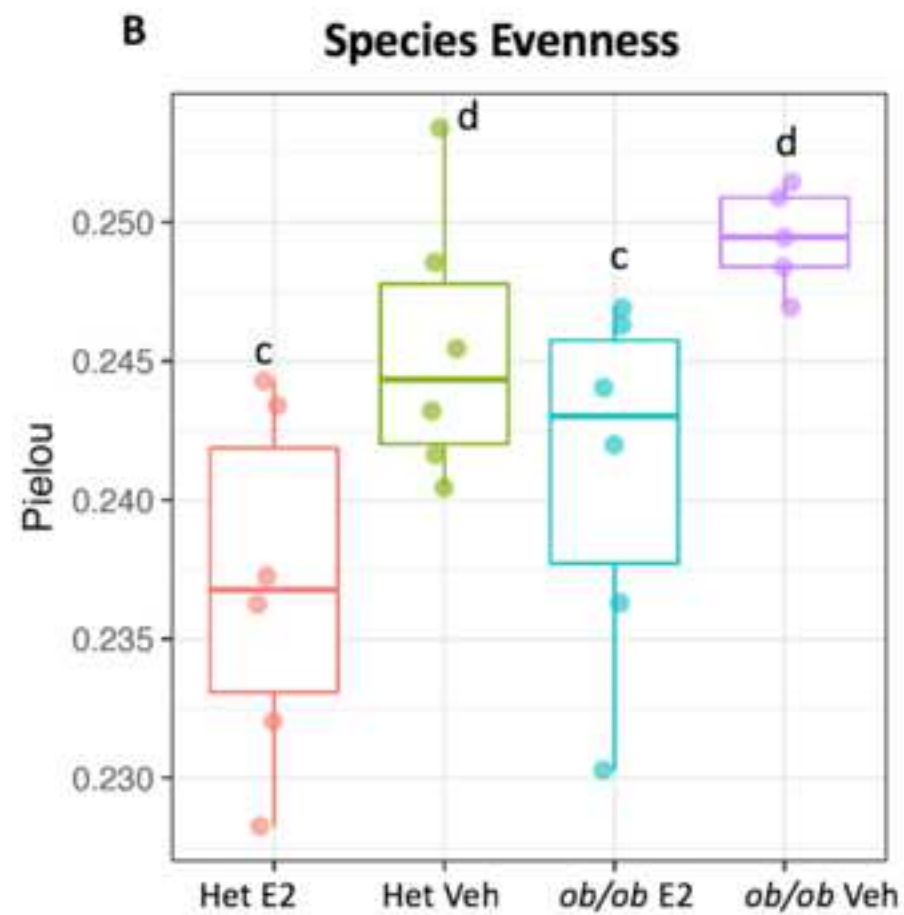

Figure 3

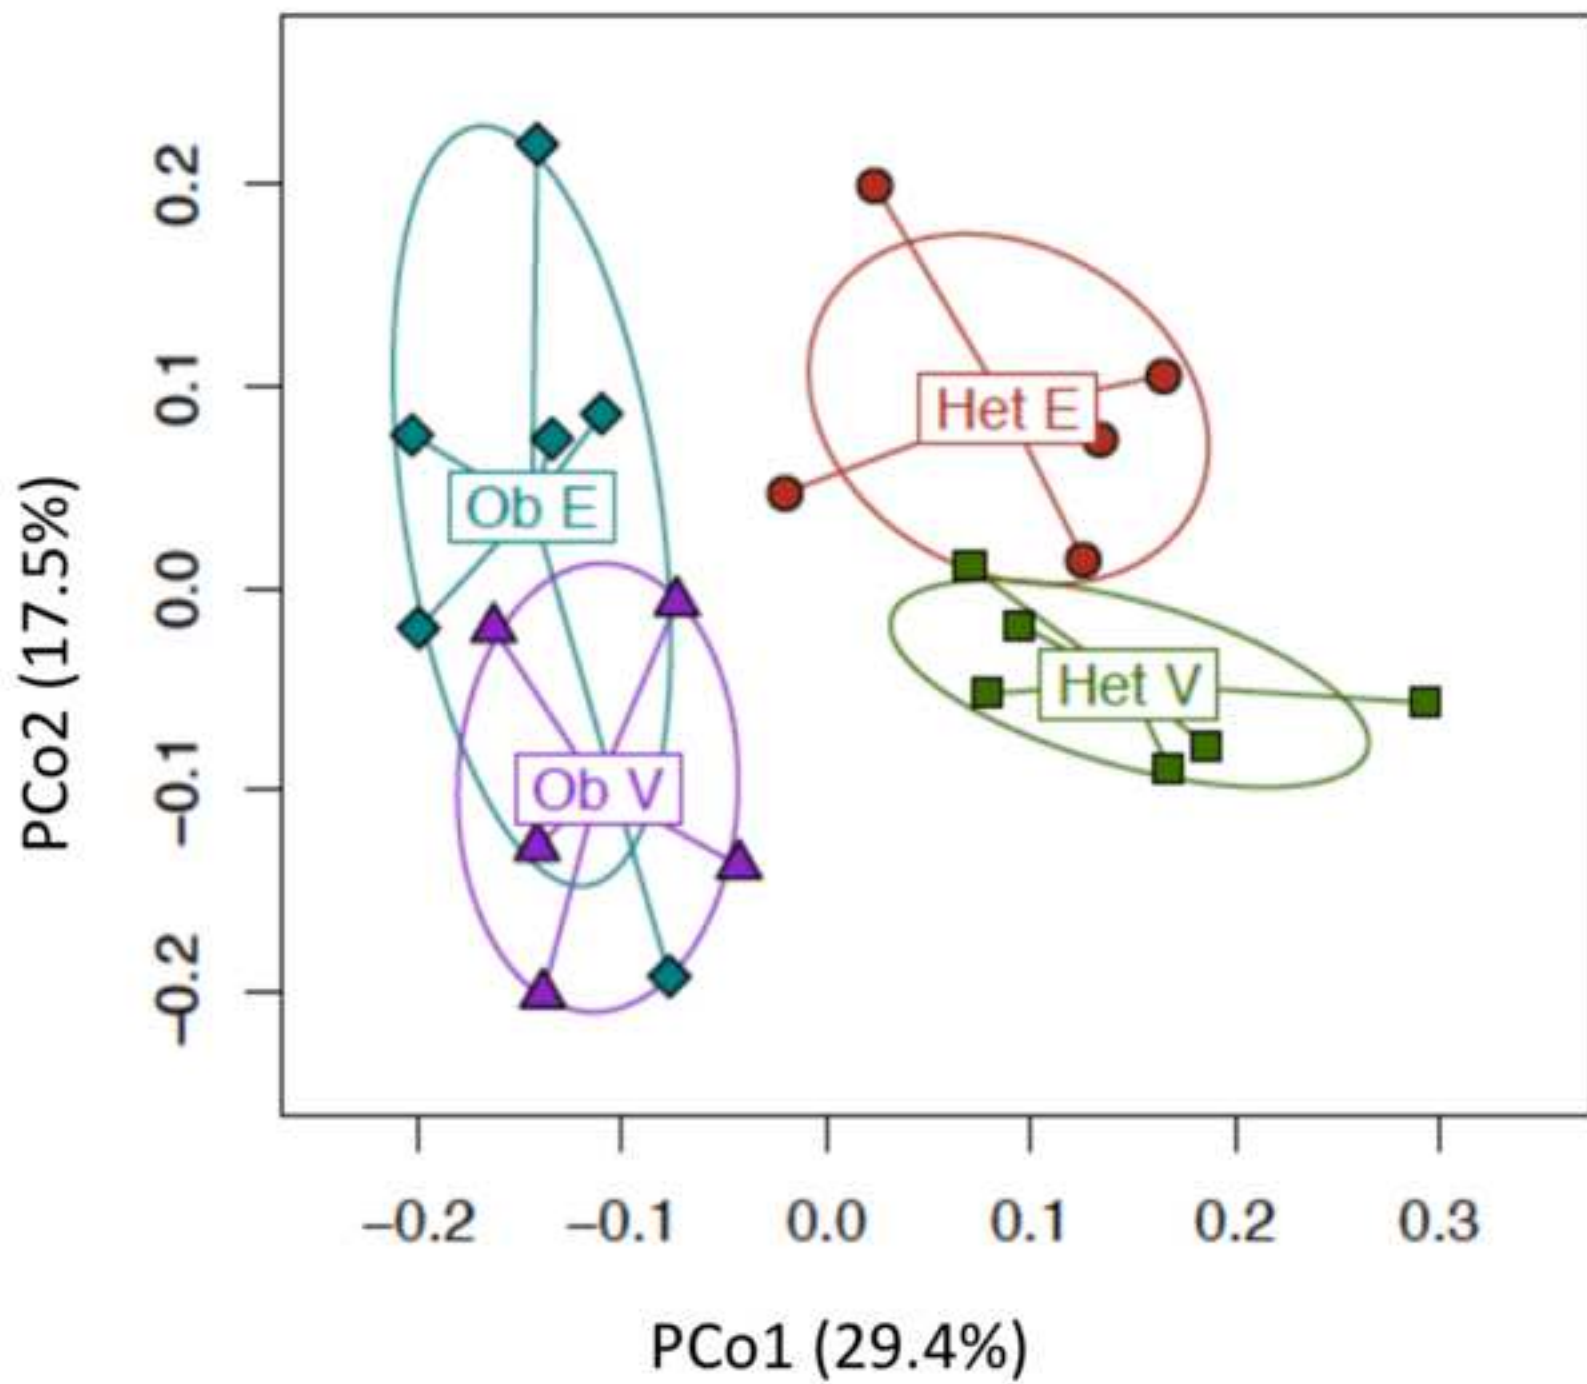

Figure 4

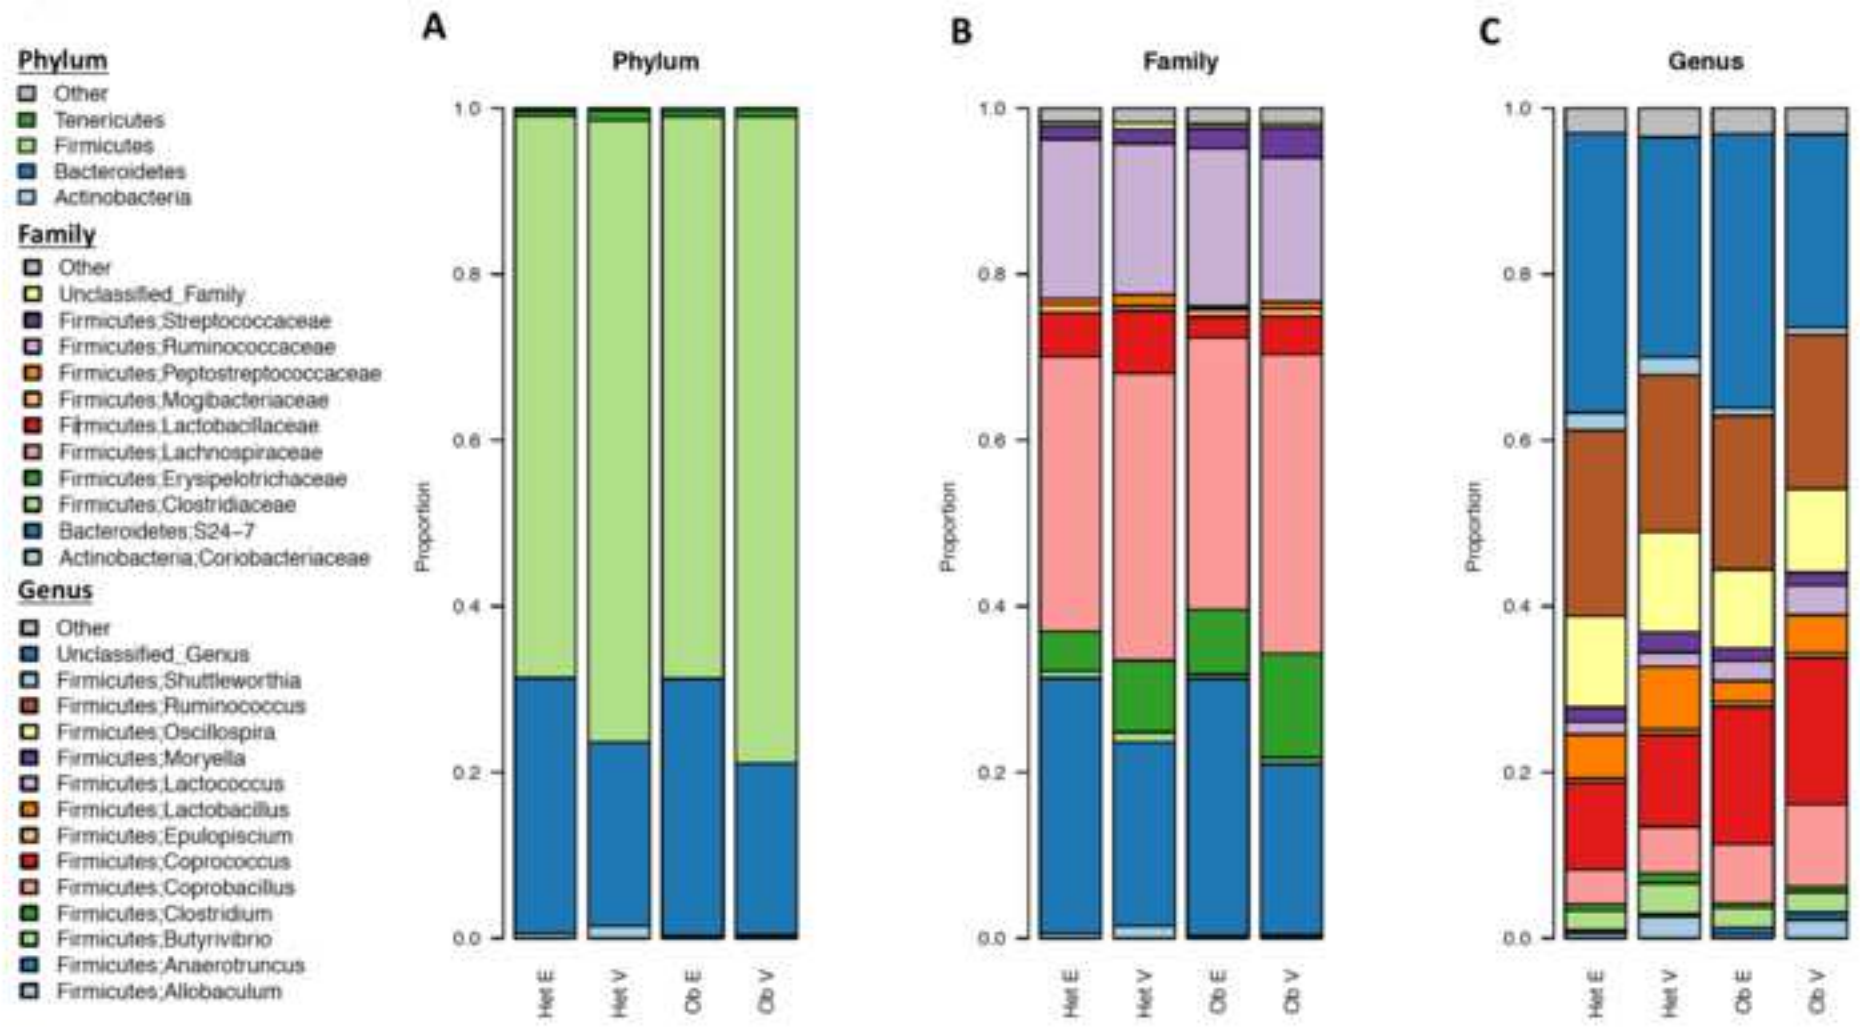

Figure 5

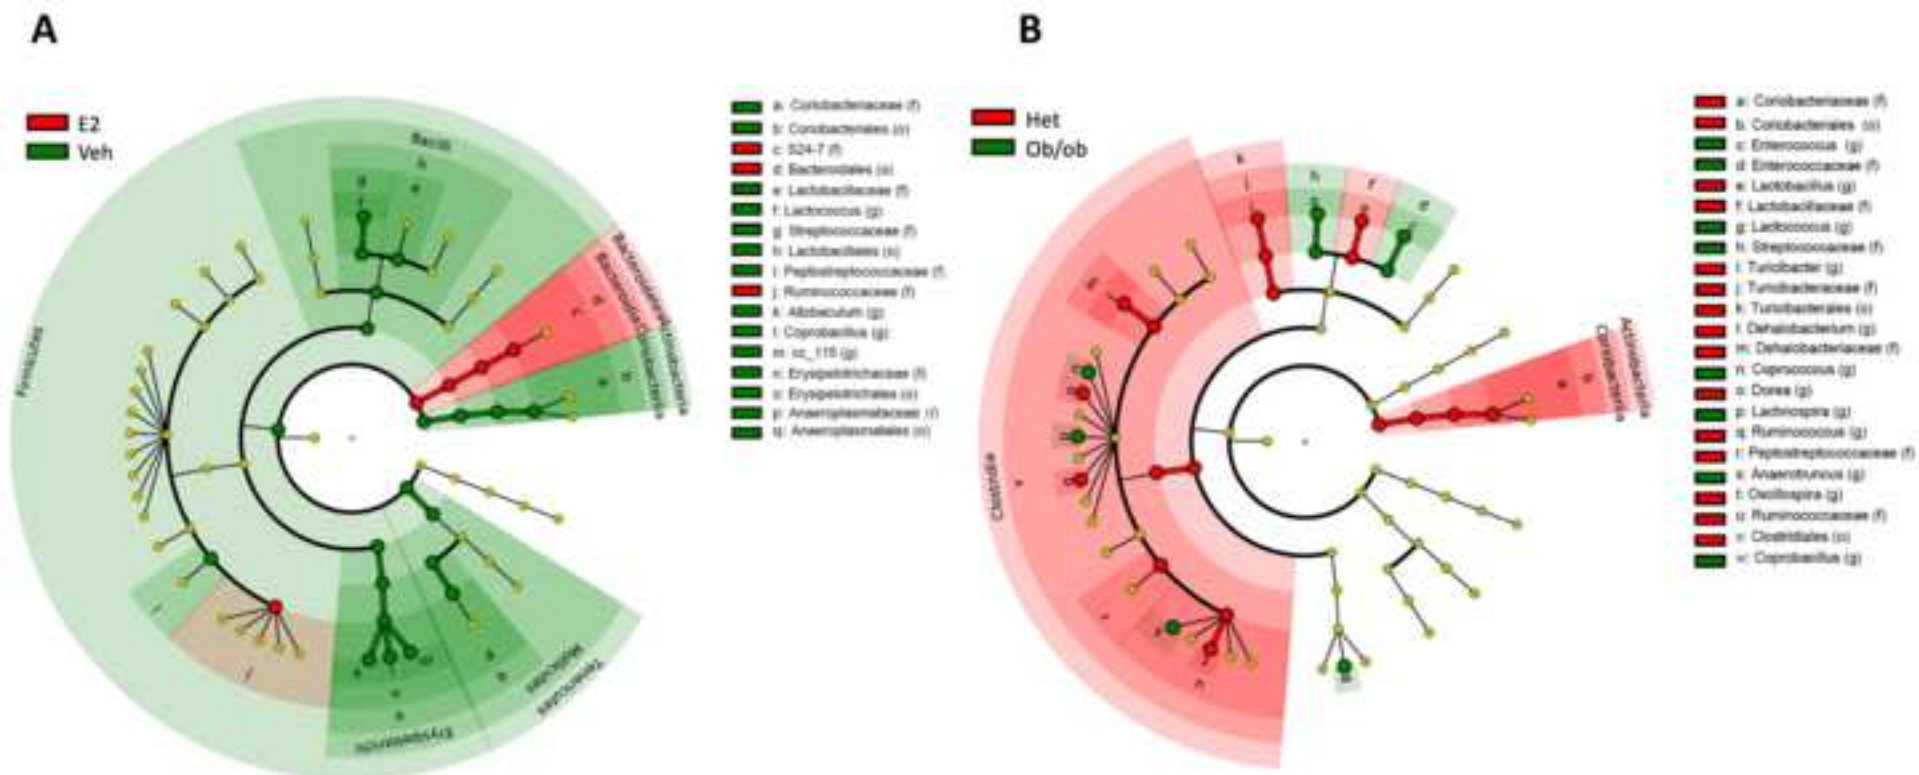

Figure 6

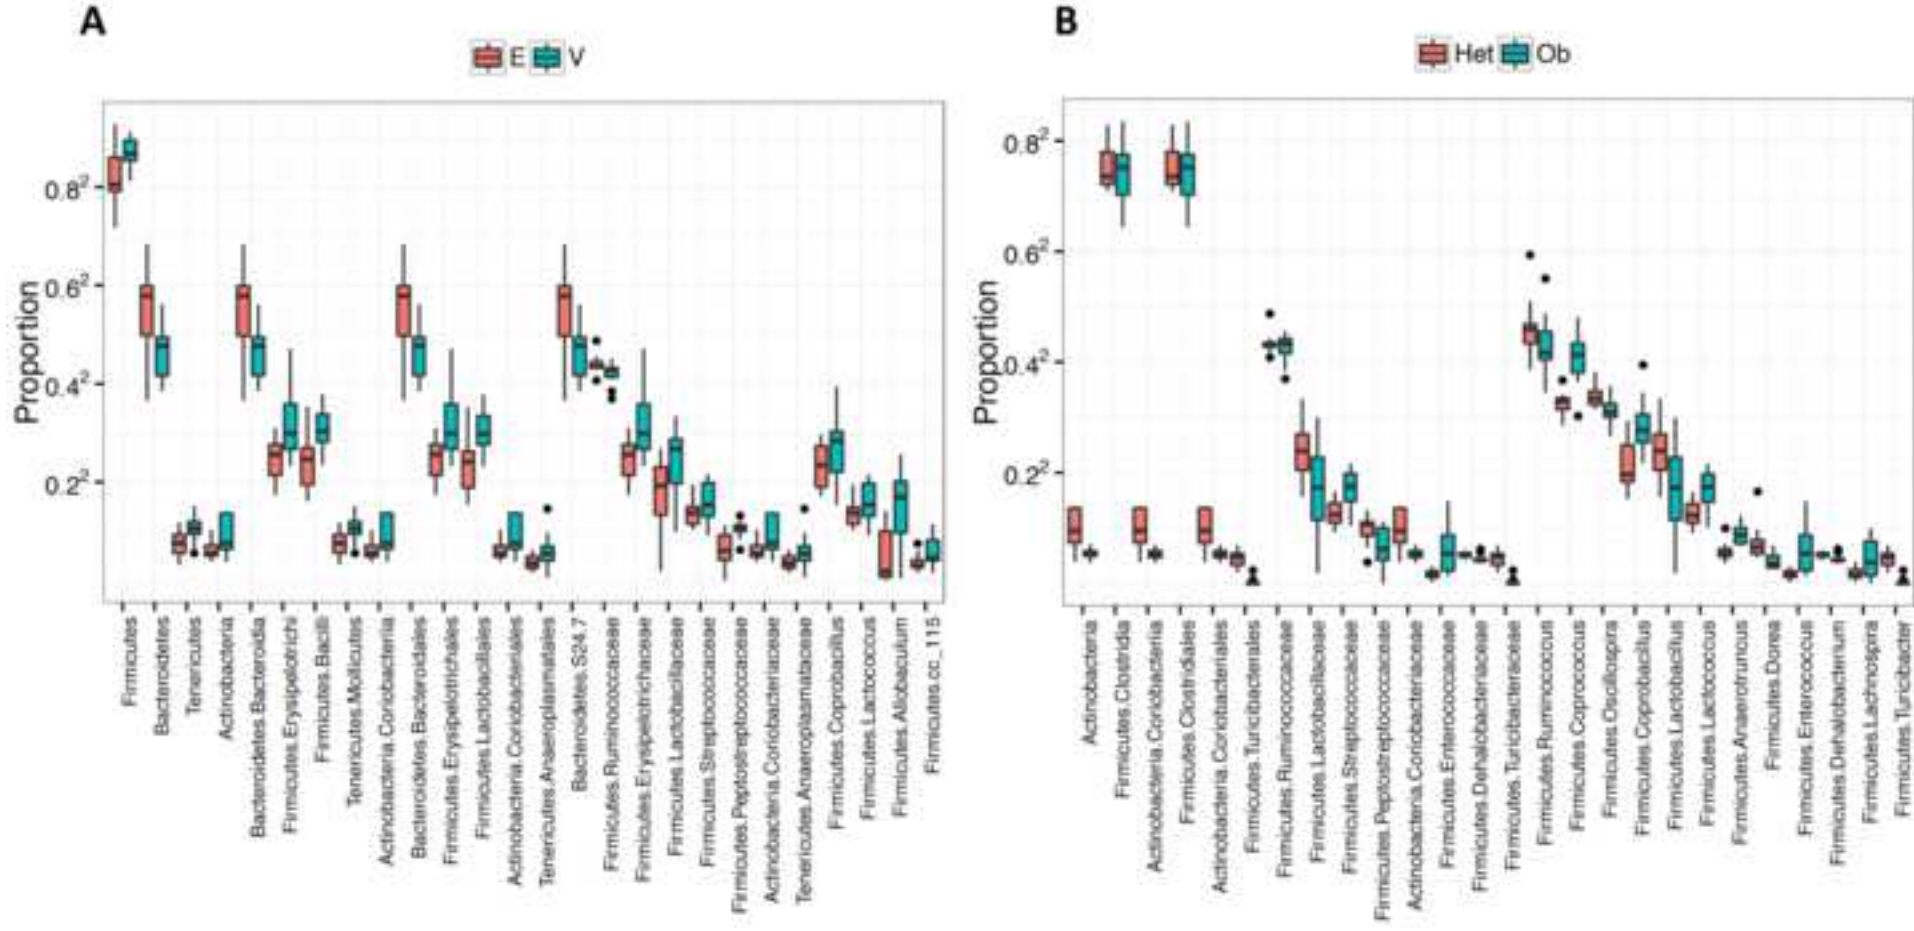

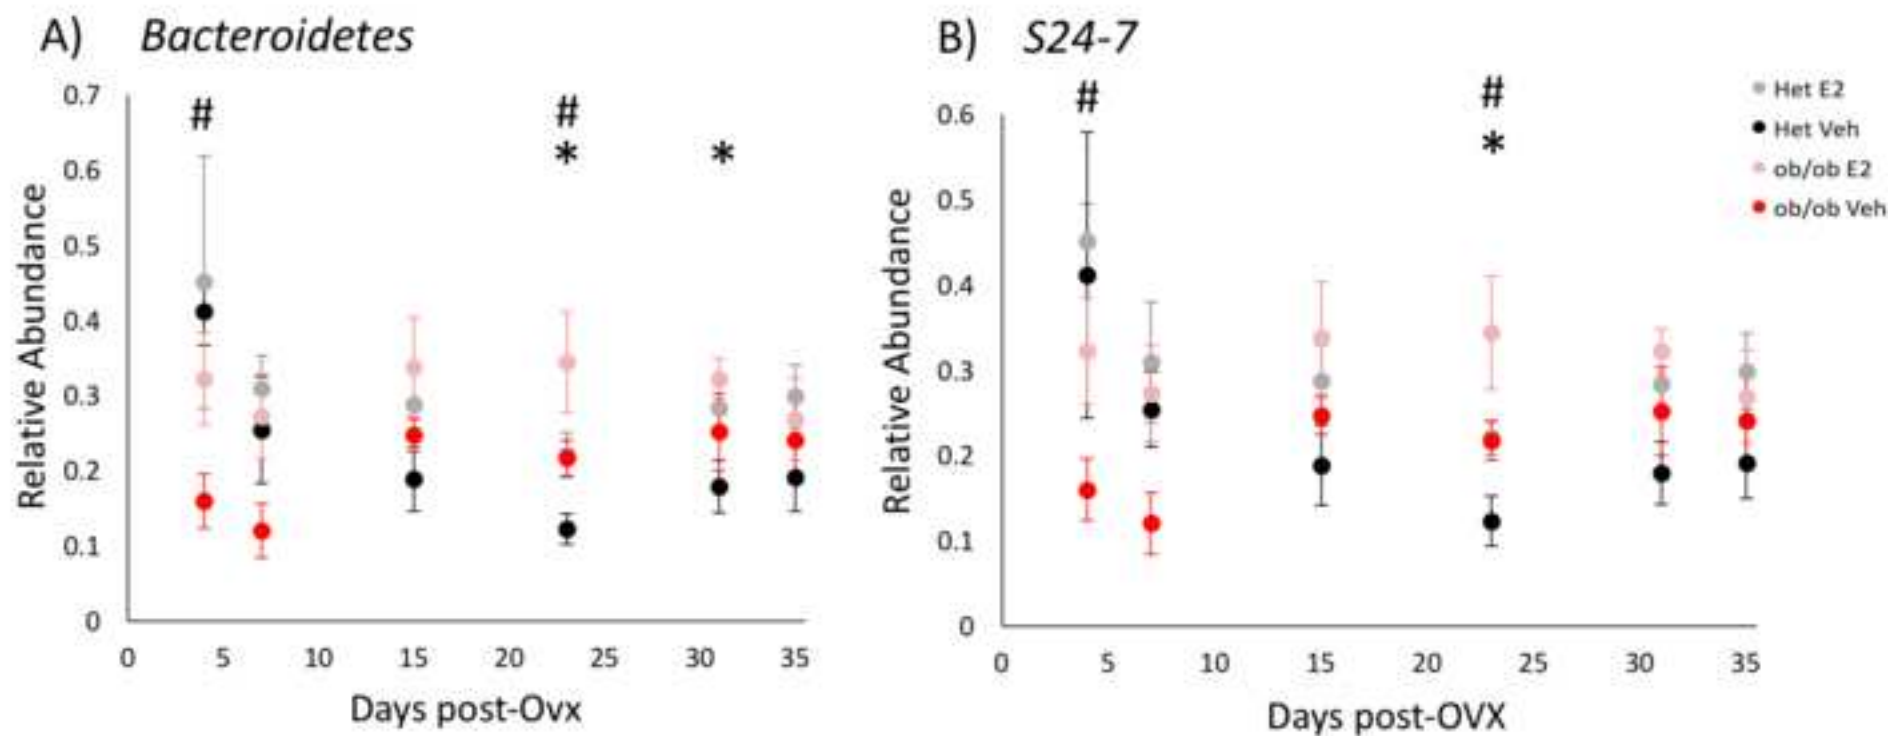



A) *Firmicutes*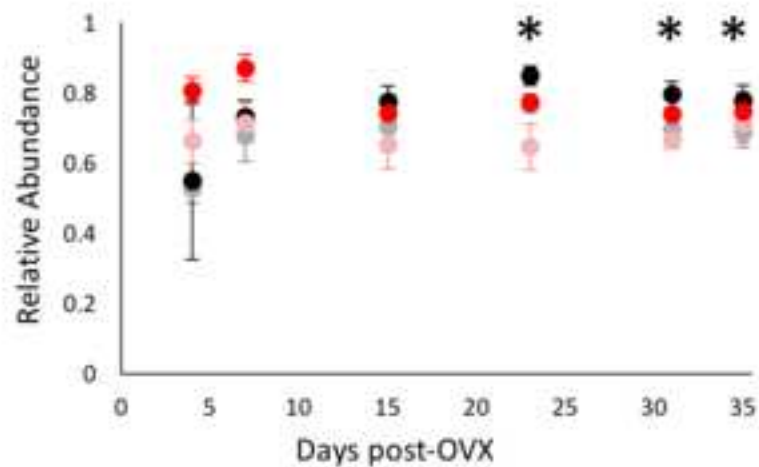B) *Clostridium*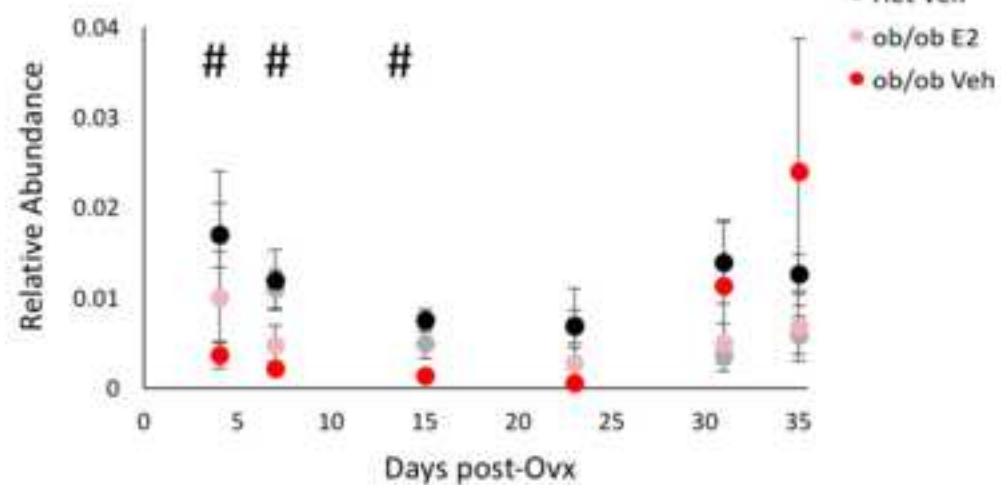C) *Lactobacillus*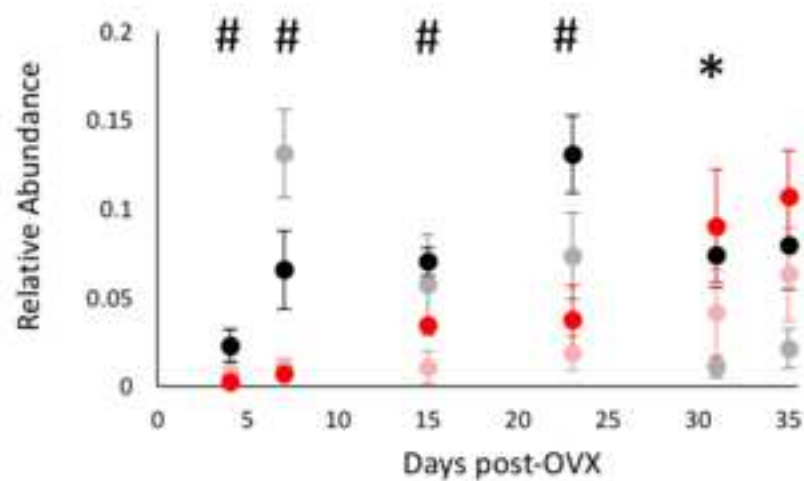D) *Lactococcus*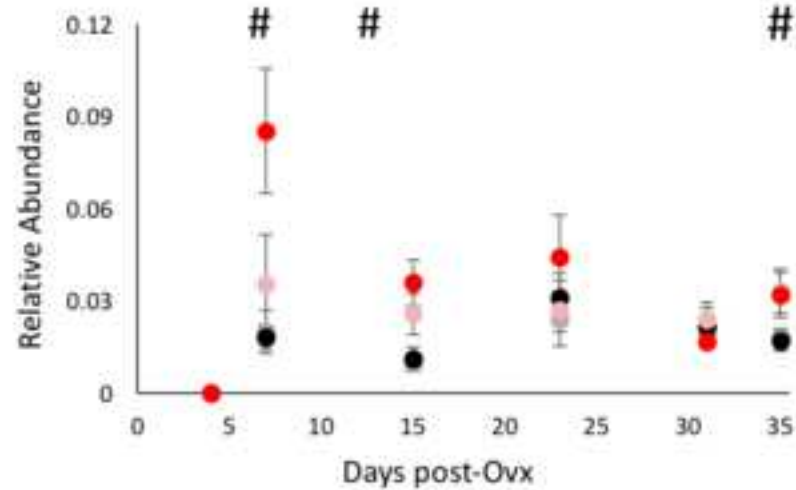

A) *Actinobacteria*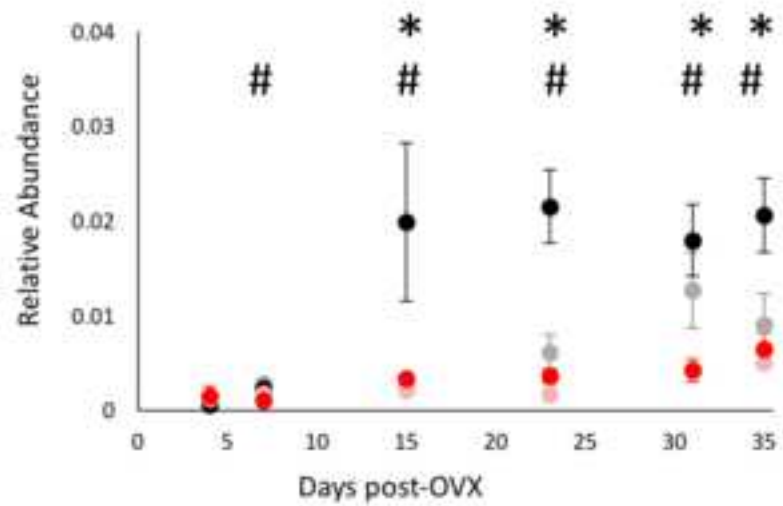B) *Coriobacteriaceae*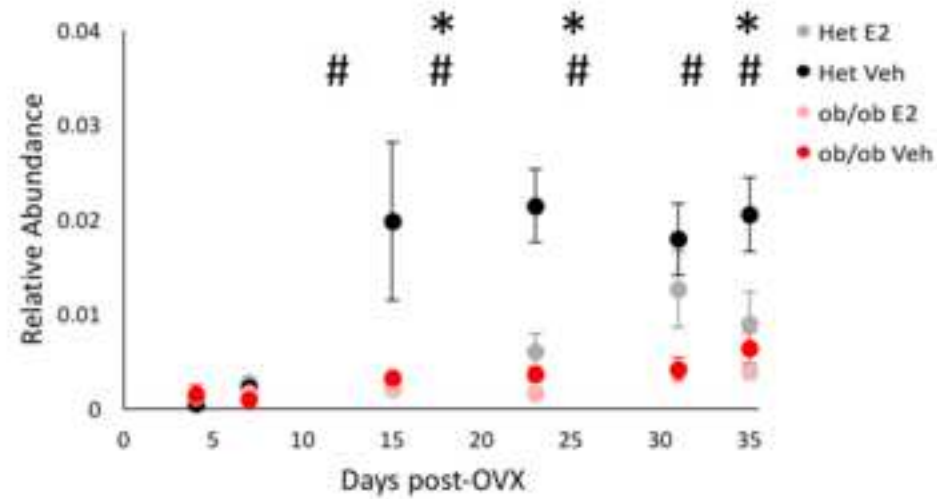

**Table 1. PERMANOVA P-values for individual days based on Bray-Curtis Distance**

| Day              | Day 4 | Day 7  | Day 15 | Day 23 | Day 31 | Day 35 |
|------------------|-------|--------|--------|--------|--------|--------|
| <b>Treatment</b> | 0.095 | 0.234  | 0.011* | 0.044* | 0.023* | 0.022* |
| <b>Genotype</b>  | 0.081 | 0.004* | 0.009* | 0.001* | 0.06   | 0.011* |

\* indicate a p-value of <0.05.

**Supplemental Table 1:** Changes in taxa relative abundances across days as an effect of estradi

|                     | DAY 4   |                         |                     |           | DAY 7   |                         |
|---------------------|---------|-------------------------|---------------------|-----------|---------|-------------------------|
|                     | q-value | Fold change<br>(Veh/E2) | Confidence Interval |           | q-value | Fold change<br>(Veh/E2) |
|                     |         |                         | 2.5%                | 97.5%     |         |                         |
| <b>Firmicutes</b>   | 0.719   | 0.624                   | -1.066              | 2.313     | 0.629   | 0.049                   |
| Bacilli             | 0.700   | -0.298                  | -0.953              | 0.358     | 0.891   | -0.098                  |
| Bacillales          | 0.896   | -0.208                  | -0.752              | 0.336     | 0.795   | -0.273                  |
| Bacillaceae         | 0.997   | 0.008                   | -0.495              | 0.512     | 0.873   | -0.221                  |
| Bacillus            | 0.998   | 0.008                   | -0.495              | 0.512     | 0.957   | -0.219                  |
| Lysinibacillus      | 0.998   | -1.049                  | -4.481              | 2.383     | 0.998   | -18.618                 |
| Planococcaceae      | 0.997   | -1.049                  | -4.481              | 2.383     | 0.998   | -18.618                 |
| Staphylococcaceae   | 0.773   | -2.093                  | -5.859              | 1.673     | 0.432   | -1.926                  |
| Staphylococcus      | 0.811   | -2.093                  | -5.859              | 1.673     | 0.448   | -1.926                  |
| Lactobacillales     | 0.734   | -0.505                  | -1.314              | 0.304     | 0.998   | -0.064                  |
| Lactobacillaceae    | 0.773   | -0.465                  | -1.261              | 0.330     | 0.343   | -0.620                  |
| Lactobacillus       | 0.788   | -0.465                  | -1.261              | 0.330     | 0.448   | -0.620                  |
| Mogibacteriaceae    | 0.773   | -0.430                  | -1.240              | 0.380     | 0.873   | 0.297                   |
| Streptococcaceae    | 0.773   | 0.624                   | -0.300              | 1.548     | 0.432   | 0.533                   |
| Lactococcus         | 0.593   | 1.661                   | -0.237              | 3.559     | 0.448   | 0.532                   |
| Streptococcus       | 0.828   | 0.510                   | -0.453              | 1.472     | 0.448   | 0.614                   |
| Enterococcaceae     | 0.773   | -2.195                  | -4.817              | 0.427     | 0.407   | 1.621                   |
| Enterococcus        | 0.593   | -2.195                  | -4.817              | 0.427     | 0.448   | 1.621                   |
| Clostridia          | 0.700   | 0.048                   | -0.048              | 0.145     | 0.757   | 0.052                   |
| Clostridiales       | 0.844   | 0.048                   | -0.048              | 0.145     | 0.795   | 0.052                   |
| Epulopiscium        | 0.659   | -0.460                  | -1.114              | 0.194     | 0.957   | -0.152                  |
| Christensenellaceae | 0.997   | -0.181                  | -0.959              | 0.597     | 0.432   | -1.086                  |
| Christensenella     | 0.998   | -0.182                  | -0.976              | 0.612     | 0.448   | -1.075                  |
| Clostridiaceae      | 0.997   | -0.119                  | -0.956              | 0.718     | 0.873   | -0.179                  |
| Anaerotruncus       | 0.998   | 0.119                   | -0.396              | 0.634     | 0.998   | 0.094                   |
| Faecalibacterium    | 0.998   | 19.499                  | -12900.395          | 12939.393 | 0.998   | -18.977                 |
| Lachnospiraceae     | 0.773   | 0.120                   | -0.031              | 0.271     | 0.873   | 0.054                   |
| Anaerostipes        | 0.998   | -0.460                  | -2.095              | 1.175     | 0.448   | -2.294                  |
| Blautia             | 0.929   | -1.049                  | -3.276              | 1.178     | 0.998   | -0.270                  |
| Butyrivibrio        | 0.593   | 0.361                   | -0.016              | 0.738     | 0.957   | 0.172                   |
| Clostridium         | 0.998   | -0.106                  | -0.889              | 0.677     | 0.957   | -0.211                  |
| Coprococcus         | 0.998   | 0.052                   | -0.168              | 0.272     | 0.885   | -0.143                  |
| Dorea               | 0.998   | -0.260                  | -1.011              | 0.491     | 0.957   | 0.176                   |
| Lachnospira         | 0.593   | -0.781                  | -1.706              | 0.143     | 0.998   | 0.182                   |
| Moryella            | 0.998   | 0.141                   | -0.465              | 0.747     | 0.998   | 0.087                   |

|                     |       |         |            |           |       |         |
|---------------------|-------|---------|------------|-----------|-------|---------|
| Oribacterium        | 0.593 | 1.385   | 0.090      | 2.680     | 0.957 | -0.276  |
| Roseburia           | 0.998 | -0.708  | -2.542     | 1.126     | 0.464 | -1.550  |
| Shuttleworthia      | 0.998 | -0.043  | -0.733     | 0.647     | 0.998 | 0.108   |
| Peptostreptococcace | 0.997 | -0.211  | -2.209     | 1.786     | 0.936 | 0.204   |
| Ruminococcaceae     | 0.773 | -0.114  | -0.330     | 0.101     | 0.873 | 0.075   |
| Ruminococcus        | 0.998 | -0.003  | -0.182     | 0.177     | 0.931 | 0.105   |
| Ethanoligenens      | 0.619 | -1.290  | -2.909     | 0.329     | 0.448 | 0.847   |
| Oscillospira        | 0.998 | -0.008  | -0.195     | 0.180     | 0.885 | 0.088   |
| Erysipelotrichi     | 0.873 | -0.156  | -0.709     | 0.398     | 0.655 | 0.512   |
| Erysipelotrichales  | 0.996 | -0.156  | -0.709     | 0.398     | 0.576 | 0.512   |
| Erysipelotrichaceae | 0.997 | -0.156  | -0.709     | 0.398     | 0.454 | 0.512   |
| Allobaculum         | 0.998 | -0.646  | -2.821     | 1.530     | 0.885 | -0.963  |
| Coprobacillus       | 0.593 | -0.744  | -1.590     | 0.101     | 0.621 | 0.433   |
| Turicibacter        | 0.780 | 0.640   | -0.410     | 1.690     | 0.448 | -0.709  |
| cc_115              | 0.641 | 0.504   | -0.166     | 1.173     | 0.448 | 1.227   |
| Turicibacteraceae   | 0.773 | 0.640   | -0.410     | 1.690     | 0.432 | -0.709  |
| Turicibacterales    | 0.734 | 0.640   | -0.410     | 1.690     | 0.576 | -0.709  |
| Dehalobacteriaceae  | 0.773 | -0.251  | -0.592     | 0.091     | 0.998 | -0.052  |
| Dehalobacterium     | 0.641 | -0.251  | -0.592     | 0.091     | 0.998 | -0.052  |
| Candidatus_Arthrom  | 0.998 | -2.345  | -7.870     | 3.181     | 0.998 | 0.453   |
| SMB53               | 0.998 | -19.367 | -11221.152 | 11182.418 |       |         |
| Paenibacillaceae    | 0.997 | -18.935 | -7296.780  | 7258.910  |       |         |
| Paenibacillus       | 0.998 | -18.935 | -7296.780  | 7258.910  |       |         |
| Geobacillus         |       |         |            |           |       |         |
| <b>Bacteriodes</b>  | 0.397 | -0.366  | -0.897     | 0.165     | 0.503 | -0.438  |
| Bacteriodia         | 0.530 | -0.366  | -0.897     | 0.165     | 0.655 | -0.439  |
| Bacteroidales       | 0.734 | -0.366  | -0.897     | 0.165     | 0.576 | -0.439  |
| S24-7               | 0.773 | -0.366  | -0.897     | 0.165     | 0.432 | -0.439  |
| Cytophagia          | 0.996 | 0.033   | -0.955     | 1.022     | 0.957 | 0.156   |
| Cytophagales        | 0.996 | 0.033   | -0.955     | 1.022     | 0.998 | 0.156   |
| Flammeovirgaceae    | 0.997 | 0.033   | -0.955     | 1.022     | 0.998 | 0.156   |
| Persicobacter       | 0.998 | 0.033   | -0.955     | 1.022     | 0.998 | 0.156   |
| <b>Tenericutes</b>  | 0.371 | 0.711   | -0.091     | 1.514     | 0.957 | -0.021  |
| Mollicutes          | 0.530 | 0.711   | -0.091     | 1.514     | 0.957 | -0.021  |
| Acholeplasmatales   | 0.996 | -18.733 | -5100.110  | 5062.644  | 0.998 | -19.309 |
| Acholeplasmataceae  | 0.997 | -18.733 | -5100.110  | 5062.644  | 0.998 | -19.309 |
| Candidatus_Phytopla | 0.998 | -18.733 | -5100.110  | 5062.644  | 0.998 | -19.309 |
| Anaeroplasmatales   | 0.734 | 0.971   | -0.001     | 1.943     | 0.652 | 0.560   |
| Anaeroplasmataceae  | 0.773 | 0.971   | -0.001     | 1.943     | 0.699 | 0.560   |
| Anaeroplasma        | 0.593 | 0.971   | -0.001     | 1.943     | 0.756 | 0.560   |
| RF39                | 0.844 | 0.421   | -0.483     | 1.324     | 0.947 | -0.238  |
| Unclassified_Family | 0.848 | 0.418   | -0.469     | 1.306     | 0.873 | -0.251  |
| Unclassified_Genus  | 0.664 | -0.345  | -0.853     | 0.163     | 0.448 | -0.407  |

|                        |       |         |            |           |       |         |
|------------------------|-------|---------|------------|-----------|-------|---------|
| Anaeroplasmatales      |       |         |            |           |       |         |
| <b>Verrucomicrobia</b> | 0.371 | -1.916  | -3.995     | 0.163     | 0.503 | -5.468  |
| Verrucomicrobiae       | 0.530 | -1.916  | -3.995     | 0.163     | 0.655 | -5.468  |
| Verrucomicrobiales     | 0.734 | -1.916  | -3.995     | 0.163     | 0.652 | -5.468  |
| Verrucomicrobiaceae    | 0.773 | -1.916  | -3.995     | 0.163     | 0.699 | -5.468  |
| Akkermansia            | 0.593 | -1.916  | -3.995     | 0.163     | 0.756 | -5.468  |
| <b>Fusobacteria</b>    | 0.719 | 0.624   | -1.066     | 2.313     | 0.503 | 1.423   |
| Fusobacteriia          | 0.783 | 0.624   | -1.066     | 2.313     | 0.655 | 1.423   |
| Fusobacteriales        | 0.896 | 0.624   | -1.066     | 2.313     | 0.652 | 1.423   |
| Leptotrichiaceae       | 0.997 | 0.624   | -1.066     | 2.313     | 0.699 | 1.423   |
| Streptobacillus        | 0.998 | 0.624   | -1.066     | 2.313     | 0.756 | 1.423   |
| <b>Actinobacteria</b>  | 0.836 | -0.079  | -0.632     | 0.473     | 0.629 | -0.187  |
| Actinobacteria         | 0.612 | 1.653   | -1.131     | 4.437     | 0.927 | -0.357  |
| Actinomycetales        | 0.734 | 1.653   | -1.131     | 4.437     | 0.998 | -0.357  |
| Micrococcaceae         | 0.997 | 19.577  | -7133.763  | 7172.917  | 0.998 | -18.878 |
| Nesterenkonia          | 0.998 | 19.577  | -7133.763  | 7172.917  |       |         |
| Coriobacteriia         | 0.991 | -0.100  | -0.663     | 0.462     | 0.757 | -0.183  |
| Coriobacteriales       | 0.996 | -0.100  | -0.663     | 0.462     | 0.795 | -0.183  |
| Coriobacteriaceae      | 0.997 | -0.100  | -0.663     | 0.462     | 0.873 | -0.183  |
| Adlercreutzia          | 0.998 | -0.106  | -0.677     | 0.466     | 0.957 | -0.169  |
| Nocardiaceae           | 0.997 | 19.517  | -11426.279 | 11465.313 | 0.873 | 0.841   |
| Rhodococcus            | 0.998 | 19.517  | -11426.279 | 11465.313 | 0.957 | 0.841   |
| Bifidobacteriales      |       |         |            |           |       |         |
| Bifidobacteriaceae     |       |         |            |           |       |         |
| Bifidobacterium        |       |         |            |           |       |         |
| Atopobium              |       |         |            |           |       |         |
| Arthrobacter           |       |         |            |           | 0.998 | -18.878 |
| Microbacteriaceae      |       |         |            |           |       |         |
| Microbacterium         |       |         |            |           |       |         |
| Propionibacteriaceae   |       |         |            |           |       |         |
| Propionibacterium      |       |         |            |           |       |         |
| Coriobacterium         |       |         |            |           |       |         |
| <b>Proteobacteria</b>  | 0.836 | -0.317  | -1.989     | 1.355     | 0.937 | 0.176   |
| Alphaproteobacteria    | 0.996 | 0.053   | -1.260     | 1.366     | 0.655 | -1.088  |
| Rhizobiales            | 0.996 | -0.170  | -1.667     | 1.326     | 0.576 | -1.778  |
| Rhizobiaceae           | 0.997 | -0.170  | -1.667     | 1.326     | 0.454 | -1.778  |
| Agrobacterium          | 0.998 | -0.170  | -1.667     | 1.326     | 0.472 | -1.778  |
| Comamonadaceae         | 0.997 | 19.436  | -7771.184  | 7810.056  | 0.998 | 0.154   |
| Delftia                | 0.998 | 19.201  | -7641.235  | 7679.638  | 0.998 | 19.611  |
| Betaproteobacteria     | 0.996 | 19.436  | -7771.184  | 7810.056  | 0.957 | 0.154   |
| Gammaproteobacteria    | 0.530 | -1.739  | -4.234     | 0.757     | 0.891 | 0.416   |
| Enterobacteriales      | 0.996 | -18.821 | -7714.520  | 7676.878  | 0.998 | 0.135   |
| Enterobacteriaceae     | 0.997 | -18.821 | -7714.520  | 7676.878  | 0.998 | 0.135   |

|                      |       |         |           |          |       |         |
|----------------------|-------|---------|-----------|----------|-------|---------|
| Klebsiella           | 0.998 | -18.821 | -7714.520 | 7676.878 | 0.998 | 0.135   |
| Pseudomonadales      | 0.996 | 0.055   | -1.856    | 1.967    | 0.998 | 20.243  |
| Pseudomonadaceae     | 0.997 | 0.055   | -1.856    | 1.967    |       |         |
| Pseudomonas          | 0.998 | 0.055   | -1.856    | 1.967    |       |         |
| Xanthomonadales      | 0.996 | 0.055   | -1.440    | 1.550    | 0.998 | -0.233  |
| Xanthomonadaceae     | 0.997 | 0.055   | -1.440    | 1.550    | 0.998 | -0.233  |
| Stenotrophomonas     | 0.998 | 0.055   | -1.440    | 1.550    | 0.998 | -0.233  |
| Burkholderiales      |       |         |           |          | 0.998 | 0.154   |
| Leptothrix           |       |         |           |          | 0.998 | -19.494 |
| Moraxellaceae        |       |         |           |          | 0.998 | 21.162  |
| Acinetobacter        |       |         |           |          | 0.998 | 21.162  |
| Caulobacterales      |       |         |           |          |       |         |
| Caulobacteraceae     |       |         |           |          |       |         |
| Phenylobacterium     |       |         |           |          |       |         |
| Bradyrhizobiaceae    |       |         |           |          |       |         |
| Afipia               |       |         |           |          |       |         |
| Sphingomonadales     |       |         |           |          |       |         |
| Sphingomonadaceae    |       |         |           |          |       |         |
| Sphingomonas         |       |         |           |          |       |         |
| Rhodobacterales      |       |         |           |          |       |         |
| Rhodobacteraceae     |       |         |           |          |       |         |
| Paracoccus           |       |         |           |          |       |         |
| Deltaproteobacteria  |       |         |           |          |       |         |
| Desulfovibrionales   |       |         |           |          |       |         |
| Desulfovibrionaceae  |       |         |           |          |       |         |
| Desulfovibrio        |       |         |           |          |       |         |
| <b>Chlorobi</b>      | 0.836 | -0.098  | -1.026    | 0.830    | 0.503 | -1.397  |
| BSV26                | 0.996 | -0.098  | -1.026    | 0.830    | 0.655 | -1.397  |
| BSN164               | 0.996 | -0.098  | -1.026    | 0.830    | 0.576 | -1.397  |
| <b>Cyanobacteria</b> | 0.397 | 0.831   | -0.325    | 1.987    | 0.503 | -1.729  |
| Chloroplast          | 0.530 | 0.831   | -0.325    | 1.987    | 0.655 | -1.729  |
| Streptophyta         | 0.734 | 0.831   | -0.325    | 1.987    | 0.652 | -1.729  |
| <b>Acidobacteria</b> |       |         |           |          |       |         |
| DA052                |       |         |           |          |       |         |
| Ellin6513            |       |         |           |          |       |         |

of treatment. Highlighted cells are considered statistically significant at q-values <0.1.

|                     |          | DAY 15      |          |                     |        | DAY 23      |          |  |  |
|---------------------|----------|-------------|----------|---------------------|--------|-------------|----------|--|--|
| Confidence Interval |          | Fold change |          | Confidence Interval |        | Fold change |          |  |  |
| 2.50%               | 97.50%   | q-value     | (Veh/E2) | 2.50%               | 97.50% | q-value     | (Veh/E2) |  |  |
| -0.090              | 0.188    | 0.997       | 0.001    | -0.096              | 0.099  | 0.012       | 0.132    |  |  |
| -0.528              | 0.331    | 0.129       | 0.542    | 0.022               | 1.062  | 0.026       | 0.574    |  |  |
| -0.972              | 0.426    | 0.834       | -0.175   | -0.683              | 0.334  | 0.536       | -0.237   |  |  |
| -0.936              | 0.493    | 0.976       | -0.115   | -0.692              | 0.463  | 0.997       | 0.039    |  |  |
| -0.934              | 0.496    | 0.997       | -0.107   | -0.687              | 0.472  | 0.997       | 0.033    |  |  |
| -6076.192           | 6038.956 | 0.997       | -0.401   | -2.406              | 1.604  | 0.997       | 0.174    |  |  |
| -6076.192           | 6038.956 | 0.976       | -0.401   | -2.406              | 1.604  | 0.997       | 0.174    |  |  |
| -4.010              | 0.159    | 0.675       | -0.591   | -1.859              | 0.678  | 0.187       | -1.073   |  |  |
| -4.010              | 0.159    | 0.803       | -0.591   | -1.859              | 0.678  | 0.254       | -1.073   |  |  |
| -0.506              | 0.378    | 0.185       | 0.553    | 0.017               | 1.089  | 0.031       | 0.587    |  |  |
| -1.101              | -0.140   | 0.478       | 0.638    | -0.165              | 1.440  | 0.187       | 0.602    |  |  |
| -1.101              | -0.140   | 0.532       | 0.638    | -0.165              | 1.440  | 0.254       | 0.602    |  |  |
| -0.562              | 1.155    | 0.397       | -0.420   | -0.875              | 0.036  | 0.640       | -0.259   |  |  |
| -0.017              | 1.084    | 0.728       | 0.169    | -0.262              | 0.599  | 0.316       | 0.543    |  |  |
| -0.019              | 1.083    | 0.849       | 0.169    | -0.263              | 0.600  | 0.356       | 0.554    |  |  |
| -0.074              | 1.302    | 0.997       | 0.073    | -0.535              | 0.681  | 0.997       | -0.028   |  |  |
| 0.183               | 3.059    | 0.217       | 1.951    | 0.266               | 3.636  | 0.316       | 1.034    |  |  |
| 0.183               | 3.059    | 0.357       | 1.951    | 0.266               | 3.636  | 0.356       | 1.034    |  |  |
| -0.078              | 0.182    | 0.241       | -0.084   | -0.185              | 0.017  | 0.912       | -0.029   |  |  |
| -0.078              | 0.182    | 0.345       | -0.084   | -0.185              | 0.017  | 0.996       | -0.029   |  |  |
| -0.717              | 0.413    | 0.997       | 0.048    | -0.179              | 0.276  | 0.946       | -0.075   |  |  |
| -2.273              | 0.101    | 0.997       | -0.042   | -0.743              | 0.659  | 0.316       | 0.640    |  |  |
| -2.307              | 0.157    | 0.997       | -0.101   | -0.834              | 0.632  | 0.467       | 0.688    |  |  |
| -0.803              | 0.445    | 0.675       | 0.270    | -0.278              | 0.818  | 0.997       | -0.030   |  |  |
| -0.442              | 0.630    | 0.997       | 0.017    | -0.506              | 0.541  | 0.997       | -0.015   |  |  |
| -6055.877           | 6017.923 | 0.894       | -4.778   | -18.216             | 8.660  | 0.997       | -18.923  |  |  |
| -0.139              | 0.247    | 0.714       | -0.062   | -0.208              | 0.085  | 0.997       | -0.010   |  |  |
| -4.762              | 0.173    | 0.997       | 0.307    | -1.508              | 2.121  | 0.997       | 0.042    |  |  |
| -1.848              | 1.308    | 0.668       | 0.997    | -0.538              | 2.531  | 0.798       | 1.700    |  |  |
| -0.309              | 0.653    | 0.532       | 0.359    | -0.116              | 0.834  | 0.488       | 0.329    |  |  |
| -0.833              | 0.412    | 0.803       | 0.246    | -0.288              | 0.779  | 0.997       | -0.043   |  |  |
| -0.463              | 0.178    | 0.532       | 0.234    | -0.062              | 0.530  | 0.379       | -0.232   |  |  |
| -0.411              | 0.762    | 0.532       | 0.592    | -0.087              | 1.272  | 0.356       | 0.544    |  |  |
| -1.168              | 1.532    | 0.532       | 3.175    | -0.845              | 7.195  | 0.826       | -1.072   |  |  |
| -0.387              | 0.560    | 0.532       | 0.452    | -0.114              | 1.019  | 0.997       | -0.100   |  |  |



|            |           |       |         |           |          |       |        |
|------------|-----------|-------|---------|-----------|----------|-------|--------|
| -1.317     | 0.765     | 0.997 | -0.084  | -0.912    | 0.743    | 0.826 | -0.505 |
| -3.510     | 0.410     | 0.997 | -20.043 | -9914.922 | 9874.837 | 0.997 | 0.183  |
| -0.756     | 0.972     | 0.997 | -0.104  | -1.710    | 1.502    | 0.798 | 0.547  |
| -0.692     | 1.101     | 0.570 | 0.518   | -0.281    | 1.317    | 0.369 | 0.554  |
| -0.102     | 0.251     | 0.406 | -0.131  | -0.282    | 0.019    | 0.471 | -0.073 |
| -0.154     | 0.365     | 0.035 | -0.384  | -0.608    | -0.161   | 0.997 | -0.052 |
| -0.172     | 1.866     | 0.849 | -0.312  | -1.058    | 0.433    | 0.997 | 0.113  |
| -0.111     | 0.288     | 0.803 | 0.078   | -0.082    | 0.237    | 0.997 | 0.046  |
| -0.161     | 1.186     | 0.262 | 0.243   | -0.103    | 0.589    | 0.004 | 0.565  |
| -0.161     | 1.186     | 0.421 | 0.243   | -0.103    | 0.589    | 0.005 | 0.565  |
| -0.161     | 1.186     | 0.524 | 0.243   | -0.103    | 0.589    | 0.007 | 0.565  |
| -3.020     | 1.094     | 0.997 | 19.182  | -9289.834 | 9328.199 | 0.254 | 2.487  |
| -0.213     | 1.078     | 0.803 | 0.194   | -0.177    | 0.565    | 0.356 | 0.296  |
| -1.543     | 0.125     | 0.997 | 22.127  | -7527.969 | 7572.223 | 0.997 | 20.695 |
| -0.070     | 2.524     | 0.408 | 0.944   | 0.064     | 1.824    | 0.997 | 0.514  |
| -1.543     | 0.125     | 0.997 | 22.127  | -7527.969 | 7572.223 | 0.997 | 20.695 |
| -1.543     | 0.125     | 0.997 | 22.127  | -7527.969 | 7572.223 | 0.997 | 20.695 |
| -0.397     | 0.292     | 0.670 | -0.192  | -0.545    | 0.161    | 0.337 | -0.205 |
| -0.397     | 0.292     | 0.803 | -0.192  | -0.545    | 0.161    | 0.405 | -0.205 |
| -2.107     | 3.013     |       |         |           |          |       |        |
|            |           | 0.997 | 19.311  | -7453.486 | 7492.108 | 0.997 | 19.792 |
|            |           | 0.997 | -19.491 | -8329.763 | 8290.780 | 0.997 | 18.642 |
| -0.962     | 0.085     | 0.103 | -0.402  | -0.775    | -0.030   | 0.007 | -0.635 |
| -0.962     | 0.085     | 0.129 | -0.402  | -0.775    | -0.030   | 0.008 | -0.635 |
| -0.962     | 0.085     | 0.185 | -0.402  | -0.775    | -0.030   | 0.010 | -0.635 |
| -0.962     | 0.085     | 0.239 | -0.402  | -0.775    | -0.030   | 0.015 | -0.635 |
| -1.453     | 1.765     |       |         |           |          | 0.997 | 19.670 |
| -1.453     | 1.765     |       |         |           |          | 0.997 | 19.670 |
| -1.453     | 1.765     |       |         |           |          | 0.997 | 19.670 |
| -1.453     | 1.765     |       |         |           |          | 0.997 | 19.670 |
| -0.791     | 0.748     | 0.058 | 1.274   | 0.271     | 2.278    | 0.256 | -0.674 |
| -0.791     | 0.748     | 0.089 | 1.274   | 0.271     | 2.278    | 0.359 | -0.674 |
| -13323.065 | 13284.447 |       |         |           |          |       |        |
| -13323.065 | 13284.447 |       |         |           |          |       |        |
| -13323.065 | 13284.447 |       |         |           |          |       |        |
| -0.434     | 1.554     | 0.490 | 2.279   | -1.564    | 6.121    |       |        |
| -0.434     | 1.554     | 0.624 | 2.279   | -1.564    | 6.121    |       |        |
| -0.434     | 1.554     | 0.752 | 2.279   | -1.564    | 6.121    |       |        |
| -1.094     | 0.618     | 0.132 | 1.272   | 0.266     | 2.277    | 0.436 | -0.674 |
| -1.107     | 0.604     | 0.189 | 1.249   | 0.258     | 2.241    | 0.337 | -0.677 |
| -0.902     | 0.088     | 0.453 | -0.326  | -0.650    | -0.001   | 0.182 | -0.506 |

|           |          |       |         |           |          |       |         |
|-----------|----------|-------|---------|-----------|----------|-------|---------|
| -15.375   | 4.440    | 0.276 | -0.800  | -1.898    | 0.298    | 0.933 | 0.102   |
| -15.375   | 4.440    | 0.262 | -0.800  | -1.898    | 0.298    | 0.997 | 0.102   |
| -15.375   | 4.440    | 0.421 | -0.800  | -1.898    | 0.298    | 0.997 | 0.102   |
| -15.375   | 4.440    | 0.524 | -0.800  | -1.898    | 0.298    | 0.997 | 0.102   |
| -15.375   | 4.440    | 0.543 | -0.800  | -1.898    | 0.298    | 0.997 | 0.102   |
| -1.043    | 3.890    | 0.540 | 1.303   | -1.487    | 4.093    | 0.997 | 20.189  |
| -1.043    | 3.890    | 0.458 | 1.303   | -1.487    | 4.093    | 0.997 | 20.189  |
| -1.043    | 3.890    | 0.655 | 1.303   | -1.487    | 4.093    | 0.997 | 20.189  |
| -1.043    | 3.890    | 0.675 | 1.303   | -1.487    | 4.093    | 0.997 | 20.189  |
| -1.043    | 3.890    | 0.803 | 1.303   | -1.487    | 4.093    | 0.997 | 20.189  |
| -0.669    | 0.295    | 0.000 | 1.440   | 0.778     | 2.101    | 0.000 | 1.275   |
| -2.480    | 1.766    | 0.798 | 0.248   | -0.944    | 1.439    | 0.912 | 0.468   |
| -2.480    | 1.766    | 0.997 | -0.163  | -1.454    | 1.127    | 0.996 | 0.468   |
| -7695.698 | 7657.942 | 0.867 | -0.444  | -1.926    | 1.039    | 0.978 | -0.503  |
|           |          | 0.849 | -1.032  | -3.648    | 1.584    |       |         |
| -0.661    | 0.296    | 0.000 | 1.444   | 0.780     | 2.108    | 0.000 | 1.277   |
| -0.661    | 0.296    | 0.000 | 1.444   | 0.780     | 2.108    | 0.000 | 1.277   |
| -0.661    | 0.296    | 0.001 | 1.444   | 0.780     | 2.108    | 0.000 | 1.277   |
| -0.667    | 0.330    | 0.338 | 0.541   | 0.106     | 0.976    | 0.254 | 0.559   |
| -2.152    | 3.834    |       |         |           |          | 0.997 | 19.657  |
| -2.152    | 3.834    |       |         |           |          | 0.997 | 19.657  |
|           |          | 0.997 | 20.472  | -7326.518 | 7367.462 |       |         |
|           |          | 0.997 | 20.472  | -7326.518 | 7367.462 |       |         |
|           |          | 0.997 | 20.472  | -7326.518 | 7367.462 |       |         |
|           |          | 0.532 | 1.477   | -0.470    | 3.423    | 0.356 | 0.883   |
| -7695.698 | 7657.942 | 0.997 | 0.067   | -2.206    | 2.341    | 0.997 | -20.059 |
|           |          |       |         |           |          | 0.254 | 1.981   |
| -1.460    | 1.812    | 0.734 | -0.420  | -1.874    | 1.033    | 0.423 | -0.843  |
| -3.172    | 0.995    | 0.262 | 1.144   | -0.477    | 2.765    | 0.997 | -0.293  |
| -4.099    | 0.544    | 0.997 | 18.883  | -5515.701 | 5553.467 | 0.997 | -0.381  |
| -4.099    | 0.544    | 0.997 | 18.883  | -5515.701 | 5553.467 | 0.997 | -0.381  |
| -4.099    | 0.544    | 0.997 | 18.883  | -5515.701 | 5553.467 | 0.997 | -0.381  |
| -2.671    | 2.979    | 0.997 | 20.821  | -9561.355 | 9602.996 | 0.997 | 0.169   |
| -8535.288 | 8574.510 | 0.997 | 19.607  | -6748.532 | 6787.746 |       |         |
| -2.671    | 2.979    | 0.997 | 20.821  | -9561.355 | 9602.996 | 0.997 | 0.169   |
| -1.391    | 2.223    | 0.280 | -1.800  | -4.553    | 0.954    | 0.641 | -1.329  |
| -1.789    | 2.059    | 0.997 | -18.964 | -7645.230 | 7607.303 | 0.536 | -2.427  |
| -1.789    | 2.059    | 0.997 | -18.964 | -7645.230 | 7607.303 | 0.471 | -2.427  |

|            |           |       |         |            |           |       |        |
|------------|-----------|-------|---------|------------|-----------|-------|--------|
| -1.789     | 2.059     | 0.997 | -18.964 | -7645.230  | 7607.303  | 0.577 | -2.427 |
| -8057.879  | 8098.366  | 0.456 | 1.189   | -0.650     | 3.028     | 0.997 | 20.530 |
|            |           | 0.997 | 20.380  | -11082.623 | 11123.382 | 0.997 | 19.657 |
|            |           | 0.997 | 20.380  | -11082.623 | 11123.382 | 0.997 | 19.657 |
| -1.949     | 1.483     |       |         |            |           |       |        |
| -1.949     | 1.483     |       |         |            |           |       |        |
| -1.949     | 1.483     |       |         |            |           |       |        |
| -2.671     | 2.979     | 0.997 | 20.821  | -9561.355  | 9602.996  | 0.997 | 0.169  |
| -11990.017 | 11951.029 |       |         |            |           |       |        |
| -11990.404 | 12032.727 |       |         |            |           |       |        |
| -11990.404 | 12032.727 |       |         |            |           |       |        |
|            |           | 0.997 | 0.045   | -2.327     | 2.416     |       |        |
|            |           | 0.997 | 0.045   | -2.327     | 2.416     |       |        |
|            |           | 0.997 | 0.045   | -2.327     | 2.416     |       |        |
| -3.239     | 0.445     | 0.104 | -1.338  | -2.653     | -0.023    | 0.430 | -0.739 |
| -3.239     | 0.445     | 0.129 | -1.338  | -2.653     | -0.023    | 0.646 | -0.739 |
| -3.239     | 0.445     | 0.185 | -1.338  | -2.653     | -0.023    | 0.686 | -0.739 |
| -4.834     | 1.376     |       |         |            |           |       |        |
| -4.834     | 1.376     |       |         |            |           |       |        |
| -4.834     | 1.376     |       |         |            |           |       |        |
|            |           | 0.997 | -19.520 | -10683.960 | 10644.920 |       |        |
|            |           | 0.997 | -19.520 | -10683.960 | 10644.920 |       |        |
|            |           | 0.997 | -19.520 | -10683.960 | 10644.920 |       |        |

---

|                     |          | DAY 31              |                      |           |          | DAY 35              |                      |           |          |         |                      |
|---------------------|----------|---------------------|----------------------|-----------|----------|---------------------|----------------------|-----------|----------|---------|----------------------|
| Confidence Interval |          | Confidence Interval |                      |           |          | Confidence Interval |                      |           |          |         |                      |
| 2.50%               | 97.50%   | q-value             | Fold change (Veh/E2) | 2.50%     | 97.50%   | q value             | Fold change (Veh/E2) | 2.50%     | 97.50%   | q value | Fold change (Veh/E2) |
| 0.041               | 0.223    | 0.060               | 0.215                | 0.057     | 0.372    | 0.042               | 0.183                | 0.057     | 0.372    | 0.042   | 0.183                |
| 0.154               | 0.994    | 0.005               | 0.987                | 0.415     | 1.559    | 0.029               | 0.761                | 0.415     | 1.559    | 0.029   | 0.761                |
| -0.616              | 0.142    | 0.005               | 0.626                | 0.260     | 0.992    | 0.915               | -0.287               | 0.260     | 0.992    | 0.915   | -0.287               |
| -0.474              | 0.552    | 0.066               | 0.502                | 0.126     | 0.878    | 0.998               | -0.039               | 0.126     | 0.878    | 0.998   | -0.039               |
| -0.476              | 0.542    | 0.126               | 0.502                | 0.126     | 0.878    | 0.998               | -0.044               | 0.126     | 0.878    | 0.998   | -0.044               |
| -1.741              | 2.089    | 0.997               | -0.091               | -1.488    | 1.306    | 0.998               | -0.173               | -1.488    | 1.306    | 0.998   | -0.173               |
| -1.741              | 2.089    | 0.997               | -0.091               | -1.488    | 1.306    | 0.998               | -0.173               | -1.488    | 1.306    | 0.998   | -0.173               |
| -2.033              | -0.114   | 0.243               | 1.267                | -0.194    | 2.727    | 0.152               | -1.596               | -0.194    | 2.727    | 0.152   | -1.596               |
| -2.033              | -0.114   | 0.389               | 1.267                | -0.194    | 2.727    | 0.300               | -1.596               | -0.194    | 2.727    | 0.300   | -1.596               |
| 0.158               | 1.016    | 0.005               | 0.993                | 0.410     | 1.576    | 0.038               | 0.780                | 0.410     | 1.576    | 0.038   | 0.780                |
| 0.044               | 1.161    | 0.021               | 1.392                | 0.507     | 2.278    | 0.038               | 1.069                | 0.507     | 2.278    | 0.038   | 1.069                |
| 0.044               | 1.161    | 0.050               | 1.392                | 0.507     | 2.278    | 0.173               | 1.069                | 0.507     | 2.278    | 0.173   | 1.069                |
| -0.784              | 0.265    | 0.997               | -0.107               | -0.540    | 0.326    | 0.722               | -0.254               | -0.540    | 0.326    | 0.722   | -0.254               |
| -0.051              | 1.138    | 0.982               | 0.161                | -0.302    | 0.624    | 0.995               | 0.117                | -0.302    | 0.624    | 0.995   | 0.117                |
| -0.050              | 1.158    | 0.961               | 0.164                | -0.303    | 0.630    | 0.998               | 0.121                | -0.303    | 0.630    | 0.998   | 0.121                |
| -0.492              | 0.437    | 0.997               | -0.054               | -0.482    | 0.375    | 0.998               | -0.131               | -0.482    | 0.375    | 0.998   | -0.131               |
| -0.153              | 2.221    | 0.368               | 0.911                | -0.321    | 2.143    | 0.998               | -0.084               | -0.321    | 2.143    | 0.998   | -0.084               |
| -0.153              | 2.221    | 0.551               | 0.911                | -0.321    | 2.143    | 0.998               | -0.084               | -0.321    | 2.143    | 0.998   | -0.084               |
| -0.133              | 0.075    | 0.938               | -0.005               | -0.140    | 0.129    | 0.791               | -0.042               | -0.140    | 0.129    | 0.791   | -0.042               |
| -0.133              | 0.075    | 0.997               | -0.005               | -0.140    | 0.129    | 0.915               | -0.042               | -0.140    | 0.129    | 0.915   | -0.042               |
| -0.269              | 0.120    | 0.389               | 0.196                | -0.024    | 0.416    | 0.629               | 0.170                | -0.024    | 0.416    | 0.629   | 0.170                |
| -0.109              | 1.389    | 0.982               | 0.314                | -0.651    | 1.278    | 0.998               | 0.229                | -0.651    | 1.278    | 0.998   | 0.229                |
| -0.246              | 1.621    | 0.994               | 0.296                | -0.860    | 1.452    | 0.998               | 0.178                | -0.860    | 1.452    | 0.998   | 0.178                |
| -1.078              | 1.017    | 0.080               | 1.078                | 0.201     | 1.955    | 0.081               | 1.085                | 0.201     | 1.955    | 0.081   | 1.085                |
| -0.492              | 0.463    | 0.826               | -0.303               | -0.887    | 0.281    | 0.537               | -0.356               | -0.887    | 0.281    | 0.537   | -0.356               |
| -6494.104           | 6456.259 | 0.997               | -18.353              | -5614.412 | 5577.706 | 0.998               | -4.213               | -5614.412 | 5577.706 | 0.998   | -4.213               |
| -0.171              | 0.151    | 0.997               | 0.047                | -0.150    | 0.243    | 0.998               | -0.032               | -0.150    | 0.243    | 0.998   | -0.032               |
| -1.377              | 1.462    | 0.994               | -0.736               | -3.106    | 1.635    | 0.998               | 0.067                | -3.106    | 1.635    | 0.998   | 0.067                |
| -1.573              | 4.974    | 0.997               | 0.239                | -1.273    | 1.750    | 0.537               | 1.135                | -1.273    | 1.750    | 0.537   | 1.135                |
| -0.137              | 0.794    | 0.126               | 0.468                | 0.098     | 0.838    | 0.998               | 0.229                | 0.098     | 0.838    | 0.998   | 0.229                |
| -1.102              | 1.016    | 0.131               | 1.075                | 0.197     | 1.953    | 0.173               | 1.085                | 0.197     | 1.953    | 0.173   | 1.085                |
| -0.512              | 0.047    | 0.961               | 0.132                | -0.223    | 0.487    | 0.998               | -0.006               | -0.223    | 0.487    | 0.998   | -0.006               |
| -0.083              | 1.172    | 0.997               | 0.022                | -0.857    | 0.901    | 0.998               | 0.312                | -0.857    | 0.901    | 0.998   | 0.312                |
| -3.380              | 1.236    | 0.796               | 0.928                | -0.705    | 2.560    | 0.998               | -0.383               | -0.705    | 2.560    | 0.998   | -0.383               |
| -0.675              | 0.475    | 0.994               | 0.168                | -0.437    | 0.772    | 0.335               | 0.539                | -0.437    | 0.772    | 0.335   | 0.539                |

|           |          |       |         |           |          |       |        |
|-----------|----------|-------|---------|-----------|----------|-------|--------|
| -1.621    | 0.611    | 0.961 | -0.387  | -1.331    | 0.558    | 0.537 | -2.365 |
| -1.666    | 2.031    | 0.997 | -18.973 | -7057.403 | 7019.458 | 0.998 | -0.883 |
| -0.546    | 1.641    | 0.997 | 0.096   | -0.810    | 1.002    | 0.998 | -0.232 |
| -0.201    | 1.309    | 0.000 | 1.103   | 0.643     | 1.563    | 0.152 | 0.866  |
| -0.190    | 0.045    | 0.080 | -0.204  | -0.367    | -0.041   | 0.031 | -0.208 |
| -0.301    | 0.196    | 0.551 | -0.186  | -0.448    | 0.077    | 0.537 | -0.229 |
| -0.766    | 0.992    | 0.961 | -0.196  | -0.767    | 0.375    | 0.998 | -0.122 |
| -0.116    | 0.208    | 0.994 | -0.052  | -0.229    | 0.124    | 0.998 | -0.048 |
| 0.245     | 0.885    | 0.004 | 0.721   | 0.332     | 1.110    | 0.022 | 0.762  |
| 0.245     | 0.885    | 0.005 | 0.721   | 0.332     | 1.110    | 0.029 | 0.762  |
| 0.245     | 0.885    | 0.004 | 0.721   | 0.332     | 1.110    | 0.031 | 0.762  |
| 0.237     | 4.737    | 0.015 | 1.886   | 0.863     | 2.909    | 0.173 | 1.426  |
| -0.028    | 0.620    | 0.126 | 0.463   | 0.107     | 0.819    | 0.173 | 0.522  |
| -6610.962 | 6652.352 | 0.997 | 20.237  | -7582.521 | 7622.995 | 0.998 | 19.121 |
| -1.012    | 2.041    | 0.551 | -0.527  | -1.283    | 0.229    | 0.998 | 0.381  |
| -6610.962 | 6652.352 | 0.997 | 20.237  | -7582.521 | 7622.995 | 0.998 | 19.121 |
| -6610.962 | 6652.352 | 0.997 | 20.237  | -7582.521 | 7622.995 | 0.997 | 19.121 |
| -0.463    | 0.053    | 0.982 | -0.110  | -0.426    | 0.206    | 0.998 | -0.101 |
| -0.463    | 0.053    | 0.961 | -0.110  | -0.426    | 0.206    | 0.998 | -0.101 |
| -8767.607 | 8807.191 | 0.389 | 1.580   | -0.176    | 3.336    | 0.998 | 19.910 |
| -6678.268 | 6715.552 |       |         |           |          | 0.998 | 19.666 |
| -1.032    | -0.239   | 0.089 | -0.299  | -0.619    | 0.021    | 0.664 | -0.244 |
| -1.032    | -0.239   | 0.125 | -0.299  | -0.619    | 0.021    | 0.791 | -0.244 |
| -1.032    | -0.239   | 0.143 | -0.299  | -0.619    | 0.021    | 0.915 | -0.244 |
| -1.032    | -0.239   | 0.210 | -0.299  | -0.619    | 0.021    | 0.767 | -0.244 |
| -9463.821 | 9503.160 |       |         |           |          |       |        |
| -9463.821 | 9503.160 |       |         |           |          |       |        |
| -9463.821 | 9503.160 |       |         |           |          |       |        |
| -9463.821 | 9503.160 |       |         |           |          |       |        |
| -1.543    | 0.194    | 0.089 | 0.868   | -0.054    | 1.789    | 0.664 | 0.520  |
| -1.543    | 0.194    | 0.125 | 0.868   | -0.054    | 1.789    | 0.791 | 0.520  |
| -1.543    | 0.194    | 0.143 | 0.868   | -0.054    | 1.789    | 0.915 | 0.520  |
| -1.541    | 0.188    | 0.210 | 0.838   | -0.068    | 1.744    | 0.808 | 0.516  |
| -0.852    | -0.160   | 0.551 | -0.186  | -0.447    | 0.074    | 0.998 | -0.145 |

|            |           |       |         |            |           |       |         |
|------------|-----------|-------|---------|------------|-----------|-------|---------|
| -0.762     | 0.966     | 0.406 | -0.412  | -1.287     | 0.462     | 0.664 | -0.391  |
| -0.762     | 0.966     | 0.513 | -0.412  | -1.287     | 0.462     | 0.791 | -0.391  |
| -0.762     | 0.966     | 0.604 | -0.412  | -1.287     | 0.462     | 0.915 | -0.391  |
| -0.762     | 0.966     | 0.820 | -0.412  | -1.287     | 0.462     | 0.995 | -0.391  |
| -0.762     | 0.966     | 0.853 | -0.412  | -1.287     | 0.462     | 0.998 | -0.391  |
| -10543.363 | 10583.741 | 0.722 | -0.475  | -3.089     | 2.139     | 0.997 | 20.406  |
| -10543.363 | 10583.741 | 0.848 | -0.475  | -3.089     | 2.139     | 0.997 | 20.406  |
| -10543.363 | 10583.741 | 0.997 | -0.475  | -3.089     | 2.139     | 0.997 | 20.406  |
| -10543.363 | 10583.741 | 0.997 | -0.475  | -3.089     | 2.139     | 0.998 | 20.406  |
| -10543.363 | 10583.741 | 0.997 | -0.475  | -3.089     | 2.139     | 0.998 | 20.406  |
| 0.777      | 1.773     | 0.089 | 0.518   | -0.001     | 1.038     | 0.032 | 0.802   |
| -1.186     | 2.123     | 0.362 | -1.482  | -3.864     | 0.899     | 0.791 | -1.630  |
| -1.186     | 2.123     | 0.420 | -1.482  | -3.864     | 0.899     | 0.915 | -1.630  |
| -2.126     | 1.119     | 0.997 | -18.740 | -5415.071  | 5377.592  | 0.767 | 1.317   |
|            |           |       |         |            |           | 0.998 | 0.293   |
| 0.776      | 1.777     | 0.125 | 0.525   | 0.002      | 1.048     | 0.022 | 0.851   |
| 0.776      | 1.777     | 0.143 | 0.525   | 0.002      | 1.048     | 0.029 | 0.851   |
| 0.776      | 1.777     | 0.192 | 0.525   | 0.002      | 1.048     | 0.031 | 0.851   |
| 0.098      | 1.021     | 0.796 | 0.219   | -0.180     | 0.619     | 0.537 | 0.468   |
| -8194.362  | 8233.675  | 0.997 | 19.449  | -11011.398 | 11050.296 |       |         |
| -8194.362  | 8233.675  | 0.997 | 19.449  | -11011.398 | 11050.296 |       |         |
|            |           |       |         |            |           |       |         |
|            |           |       |         |            |           |       |         |
| -0.126     | 1.892     | 0.994 | 0.358   | -1.062     | 1.777     | 0.998 | 0.146   |
| -8744.604  | 8704.486  | 0.997 | -18.740 | -5415.071  | 5377.592  | 0.173 | 1.827   |
|            |           | 0.997 | -19.936 | -11921.968 | 11882.097 |       |         |
|            |           | 0.997 | -19.936 | -11921.968 | 11882.097 |       |         |
|            |           | 0.997 | -19.167 | -8120.994  | 8082.661  | 0.998 | -19.335 |
|            |           | 0.997 | -19.167 | -8120.994  | 8082.661  | 0.998 | -19.335 |
| 0.208      | 3.755     | 0.389 | 0.917   | -0.117     | 1.952     | 0.537 | 1.245   |
| -2.324     | 0.638     | 0.089 | -1.425  | -2.713     | -0.138    | 0.771 | -0.306  |
| -2.119     | 1.532     | 0.125 | -1.510  | -3.114     | 0.094     | 0.888 | -0.275  |
| -2.561     | 1.798     | 0.997 | -0.353  | -2.039     | 1.333     | 0.997 | 0.244   |
| -2.561     | 1.798     | 0.997 | 0.044   | -1.847     | 1.935     | 0.722 | 1.235   |
| -2.561     | 1.798     | 0.997 | 0.044   | -1.847     | 1.935     | 0.664 | 1.235   |
| -1.849     | 2.186     | 0.997 | -0.257  | -2.079     | 1.565     | 0.998 | -0.143  |
|            |           | 0.853 | 1.364   | -1.494     | 4.221     | 0.998 | 0.441   |
| -1.849     | 2.186     | 0.848 | -0.257  | -2.079     | 1.565     | 0.997 | -0.143  |
| -3.715     | 1.057     | 0.637 | -0.854  | -3.279     | 1.571     | 0.888 | -0.455  |
| -6.221     | 1.367     | 0.997 | -19.702 | -9799.957  | 9760.553  | 0.997 | -0.496  |
| -6.221     | 1.367     | 0.997 | -19.702 | -9799.957  | 9760.553  | 0.998 | -0.496  |

|           |          |       |         |            |          |       |         |
|-----------|----------|-------|---------|------------|----------|-------|---------|
| -6.221    | 1.367    | 0.997 | -19.702 | -9799.957  | 9760.553 | 0.998 | -0.496  |
| -9122.354 | 9163.414 | 0.997 | 18.954  | -6406.095  | 6444.003 |       |         |
| -8194.362 | 8233.675 | 0.997 | 18.954  | -6406.095  | 6444.003 |       |         |
| -8194.362 | 8233.675 | 0.997 | 18.954  | -6406.095  | 6444.003 |       |         |
|           |          |       |         |            |          | 0.997 | 0.441   |
|           |          |       |         |            |          | 0.998 | 0.441   |
|           |          |       |         |            |          | 0.998 | 0.441   |
| -1.849    | 2.186    | 0.997 | -0.257  | -2.079     | 1.565    | 0.997 | -0.143  |
|           |          | 0.997 | -19.295 | -10015.386 | 9976.796 | 0.998 | -0.260  |
|           |          |       |         |            |          |       |         |
|           |          | 0.997 | -19.481 | -9593.444  | 9554.482 | 0.998 | -18.928 |
|           |          | 0.997 | -19.481 | -9593.444  | 9554.482 | 0.998 | -18.928 |
|           |          | 0.143 | -2.395  | -4.802     | 0.012    |       |         |
|           |          | 0.192 | -2.395  | -4.802     | 0.012    |       |         |
|           |          | 0.997 | 18.954  | -6406.095  | 6444.003 |       |         |
|           |          |       |         |            |          | 0.997 | -19.420 |
|           |          |       |         |            |          | 0.998 | -19.420 |
|           |          |       |         |            |          | 0.998 | -19.420 |
|           |          |       |         |            |          | 0.997 | 19.486  |
|           |          |       |         |            |          | 0.997 | 19.486  |
|           |          |       |         |            |          | 0.998 | 19.486  |
|           |          |       |         |            |          | 0.998 | 19.486  |
| -2.203    | 0.726    | 0.089 | -1.410  | -2.876     | 0.055    | 0.664 | -0.529  |
| -2.203    | 0.726    | 0.125 | -1.410  | -2.876     | 0.055    | 0.791 | -0.529  |
| -2.203    | 0.726    | 0.143 | -1.410  | -2.876     | 0.055    | 0.915 | -0.529  |

## Confidence Interval

| <b>2.50%</b> | <b>97.50%</b> |
|--------------|---------------|
| 0.043        | 0.324         |
| 0.217        | 1.306         |
| -0.830       | 0.256         |
| -0.635       | 0.557         |
| -0.641       | 0.553         |
| -2.959       | 2.613         |
| -2.959       | 2.613         |
| -3.094       | -0.099        |
| -3.094       | -0.099        |
| 0.219        | 1.340         |
| 0.319        | 1.818         |
| 0.319        | 1.818         |
| -0.664       | 0.156         |
| -0.208       | 0.443         |
| -0.208       | 0.450         |
| -0.624       | 0.362         |
| -1.817       | 1.649         |
| -1.817       | 1.649         |
| -0.165       | 0.082         |
| -0.165       | 0.082         |
| -0.078       | 0.419         |
| -1.018       | 1.477         |
| -1.281       | 1.637         |
| 0.220        | 1.950         |
| -0.832       | 0.120         |
| -13.077      | 4.651         |
| -0.219       | 0.154         |
| -2.083       | 2.217         |
| -0.318       | 2.588         |
| -0.247       | 0.705         |
| 0.220        | 1.950         |
| -0.290       | 0.278         |
| -0.518       | 1.141         |
| -2.200       | 1.434         |
| 0.005        | 1.074         |



|            |           |
|------------|-----------|
| -5.322     | 0.592     |
| -3.708     | 1.942     |
| -1.167     | 0.703     |
| 0.058      | 1.674     |
| -0.343     | -0.072    |
| -0.533     | 0.075     |
| -0.989     | 0.745     |
| -0.161     | 0.065     |
| 0.273      | 1.250     |
| 0.273      | 1.250     |
| 0.273      | 1.250     |
| 0.373      | 2.479     |
| 0.093      | 0.950     |
| -6308.088  | 6346.330  |
| -0.453     | 1.216     |
| -6308.088  | 6346.330  |
| -6308.088  | 6346.330  |
| -0.406     | 0.205     |
| -0.406     | 0.205     |
| -8583.759  | 8623.578  |
| -10430.797 | 10470.129 |
| -0.697     | 0.209     |
| -0.697     | 0.209     |
| -0.697     | 0.209     |
| -0.697     | 0.209     |
| -0.532     | 1.572     |
| -0.532     | 1.572     |
| -0.532     | 1.572     |
| -0.531     | 1.563     |
| -0.520     | 0.230     |

|            |           |
|------------|-----------|
| -1.435     | 0.654     |
| -1.435     | 0.654     |
| -1.435     | 0.654     |
| -1.435     | 0.654     |
| -1.435     | 0.654     |
| -11351.938 | 11392.750 |
| -11351.938 | 11392.750 |
| -11351.938 | 11392.750 |
| -11351.938 | 11392.750 |
| -11351.938 | 11392.750 |
| 0.255      | 1.349     |
| -5.155     | 1.896     |
| -5.155     | 1.896     |
| -1.062     | 3.697     |
| -2.908     | 3.494     |
| 0.286      | 1.417     |
| 0.286      | 1.417     |
| 0.286      | 1.417     |
| -0.131     | 1.067     |
| -1.842     | 2.134     |
| 0.318      | 3.336     |
| -13994.878 | 13956.208 |
| -13994.878 | 13956.208 |
| -0.327     | 2.816     |
| -1.737     | 1.125     |
| -1.664     | 1.113     |
| -1.438     | 1.926     |
| -0.667     | 3.138     |
| -0.667     | 3.138     |
| -1.713     | 1.427     |
| -1.258     | 2.140     |
| -1.713     | 1.427     |
| -2.637     | 1.726     |
| -2.797     | 1.804     |
| -2.797     | 1.804     |

-2.797 1.804

-1.664 2.546

-1.664 2.546

-1.664 2.546

-1.713 1.427

-1.782 1.263

-8370.841 8332.985

-8370.841 8332.985

-11357.471 11318.632

-11357.471 11318.632

-11357.471 11318.632

-9410.643 9449.615

-9410.643 9449.615

-9410.643 9449.615

-9410.643 9449.615

-2.057 1.000

-2.057 1.000

-2.057 1.000

**Supplemental Table 2:** Changes in taxa relative abundances across days as an effect of genotype.

|                     | DAY 4        |                                    |                     |           | DAY 7        |                                    |
|---------------------|--------------|------------------------------------|---------------------|-----------|--------------|------------------------------------|
|                     | q-value      | Fold change<br>( <i>obob</i> /Het) | Confidence Interval |           | q-value      | Fold change<br>( <i>obob</i> /Het) |
|                     |              |                                    | 2.5%                | 97.5%     |              |                                    |
| <b>Firmicutes</b>   | 0.239        | 0.089                              | -0.015              | 0.192     | 0.412        | 0.065                              |
| Bacilli             | <b>0.001</b> | -1.637                             | -2.412              | -0.862    | <b>0.041</b> | -0.659                             |
| Bacillales          | <b>0.082</b> | -0.629                             | -1.172              | -0.085    | 0.831        | 0.279                              |
| Bacillaceae         | 0.137        | -0.529                             | -1.034              | -0.024    | 0.861        | 0.291                              |
| Bacillus            | 0.134        | -0.529                             | -1.034              | -0.024    | 0.829        | 0.289                              |
| Lysinibacillus      | 0.876        | 0.699                              | -2.733              | 4.132     | 0.998        | -0.165                             |
| Planococcaceae      | 0.893        | 0.699                              | -2.733              | 4.132     | 0.998        | -0.165                             |
| Staphylococcaceae   | 0.581        | -1.236                             | -3.760              | 1.288     | 0.998        | -0.169                             |
| Staphylococcus      | 0.610        | -1.236                             | -3.760              | 1.288     | 0.998        | -0.169                             |
| Lactobacillales     | <b>0.012</b> | -1.639                             | -2.574              | -0.704    | <b>0.099</b> | -0.594                             |
| Lactobacillaceae    | <b>0.008</b> | -1.797                             | -2.765              | -0.829    | <b>0.000</b> | -2.599                             |
| Lactobacillus       | <b>0.013</b> | -1.797                             | -2.765              | -0.829    | <b>0.000</b> | -2.599                             |
| Mogibacteriaceae    | 0.871        | 0.245                              | -0.583              | 1.074     | 0.936        | 0.199                              |
| Streptococcaceae    | 0.997        | -0.011                             | -0.914              | 0.892     | <b>0.017</b> | 1.032                              |
| Lactococcus         | 0.427        | 1.224                              | -0.674              | 3.122     | <b>0.014</b> | 1.038                              |
| Streptococcus       | 0.998        | -0.072                             | -1.022              | 0.877     | 0.441        | 0.506                              |
| Enterococcaceae     | 0.603        | 0.850                              | -1.006              | 2.706     | 0.162        | 1.884                              |
| Enterococcus        | 0.643        | 0.850                              | -1.006              | 2.706     | 0.158        | 1.884                              |
| Clostridia          | <b>0.017</b> | 0.145                              | 0.045               | 0.245     | 0.329        | 0.100                              |
| Clostridiales       | <b>0.019</b> | 0.145                              | 0.045               | 0.245     | 0.472        | 0.100                              |
| Epulopiscium        | <b>0.017</b> | 1.639                              | 0.648               | 2.630     | <b>0.014</b> | 1.137                              |
| Christensenellaceae | 0.893        | -0.182                             | -0.960              | 0.595     | 0.936        | -0.227                             |
| Christensenella     | 0.876        | -0.171                             | -0.965              | 0.623     | 0.998        | -0.220                             |
| Clostridiaceae      | <b>0.070</b> | -1.089                             | -1.974              | -0.205    | <b>0.009</b> | -1.223                             |
| Anaerotruncus       | <b>0.017</b> | 1.071                              | 0.412               | 1.730     | <b>0.014</b> | 1.038                              |
| Faecalibacterium    | 0.998        | -19.826                            | -12794.555          | 12754.902 | 0.896        | -0.501                             |
| Lachnospiraceae     | <b>0.067</b> | 0.202                              | 0.045               | 0.360     | <b>0.092</b> | 0.243                              |
| Anaerostipes        | 0.855        | -0.424                             | -2.008              | 1.161     | 0.218        | -3.451                             |
| Blautia             | 0.816        | 0.699                              | -1.528              | 2.926     | 0.998        | 19.297                             |
| Butyrivibrio        | <b>0.020</b> | -0.570                             | -0.944              | -0.196    | 0.705        | -0.243                             |
| Clostridium         | <b>0.038</b> | -1.128                             | -1.962              | -0.294    | <b>0.013</b> | -1.227                             |
| Coprococcus         | <b>0.021</b> | 0.344                              | 0.109               | 0.580     | 0.243        | 0.287                              |
| Dorea               | 0.141        | -0.773                             | -1.530              | -0.017    | <b>0.014</b> | -1.011                             |

|                       |       |        |            |           |       |         |
|-----------------------|-------|--------|------------|-----------|-------|---------|
| Lachnospira           | 0.042 | 2.215  | 0.531      | 3.898     | 0.731 | 0.709   |
| Moryella              | 0.807 | 0.210  | -0.423     | 0.844     | 0.602 | 0.286   |
| Oribacterium          | 0.374 | 0.949  | -0.346     | 2.243     | 0.998 | -0.240  |
| Roseburia             | 0.795 | -0.606 | -2.327     | 1.115     | 0.998 | -0.236  |
| Shuttleworthia        | 0.486 | 0.442  | -0.308     | 1.192     | 0.243 | -0.842  |
| Peptostreptococcaceae | 0.893 | -0.402 | -2.383     | 1.580     | 0.527 | -6.278  |
| Ruminococcaceae       | 0.574 | 0.118  | -0.104     | 0.340     | 0.861 | -0.071  |
| Ethanoligenens        | 0.998 | -0.064 | -1.397     | 1.270     | 0.998 | -0.190  |
| Oscillospira          | 0.427 | 0.129  | -0.065     | 0.323     | 0.243 | -0.176  |
| Ruminococcus          | 0.017 | 0.328  | 0.136      | 0.520     | 0.069 | 0.345   |
| Erysipelotrichi       | 0.334 | 0.371  | -0.221     | 0.963     | 0.240 | 0.687   |
| Erysipelotrichales    | 0.355 | 0.371  | -0.221     | 0.963     | 0.311 | 0.687   |
| Erysipelotrichaceae   | 0.454 | 0.371  | -0.221     | 0.963     | 0.240 | 0.687   |
| Allobaculum           | 0.952 | 0.296  | -1.880     | 2.472     | 0.998 | 18.991  |
| Coprobacillus         | 0.855 | 0.222  | -0.600     | 1.043     | 0.130 | 0.804   |
| Turicibacter          | 0.021 | -3.161 | -5.293     | -1.030    | 0.998 | -20.844 |
| cc_115                | 0.427 | 0.456  | -0.256     | 1.168     | 0.998 | 0.109   |
| Turicibacteraceae     | 0.033 | -3.161 | -5.293     | -1.030    | 0.998 | -20.844 |
| Turicibacterales      | 0.019 | -3.161 | -5.293     | -1.030    | 0.998 | -20.844 |
| Dehalobacteriaceae    | 0.067 | 0.469  | 0.099      | 0.838     | 0.936 | 0.097   |
| Dehalobacterium       | 0.051 | 0.469  | 0.099      | 0.838     | 0.998 | 0.097   |
| SMB53                 | 0.998 | 19.176 | -12109.558 | 12147.911 |       |         |
| Candidatus_Arthromi   | 0.795 | 1.995  | -3.531     | 7.520     | 0.998 | -0.482  |
| Paenibacillaceae      | 0.317 | -1.792 | -4.069     | 0.486     |       |         |
| Paenibacillus         | 0.340 | -1.792 | -4.069     | 0.486     |       |         |
| Geobacillus           |       |        |            |           |       |         |
| <b>Bacterioidetes</b> | 0.039 | -0.771 | -1.300     | -0.242    | 0.148 | -0.556  |
| Bacteriodia           | 0.017 | -0.771 | -1.300     | -0.242    | 0.164 | -0.556  |
| Bacteroidales         | 0.019 | -0.771 | -1.300     | -0.242    | 0.230 | -0.556  |
| S24-7                 | 0.033 | -0.771 | -1.300     | -0.242    | 0.162 | -0.556  |
| Cytophagia            | 0.017 | -2.878 | -4.733     | -1.024    | 0.740 | -0.384  |
| Cytophagales          | 0.019 | -2.878 | -4.733     | -1.024    | 0.963 | -0.384  |
| Flammeovirgaceae      | 0.033 | -2.878 | -4.733     | -1.024    | 0.936 | -0.384  |
| Persicobacter         | 0.020 | -2.878 | -4.733     | -1.024    | 0.998 | -0.384  |
| <b>Tenericutes</b>    | 0.396 | -0.401 | -1.161     | 0.359     | 0.412 | -0.366  |
| Mollicutes            | 0.410 | -0.401 | -1.161     | 0.359     | 0.499 | -0.366  |
| Anaeroplasmatales     | 0.905 | -0.154 | -1.037     | 0.729     | 0.748 | -0.500  |
| Anaeroplasmataceae    | 0.908 | -0.154 | -1.037     | 0.729     | 0.802 | -0.500  |
| Anaeroplasma          | 0.906 | -0.154 | -1.037     | 0.729     | 0.705 | -0.500  |
| RF39                  | 0.165 | -0.866 | -1.779     | 0.047     | 0.832 | -0.307  |
| Unclassified_Family   | 0.198 | -0.846 | -1.740     | 0.049     | 0.903 | -0.301  |

|                        |       |         |            |           |       |         |
|------------------------|-------|---------|------------|-----------|-------|---------|
| Unclassified_Genus     | 0.020 | -0.768  | -1.275     | -0.260    | 0.130 | -0.545  |
| Acholeplasmatales      | 0.089 | -2.485  | -4.726     | -0.243    | 0.998 | -19.668 |
| Acholeplasmataceae     | 0.116 | -2.485  | -4.726     | -0.243    | 0.998 | -19.668 |
| Candidatus_Phytoplasma | 0.108 | -2.485  | -4.726     | -0.243    | 0.998 | -19.668 |
| <b>Fusobacteria</b>    | 0.239 | -4.140  | -9.540     | 1.261     | 0.412 | -3.027  |
| Fusobacteriia          | 0.249 | -4.140  | -9.540     | 1.261     | 0.329 | -3.027  |
| Fusobacteriales        | 0.254 | -4.140  | -9.540     | 1.261     | 0.518 | -3.027  |
| Leptotrichiaceae       | 0.317 | -4.140  | -9.540     | 1.261     | 0.527 | -3.027  |
| Streptobacillus        | 0.347 | -4.140  | -9.540     | 1.261     | 0.473 | -3.027  |
| <b>Actinobacteria</b>  | 0.754 | 0.124   | -0.446     | 0.694     | 0.052 | -0.690  |
| Actinobacteria         | 0.826 | -0.385  | -2.461     | 1.690     | 0.899 | -0.179  |
| Actinomycetales        | 0.905 | -0.385  | -2.461     | 1.690     | 0.998 | -0.179  |
| Micrococcaceae         | 0.997 | 19.137  | -7122.826  | 7161.099  | 0.861 | -0.858  |
| Coriobacteriia         | 0.811 | 0.135   | -0.446     | 0.716     | 0.041 | -0.691  |
| Coriobacteriales       | 0.905 | 0.135   | -0.446     | 0.716     | 0.099 | -0.691  |
| Coriobacteriaceae      | 0.893 | 0.135   | -0.446     | 0.716     | 0.041 | -0.691  |
| Adlercreutzia          | 0.876 | 0.136   | -0.454     | 0.726     | 0.069 | -0.647  |
| Nocardiaceae           | 0.997 | -19.850 | -11373.377 | 11333.676 | 0.998 | 0.504   |
| Rhodococcus            | 0.998 | -19.850 | -11373.377 | 11333.676 | 0.998 | 0.504   |
| Nesterenkonia          | 0.998 | 19.137  | -7122.826  | 7161.099  |       |         |
| Coriobacterium         |       |         |            |           |       |         |
| Arthrobacter           |       |         |            |           | 0.788 | -0.858  |
| Microbacteriaceae      |       |         |            |           |       |         |
| Microbacterium         |       |         |            |           |       |         |
| Propionibacteriaceae   |       |         |            |           |       |         |
| Propionibacterium      |       |         |            |           |       |         |
| Bifidobacteriales      |       |         |            |           |       |         |
| Bifidobacteriaceae     |       |         |            |           |       |         |
| Bifidobacterium        |       |         |            |           |       |         |
| Atopobium              |       |         |            |           |       |         |
| <b>Proteobacteria</b>  | 0.396 | 1.109   | -1.023     | 3.240     | 0.412 | 0.980   |
| Alphaproteobacteria    | 0.240 | 1.804   | -0.384     | 3.992     | 0.329 | -1.426  |
| Rhizobiales            | 0.285 | 1.685   | -0.682     | 4.051     | 0.311 | -2.115  |
| Rhizobiaceae           | 0.361 | 1.685   | -0.682     | 4.051     | 0.247 | -2.115  |
| Betaproteobacteria     | 0.977 | 0.024   | -1.591     | 1.639     | 0.899 | -0.183  |
| Burkholderiales        | 0.996 | 0.024   | -1.591     | 1.639     | 0.998 | -0.183  |
| Comamonadaceae         | 0.997 | 0.024   | -1.591     | 1.639     | 0.998 | -0.183  |
| Delftia                | 0.876 | -0.382  | -2.129     | 1.366     | 0.998 | 19.345  |
| Agrobacterium          | 0.383 | 1.685   | -0.682     | 4.051     | 0.243 | -2.115  |
| Gammaproteobacteria    | 0.334 | 1.849   | -1.125     | 4.824     | 0.329 | 1.829   |
| Enterobacteriales      | 0.501 | 1.467   | -1.510     | 4.443     | 0.998 | 18.933  |

|                        |       |        |           |          |       |         |
|------------------------|-------|--------|-----------|----------|-------|---------|
| Enterobacteriaceae     | 0.581 | 1.467  | -1.510    | 4.443    | 0.998 | 18.933  |
| Klebsiella             | 0.610 | 1.467  | -1.510    | 4.443    | 0.998 | 18.933  |
| Pseudomonadales        | 0.996 | 18.062 | -5881.765 | 5917.890 | 0.998 | 19.875  |
| Xanthomonadales        | 0.996 | 19.086 | -7678.454 | 7716.627 | 0.998 | -19.648 |
| Xanthomonadaceae       | 0.997 | 19.086 | -7678.454 | 7716.627 | 0.998 | -19.648 |
| Stenotrophomonas       | 0.998 | 19.086 | -7678.454 | 7716.627 | 0.998 | -19.648 |
| Pseudomonadaceae       | 0.997 | 18.062 | -5881.765 | 5917.890 |       |         |
| Pseudomonas            | 0.998 | 18.062 | -5881.765 | 5917.890 |       |         |
| Moraxellaceae          |       |        |           |          | 0.998 | 20.805  |
| Acinetobacter          |       |        |           |          | 0.998 | 20.805  |
| Leptothrix             |       |        |           |          | 0.998 | -19.748 |
| Caulobacterales        |       |        |           |          |       |         |
| Caulobacteraceae       |       |        |           |          |       |         |
| Phenylobacterium       |       |        |           |          |       |         |
| Bradyrhizobiaceae      |       |        |           |          |       |         |
| Afipia                 |       |        |           |          |       |         |
| Sphingomonadales       |       |        |           |          |       |         |
| Sphingomonadaceae      |       |        |           |          |       |         |
| Sphingomonas           |       |        |           |          |       |         |
| Rhodobacterales        |       |        |           |          |       |         |
| Rhodobacteraceae       |       |        |           |          |       |         |
| Paracoccus             |       |        |           |          |       |         |
| Deltaproteobacteria    |       |        |           |          |       |         |
| Desulfovibrionales     |       |        |           |          |       |         |
| Desulfovibrionaceae    |       |        |           |          |       |         |
| Desulfovibrio          |       |        |           |          |       |         |
| <b>Verrucomicrobia</b> | 0.239 | 2.018  | -0.471    | 4.507    | 0.589 | 0.338   |
| Verrucomicrobiae       | 0.240 | 2.018  | -0.471    | 4.507    | 0.737 | 0.338   |
| Verrucomicrobiales     | 0.235 | 2.018  | -0.471    | 4.507    | 0.952 | 0.338   |
| Verrucomicrobiaceae    | 0.316 | 2.018  | -0.471    | 4.507    | 0.936 | 0.338   |
| Akkermansia            | 0.329 | 2.018  | -0.471    | 4.507    | 0.998 | 0.338   |
| <b>Cyanobacteria</b>   | 0.239 | 1.187  | -0.237    | 2.611    | 0.412 | 1.217   |
| Chloroplast            | 0.240 | 1.187  | -0.237    | 2.611    | 0.499 | 1.217   |
| Streptophyta           | 0.235 | 1.187  | -0.237    | 2.611    | 0.769 | 1.217   |
| <b>Chlorobi</b>        | 0.823 | -0.107 | -1.042    | 0.829    | 0.412 | -0.998  |
| BSV26                  | 0.882 | -0.107 | -1.042    | 0.829    | 0.329 | -0.998  |
| BSN164                 | 0.961 | -0.107 | -1.042    | 0.829    | 0.518 | -0.998  |
| <b>Acidobacteria</b>   |       |        |           |          |       |         |
| DA052                  |       |        |           |          |       |         |
| Ellin6513              |       |        |           |          |       |         |

Highlighted cells are considered statistically significant at q-values <0.1.

| Confidence Interval |          | DAY 15       |                                    |                     |                                    | DAY 23       |                                    |                     |                                    |
|---------------------|----------|--------------|------------------------------------|---------------------|------------------------------------|--------------|------------------------------------|---------------------|------------------------------------|
|                     |          | 2.50% 97.5%% |                                    | Confidence Interval |                                    | 2.50% 97.50% |                                    | Confidence Interval |                                    |
|                     |          | q-value      | Fold change<br>( <i>obob</i> /Het) | q-value             | Fold change<br>( <i>obob</i> /Het) | q-value      | Fold change<br>( <i>obob</i> /Het) | q-value             | Fold change<br>( <i>obob</i> /Het) |
| -0.075              | 0.205    | 0.196        | -0.101                             | -0.199              | -0.003                             | <b>0.000</b> | -0.210                             |                     |                                    |
| -1.097              | -0.221   | 0.997        | -0.105                             | -0.613              | 0.402                              | <b>0.005</b> | -0.752                             |                     |                                    |
| -0.422              | 0.981    | 0.163        | -0.585                             | -1.122              | -0.049                             | <b>0.009</b> | 0.607                              |                     |                                    |
| -0.431              | 1.014    | 0.104        | -0.691                             | -1.314              | -0.068                             | 0.387        | 0.374                              |                     |                                    |
| -0.433              | 1.012    | 0.168        | -0.697                             | -1.324              | -0.071                             | 0.400        | 0.375                              |                     |                                    |
| -1.841              | 1.511    | 0.756        | -1.078                             | -3.393              | 1.237                              | 0.623        | 1.109                              |                     |                                    |
| -1.841              | 1.511    | 0.675        | -1.078                             | -3.393              | 1.237                              | 0.617        | 1.109                              |                     |                                    |
| -1.479              | 1.141    | 0.847        | 0.320                              | -0.893              | 1.534                              | <b>0.054</b> | 1.212                              |                     |                                    |
| -1.479              | 1.141    | 0.870        | 0.320                              | -0.893              | 1.534                              | <b>0.059</b> | 1.212                              |                     |                                    |
| -1.043              | -0.146   | 0.997        | -0.090                             | -0.612              | 0.432                              | <b>0.006</b> | -0.777                             |                     |                                    |
| -3.414              | -1.785   | 0.190        | -0.815                             | -1.669              | 0.038                              | <b>0.001</b> | -1.449                             |                     |                                    |
| -3.414              | -1.785   | 0.233        | -0.815                             | -1.669              | 0.038                              | <b>0.001</b> | -1.449                             |                     |                                    |
| -0.673              | 1.071    | 0.822        | -0.134                             | -0.580              | 0.313                              | 0.997        | 0.109                              |                     |                                    |
| 0.388               | 1.676    | <b>0.001</b> | 0.909                              | 0.445               | 1.373                              | 0.997        | 0.049                              |                     |                                    |
| 0.393               | 1.683    | <b>0.002</b> | 0.913                              | 0.448               | 1.378                              | 1.000        | 0.051                              |                     |                                    |
| -0.204              | 1.216    | 0.252        | 0.542                              | -0.080              | 1.164                              | 1.000        | 0.004                              |                     |                                    |
| 0.107               | 3.662    | <b>0.064</b> | 2.379                              | 0.443               | 4.314                              | <b>0.064</b> | 2.553                              |                     |                                    |
| 0.107               | 3.662    | 0.120        | 2.379                              | 0.443               | 4.314                              | <b>0.067</b> | 2.553                              |                     |                                    |
| -0.031              | 0.232    | <b>0.000</b> | -0.217                             | -0.319              | -0.114                             | <b>0.005</b> | -0.175                             |                     |                                    |
| -0.031              | 0.232    | <b>0.000</b> | -0.217                             | -0.319              | -0.114                             | <b>0.006</b> | -0.175                             |                     |                                    |
| 0.452               | 1.821    | 0.843        | 0.070                              | -0.158              | 0.297                              | <b>0.011</b> | -0.309                             |                     |                                    |
| -1.218              | 0.763    | 0.225        | -0.674                             | -1.430              | 0.082                              | 0.387        | 0.525                              |                     |                                    |
| -1.251              | 0.811    | 0.233        | -0.779                             | -1.585              | 0.027                              | 0.614        | 0.484                              |                     |                                    |
| -1.924              | -0.523   | <b>0.000</b> | -1.666                             | -2.441              | -0.890                             | 0.190        | -1.118                             |                     |                                    |
| 0.399               | 1.676    | 0.223        | 0.552                              | 0.016               | 1.088                              | <b>0.004</b> | 0.956                              |                     |                                    |
| -1.914              | 0.912    | 0.789        | -4.706                             | -18.144             | 8.731                              | 1.000        | 0.269                              |                     |                                    |
| 0.046               | 0.440    | <b>0.000</b> | -0.311                             | -0.460              | -0.161                             | 0.131        | -0.170                             |                     |                                    |
| -7.002              | 0.100    | 0.528        | -1.630                             | -4.160              | 0.899                              | 1.000        | -19.392                            |                     |                                    |
| -7929.271           | 7967.864 | 0.236        | 1.600                              | -0.172              | 3.372                              | 0.670        | -1.511                             |                     |                                    |
| -0.725              | 0.238    | 0.789        | -0.197                             | -0.672              | 0.278                              | 1.000        | -0.049                             |                     |                                    |
| -1.924              | -0.529   | <b>0.000</b> | -1.772                             | -2.557              | -0.987                             | 0.217        | -1.142                             |                     |                                    |
| -0.039              | 0.613    | 0.870        | 0.078                              | -0.217              | 0.373                              | <b>0.000</b> | 0.742                              |                     |                                    |
| -1.648              | -0.373   | 0.233        | -0.662                             | -1.366              | 0.043                              | <b>0.083</b> | -0.775                             |                     |                                    |



|           |          |       |         |           |          |       |         |
|-----------|----------|-------|---------|-----------|----------|-------|---------|
| -0.777    | 2.196    | 0.340 | -2.539  | -5.788    | 0.711    | 1.000 | -0.207  |
| -0.200    | 0.773    | 0.236 | -0.530  | -1.114    | 0.054    | 0.011 | -1.020  |
| -1.258    | 0.778    | 0.032 | -2.279  | -3.771    | -0.787   | 0.067 | -2.820  |
| -1.651    | 1.179    | 0.997 | 20.159  | -9658.541 | 9698.859 | 0.871 | -0.683  |
| -1.753    | 0.069    | 0.789 | -0.596  | -2.300    | 1.108    | 0.257 | -1.079  |
| -15.735   | 3.179    | 0.030 | -1.407  | -2.420    | -0.394   | 0.026 | -1.359  |
| -0.248    | 0.106    | 0.813 | -0.049  | -0.200    | 0.101    | 0.154 | -0.116  |
| -1.150    | 0.771    | 0.997 | 0.124   | -0.610    | 0.858    | 0.614 | -0.482  |
| -0.375    | 0.024    | 0.233 | -0.161  | -0.322    | 0.001    | 0.004 | -0.297  |
| 0.076     | 0.613    | 0.105 | -0.288  | -0.511    | -0.065   | 0.010 | -0.420  |
| -0.040    | 1.414    | 0.000 | 0.929   | 0.556     | 1.302    | 0.943 | 0.053   |
| -0.040    | 1.414    | 0.000 | 0.929   | 0.556     | 1.302    | 0.997 | 0.053   |
| -0.040    | 1.414    | 0.000 | 0.929   | 0.556     | 1.302    | 0.997 | 0.053   |
| -7817.881 | 7855.863 | 0.997 | 0.111   | -2.034    | 2.256    | 0.400 | -1.087  |
| 0.085     | 1.524    | 0.000 | 0.928   | 0.527     | 1.329    | 0.459 | 0.214   |
| -7102.513 | 7060.826 | 0.997 | -21.804 | -6982.617 | 6939.010 | 1.000 | -20.300 |
| -1.034    | 1.251    | 0.120 | 1.072   | 0.182     | 1.963    | 1.000 | 0.323   |
| -7102.513 | 7060.826 | 0.997 | -21.804 | -6982.617 | 6939.010 | 0.997 | -20.300 |
| -7102.513 | 7060.826 | 0.997 | -21.804 | -6982.617 | 6939.010 | 0.997 | -20.300 |
| -0.249    | 0.443    | 0.621 | -0.184  | -0.538    | 0.171    | 0.013 | -0.423  |
| -0.249    | 0.443    | 0.680 | -0.184  | -0.538    | 0.171    | 0.010 | -0.423  |
|           |          | 0.997 | 19.369  | -7403.685 | 7442.423 | 1.000 | 19.683  |
| -3.042    | 2.078    |       |         |           |          |       |         |
|           |          | 0.997 | 0.162   | -1.408    | 1.732    | 1.000 | 0.000   |
| -1.066    | -0.046   | 0.997 | -0.043  | -0.407    | 0.322    | 0.027 | 0.495   |
| -1.066    | -0.045   | 0.997 | -0.043  | -0.407    | 0.322    | 0.035 | 0.495   |
| -1.066    | -0.045   | 0.997 | -0.043  | -0.407    | 0.322    | 0.034 | 0.495   |
| -1.066    | -0.045   | 0.997 | -0.043  | -0.407    | 0.322    | 0.054 | 0.495   |
| -2.001    | 1.233    |       |         |           |          | 0.997 | -19.506 |
| -2.001    | 1.233    |       |         |           |          | 0.997 | -19.506 |
| -2.001    | 1.233    |       |         |           |          | 0.997 | -19.506 |
| -2.001    | 1.233    |       |         |           |          | 1.000 | -19.506 |
| -1.136    | 0.404    | 0.997 | -0.338  | -1.199    | 0.523    | 0.460 | 0.390   |
| -1.136    | 0.404    | 0.997 | -0.338  | -1.199    | 0.523    | 0.805 | 0.390   |
| -1.485    | 0.486    | 0.933 | -2.118  | -5.960    | 1.724    |       |         |
| -1.485    | 0.486    | 0.603 | -2.118  | -5.960    | 1.724    |       |         |
| -1.485    | 0.486    | 0.644 | -2.118  | -5.960    | 1.724    |       |         |
| -1.148    | 0.535    | 0.997 | -0.334  | -1.197    | 0.530    | 0.838 | 0.390   |
| -1.141    | 0.538    | 0.739 | -0.331  | -1.187    | 0.525    | 0.617 | 0.390   |

|            |           |       |         |           |          |       |         |
|------------|-----------|-------|---------|-----------|----------|-------|---------|
| -1.029     | -0.061    | 0.789 | -0.111  | -0.432    | 0.210    | 0.125 | 0.353   |
| -13467.087 | 13427.752 |       |         |           |          |       |         |
| -13467.087 | 13427.752 |       |         |           |          |       |         |
| -13467.087 | 13427.752 |       |         |           |          |       |         |
| -7.503     | 1.449     | 0.997 | -0.133  | -2.467    | 2.202    | 0.997 | 20.073  |
| -7.503     | 1.449     | 0.997 | -0.133  | -2.467    | 2.202    | 0.997 | 20.073  |
| -7.503     | 1.449     | 0.997 | -0.133  | -2.467    | 2.202    | 0.997 | 20.073  |
| -7.503     | 1.449     | 0.997 | -0.133  | -2.467    | 2.202    | 0.997 | 20.073  |
| -7.503     | 1.449     | 0.997 | -0.133  | -2.467    | 2.202    | 1.000 | 20.073  |
| -1.180     | -0.200    | 0.002 | -1.244  | -1.899    | -0.590   | 0.000 | -1.694  |
| -2.234     | 1.877     | 0.703 | -0.869  | -2.202    | 0.463    | 0.943 | -0.279  |
| -2.234     | 1.877     | 0.997 | -0.572  | -1.933    | 0.788    | 0.997 | -0.279  |
| -2.830     | 1.114     | 0.603 | -0.972  | -2.629    | 0.686    | 0.997 | -18.927 |
| -1.178     | -0.203    | 0.001 | -1.245  | -1.902    | -0.588   | 0.000 | -1.697  |
| -1.178     | -0.203    | 0.001 | -1.245  | -1.902    | -0.588   | 0.000 | -1.697  |
| -1.178     | -0.203    | 0.001 | -1.245  | -1.902    | -0.588   | 0.000 | -1.697  |
| -1.153     | -0.142    | 0.921 | 0.094   | -0.327    | 0.516    | 0.577 | -0.262  |
| -2.489     | 3.496     |       |         |           |          | 0.997 | 19.533  |
| -2.489     | 3.496     |       |         |           |          | 1.000 | 19.533  |
|            |           | 0.789 | -0.960  | -3.576    | 1.656    | 0.789 | -0.960  |
|            |           |       |         |           |          | 1.000 | -19.571 |
| -2.830     | 1.114     | 0.789 | -0.983  | -3.609    | 1.643    | 1.000 | -20.175 |
|            |           | 0.997 | -20.351 | -7515.845 | 7475.142 |       |         |
|            |           | 0.997 | -20.351 | -7515.845 | 7475.142 |       |         |
|            |           | 0.997 | -20.351 | -7515.845 | 7475.142 |       |         |
|            |           | 0.997 | -19.291 | -7643.708 | 7605.126 | 1.000 | -19.602 |
| -0.941     | 2.900     | 0.997 | 0.217   | -1.200    | 1.635    | 0.400 | 0.833   |
| -3.509     | 0.658     | 0.997 | 0.093   | -1.311    | 1.497    | 0.943 | 0.482   |
| -4.437     | 0.206     | 0.997 | -0.623  | -2.206    | 0.961    | 0.997 | 0.195   |
| -4.437     | 0.206     | 0.739 | -0.623  | -2.206    | 0.961    | 0.997 | 0.195   |
| -3.008     | 2.642     | 0.997 | -20.663 | -9614.218 | 9572.893 | 0.997 | 18.501  |
| -3.008     | 2.642     | 0.997 | -20.663 | -9614.218 | 9572.893 | 0.997 | 18.501  |
| -3.008     | 2.642     | 0.997 | -20.663 | -9614.218 | 9572.893 | 0.997 | 18.501  |
| -8845.648  | 8884.338  | 0.997 | -19.451 | -6801.632 | 6762.730 | 0.997 | -19.451 |
| -4.437     | 0.206     | 0.789 | -0.623  | -2.206    | 0.961    | 1.000 | 0.195   |
| -0.948     | 4.607     | 0.997 | 0.642   | -1.315    | 2.599    | 0.811 | 0.850   |
| -8242.987  | 8280.854  | 0.933 | 1.260   | -0.930    | 3.451    | 0.997 | 0.661   |

|            |           |          |            |            |           |       |        |
|------------|-----------|----------|------------|------------|-----------|-------|--------|
| -8242.987  | 8280.854  | 0.603    | 1.260      | -0.930     | 3.451     | 0.881 | 0.661  |
| -8242.987  | 8280.854  | 0.628    | 1.260      | -0.930     | 3.451     | 0.883 | 0.661  |
| -7933.308  | 7973.058  | 0.997    | -19.001    | -6780.326  | 6742.325  | 0.997 | 20.416 |
| -8628.202  | 8588.907  |          |            |            |           |       |        |
| -8628.202  | 8588.907  |          |            |            |           |       |        |
| -8628.202  | 8588.907  |          |            |            |           |       |        |
|            |           | 0.997    | -20.237    | -11222.247 | 11181.773 | 0.997 | 19.533 |
|            |           | 0.997    | -20.237    | -11222.247 | 11181.773 | 1.000 | 19.533 |
| -11876.963 | 11918.574 |          |            |            |           |       |        |
| -11876.963 | 11918.574 |          |            |            |           |       |        |
| -11504.790 | 11465.294 |          |            |            |           |       |        |
|            |           | 0.997    | 0.116      | -2.255     | 2.487     |       |        |
|            |           | 0.997    | 0.116      | -2.255     | 2.487     |       |        |
|            |           | 0.997    | 0.116      | -2.255     | 2.487     |       |        |
|            |           |          |            |            |           |       |        |
|            |           |          |            |            |           |       |        |
|            |           |          |            |            |           |       |        |
|            |           |          |            |            |           |       |        |
| -0.890     | 1.567     | 0.997    | -0.047     | -1.057     | 0.964     | 0.389 | -0.598 |
| -0.890     | 1.567     | 0.997    | -0.047     | -1.057     | 0.964     | 0.544 | -0.598 |
| -0.890     | 1.567     | 0.997    | -0.047     | -1.057     | 0.964     | 0.551 | -0.598 |
| -0.890     | 1.567     | 0.997    | -0.047     | -1.057     | 0.964     | 0.404 | -0.598 |
| -0.890     | 1.567     | 0.997    | -0.047     | -1.057     | 0.964     | 0.459 | -0.598 |
| -1.422     | 3.855     |          |            |            |           |       |        |
| -1.422     | 3.855     |          |            |            |           |       |        |
| -1.422     | 3.855     |          |            |            |           |       |        |
| -2.515     | 0.520     | 0.997    | -0.057     | -1.114     | 1.000     | 0.752 | 0.302  |
| -2.515     | 0.520     | 0.997    | -0.057     | -1.114     | 1.000     | 0.943 | 0.302  |
| -2.515     | 0.520     | 0.997    | -0.057     | -1.114     | 1.000     | 0.997 | 0.302  |
|            |           | 0.997    | -19.459    | -10738.367 | 10699.449 |       |        |
|            |           | 0.997    | -19.459    | -10738.367 | 10699.449 |       |        |
|            |           | 0.997161 | -19.458627 | -10738.367 | 10699.449 |       |        |

| Confidence Interval |          | DAY 31  |                                    | Confidence Interval |        | DAY 35  |
|---------------------|----------|---------|------------------------------------|---------------------|--------|---------|
| 2.50%               | 97.50%   | q-value | Fold change<br>( <i>obob</i> /Het) | 2.50%               | 97.50% | q value |
| -0.302              | -0.119   | 0.719   | -0.040                             | -0.198              | 0.119  | 0.997   |
| -1.194              | -0.310   | 0.210   | 0.473                              | -0.058              | 1.004  | 0.150   |
| 0.219               | 0.994    | 0.523   | 0.241                              | -0.115              | 0.597  | 0.197   |
| -0.147              | 0.894    | 0.850   | 0.133                              | -0.238              | 0.504  | 0.482   |
| -0.141              | 0.891    | 0.910   | 0.133                              | -0.238              | 0.504  | 0.654   |
| -1.103              | 3.320    | 0.931   | 0.455                              | -0.943              | 1.852  | 0.998   |
| -1.103              | 3.320    | 0.873   | 0.455                              | -0.943              | 1.852  | 0.949   |
| 0.266               | 2.158    | 0.850   | 0.531                              | -0.748              | 1.811  | 0.482   |
| 0.266               | 2.158    | 0.910   | 0.531                              | -0.748              | 1.811  | 0.654   |
| -1.230              | -0.324   | 0.356   | 0.478                              | -0.064              | 1.019  | 0.187   |
| -2.147              | -0.750   | 0.691   | 0.481                              | -0.267              | 1.229  | 0.455   |
| -2.147              | -0.750   | 0.827   | 0.481                              | -0.267              | 1.229  | 0.512   |
| -0.403              | 0.622    | 0.879   | 0.129                              | -0.301              | 0.558  | 0.949   |
| -0.536              | 0.634    | 0.850   | 0.176                              | -0.287              | 0.639  | 0.010   |
| -0.542              | 0.644    | 0.910   | 0.177                              | -0.289              | 0.644  | 0.007   |
| -0.458              | 0.466    | 0.997   | 0.059                              | -0.368              | 0.486  | 0.076   |
| 0.463               | 4.643    | 0.084   | 2.582                              | 0.528               | 4.637  | 0.434   |
| 0.463               | 4.643    | 0.086   | 2.582                              | 0.528               | 4.637  | 0.482   |
| -0.278              | -0.071   | 0.004   | -0.239                             | -0.377              | -0.102 | 0.002   |
| -0.278              | -0.071   | 0.006   | -0.239                             | -0.377              | -0.102 | 0.003   |
| -0.505              | -0.114   | 0.833   | -0.128                             | -0.351              | 0.095  | 0.998   |
| -0.229              | 1.279    | 0.551   | 0.736                              | -0.259              | 1.731  | 0.949   |
| -0.445              | 1.414    | 0.827   | 0.741                              | -0.453              | 1.935  | 0.998   |
| -2.331              | 0.094    | 0.919   | -0.191                             | -0.999              | 0.617  | 0.926   |
| 0.426               | 1.485    | 0.086   | 0.722                              | 0.134               | 1.311  | 0.076   |
| -1.263              | 1.800    | 0.982   | -0.481                             | -2.360              | 1.397  | 0.998   |
| -0.331              | -0.009   | 0.084   | -0.253                             | -0.454              | -0.051 | 0.012   |
| -7034.885           | 6996.101 | 0.997   | -0.216                             | -2.418              | 1.986  | 0.998   |
| -4.784              | 1.763    | 0.997   | -0.073                             | -1.598              | 1.451  | 0.998   |
| -0.514              | 0.416    | 0.843   | 0.201                              | -0.165              | 0.567  | 0.998   |
| -2.373              | 0.090    | 0.982   | -0.196                             | -1.006              | 0.613  | 0.998   |
| 0.450               | 1.035    | 0.162   | 0.386                              | 0.030               | 0.742  | 0.998   |
| -1.440              | -0.109   | 0.086   | -1.516                             | -2.737              | -0.296 | 0.076   |

|           |          |       |         |           |          |       |
|-----------|----------|-------|---------|-----------|----------|-------|
| -2.138    | 1.724    | 0.982 | 0.384   | -1.141    | 1.910    | 0.998 |
| -1.667    | -0.373   | 0.018 | -1.228  | -1.994    | -0.463   | 0.005 |
| -5.117    | -0.523   | 0.828 | -0.588  | -1.571    | 0.395    | 0.998 |
| -2.644    | 1.278    | 0.910 | -0.691  | -2.494    | 1.111    | 0.998 |
| -2.318    | 0.159    | 0.910 | -0.450  | -1.404    | 0.504    | 0.798 |
| -2.282    | -0.437   | 0.528 | -0.337  | -0.766    | 0.091    | 0.949 |
| -0.233    | 0.001    | 0.053 | -0.234  | -0.398    | -0.069   | 0.028 |
| -1.387    | 0.423    | 0.881 | 0.290   | -0.272    | 0.853    | 0.998 |
| -0.461    | -0.134   | 0.000 | -0.435  | -0.620    | -0.250   | 0.000 |
| -0.672    | -0.167   | 0.013 | -0.467  | -0.740    | -0.194   | 0.076 |
| -0.261    | 0.367    | 0.092 | 0.421   | 0.044     | 0.797    | 0.177 |
| -0.261    | 0.367    | 0.161 | 0.421   | 0.044     | 0.797    | 0.197 |
| -0.261    | 0.367    | 0.142 | 0.421   | 0.044     | 0.797    | 0.293 |
| -2.577    | 0.403    | 0.997 | 0.094   | -0.641    | 0.829    | 0.998 |
| -0.112    | 0.539    | 0.018 | 0.568   | 0.211     | 0.926    | 0.076 |
| -6003.957 | 5963.356 | 0.997 | -19.780 | -7276.919 | 7237.359 | 0.998 |
| -1.200    | 1.847    | 0.077 | 1.022   | 0.248     | 1.796    | 0.482 |
| -6003.957 | 5963.356 | 0.997 | -19.780 | -7276.919 | 7237.359 | 0.949 |
| -6003.957 | 5963.356 | 0.997 | -19.780 | -7276.919 | 7237.359 | 0.993 |
| -0.683    | -0.164   | 0.003 | -0.680  | -1.024    | -0.336   | 0.296 |
| -0.683    | -0.164   | 0.003 | -0.680  | -1.024    | -0.336   | 0.333 |
| -9036.523 | 9075.889 | 0.741 | 1.065   | -0.456    | 2.586    | 0.998 |
| -2.163    | 2.162    |       |         |           |          | 0.998 |
| 0.118     | 0.871    | 0.496 | 0.162   | -0.150    | 0.474    | 0.997 |
| 0.118     | 0.871    | 0.403 | 0.162   | -0.150    | 0.474    | 0.997 |
| 0.118     | 0.871    | 0.585 | 0.162   | -0.150    | 0.474    | 0.997 |
| 0.118     | 0.871    | 0.845 | 0.162   | -0.150    | 0.474    | 0.998 |
| -9625.098 | 9586.085 |       |         |           |          |       |
| -9625.098 | 9586.085 |       |         |           |          |       |
| -9625.098 | 9586.085 |       |         |           |          |       |
| -9625.098 | 9586.085 |       |         |           |          |       |
| -0.420    | 1.200    | 0.496 | 0.511   | -0.366    | 1.387    | 0.997 |
| -0.420    | 1.200    | 0.403 | 0.511   | -0.366    | 1.387    | 0.874 |
| -0.420    | 1.200    | 0.585 | 0.511   | -0.366    | 1.387    | 0.993 |
| -0.415    | 1.195    | 0.738 | 0.513   | -0.354    | 1.380    | 0.949 |

|            |           |       |         |            |           |       |
|------------|-----------|-------|---------|------------|-----------|-------|
| 0.022      | 0.684     | 0.910 | 0.095   | -0.162     | 0.352     | 0.998 |
| -10830.352 | 10870.499 | 0.750 | -0.425  | -3.039     | 2.189     | 0.997 |
| -10830.352 | 10870.499 | 0.750 | -0.425  | -3.039     | 2.189     | 0.997 |
| -10830.352 | 10870.499 | 0.911 | -0.425  | -3.039     | 2.189     | 0.997 |
| -10830.352 | 10870.499 | 0.978 | -0.425  | -3.039     | 2.189     | 0.998 |
| -10830.352 | 10870.499 | 0.997 | -0.425  | -3.039     | 2.189     | 0.998 |
| -2.291     | -1.096    | 0.005 | -1.073  | -1.691     | -0.454    | 0.044 |
| -1.934     | 1.375     | 0.279 | 1.846   | -0.536     | 4.228     | 0.637 |
| -1.934     | 1.375     | 0.438 | 1.846   | -0.536     | 4.228     | 0.702 |
| -6035.147  | 5997.293  | 0.954 | -0.286  | -1.738     | 1.166     | 0.482 |
| -2.298     | -1.096    | 0.004 | -1.085  | -1.710     | -0.460    | 0.027 |
| -2.298     | -1.096    | 0.006 | -1.085  | -1.710     | -0.460    | 0.035 |
| -2.298     | -1.096    | 0.010 | -1.085  | -1.710     | -0.460    | 0.028 |
| -0.719     | 0.196     | 0.997 | -0.026  | -0.428     | 0.376     | 0.998 |
| -8384.177  | 8423.243  | 0.997 | 19.517  | -11113.043 | 11152.078 |       |
| -8384.177  | 8423.243  | 0.997 | 19.517  | -11113.043 | 11152.078 |       |
| -3.576     | 1.656     |       |         |            |           | 0.998 |
| -6716.070  | 6676.928  | 0.997 | -19.940 | -6916.171  | 6876.292  | 0.998 |
| -8518.400  | 8478.049  | 0.997 | -0.286  | -1.738     | 1.166     | 0.998 |
|            |           | 0.997 | 20.324  | -12026.885 | 12067.532 |       |
|            |           | 0.997 | 20.324  | -12026.885 | 12067.532 |       |
|            |           | 0.997 | 19.589  | -8324.096  | 8363.274  | 0.998 |
|            |           | 0.997 | 19.589  | -8324.096  | 8363.274  | 0.998 |
| -5245.100  | 5205.896  | 0.997 | -18.719 | -5504.945  | 5467.507  | 0.998 |
| -0.585     | 2.252     | 0.037 | 1.620   | 0.399      | 2.841     | 0.989 |
| -1.343     | 2.308     | 0.092 | 1.693   | 0.181      | 3.206     | 0.653 |
| -1.910     | 2.301     | 0.911 | -0.303  | -1.989     | 1.383     | 0.987 |
| -1.910     | 2.301     | 0.850 | -1.035  | -3.295     | 1.225     | 0.949 |
| -6318.984  | 6355.986  | 0.488 | -0.851  | -2.888     | 1.186     | 0.447 |
| -6318.984  | 6355.986  | 0.697 | -0.851  | -2.888     | 1.186     | 0.479 |
| -6318.984  | 6355.986  | 0.850 | -0.851  | -2.888     | 1.186     | 0.482 |
| -6801.632  | 6762.730  | 0.910 | -1.000  | -3.858     | 1.858     | 0.998 |
| -1.910     | 2.301     | 0.910 | -1.035  | -3.295     | 1.225     | 0.998 |
| -1.153     | 2.852     | 0.346 | 2.497   | -1.206     | 6.201     | 0.997 |
| -1.362     | 2.683     | 0.997 | 20.183  | -10355.462 | 10395.829 | 0.997 |

|           |          |       |         |            |           |       |
|-----------|----------|-------|---------|------------|-----------|-------|
| -1.362    | 2.683    | 0.997 | 20.183  | -10355.462 | 10395.829 | 0.998 |
| -1.362    | 2.683    | 0.997 | 20.183  | -10355.462 | 10395.829 | 0.998 |
| -9378.762 | 9419.595 | 0.697 | 0.699   | -1.118     | 2.516     |       |
|           |          |       |         |            |           | 0.997 |
|           |          |       |         |            |           | 0.998 |
|           |          |       |         |            |           | 0.998 |
| -8384.177 | 8423.243 | 0.850 | 0.699   | -1.118     | 2.516     |       |
| -8384.177 | 8423.243 | 0.910 | 0.699   | -1.118     | 2.516     |       |
|           |          |       |         |            |           |       |
|           |          | 0.997 | -19.228 | -9925.817  | 9887.362  | 0.998 |
|           |          |       |         |            |           |       |
|           |          | 0.997 | 19.820  | -9437.511  | 9477.151  | 0.998 |
|           |          | 0.997 | 19.820  | -9437.511  | 9477.151  | 0.998 |
|           |          | 0.997 | 19.762  | -6637.773  | 6677.297  |       |
|           |          | 0.997 | 19.762  | -6637.773  | 6677.297  |       |
|           |          | 0.997 | 19.762  | -6637.773  | 6677.297  |       |
|           |          |       |         |            |           | 0.997 |
|           |          |       |         |            |           | 0.998 |
|           |          |       |         |            |           | 0.998 |
|           |          |       |         |            |           | 0.997 |
|           |          |       |         |            |           | 0.997 |
|           |          |       |         |            |           | 0.998 |
| -1.502    | 0.305    | 0.719 | -0.212  | -1.070     | 0.647     | 0.989 |
| -1.502    | 0.305    | 0.682 | -0.212  | -1.070     | 0.647     | 0.653 |
| -1.502    | 0.305    | 0.891 | -0.212  | -1.070     | 0.647     | 0.840 |
| -1.502    | 0.305    | 0.919 | -0.212  | -1.070     | 0.647     | 0.833 |
| -1.502    | 0.305    | 0.982 | -0.212  | -1.070     | 0.647     | 0.998 |
|           |          |       |         |            |           |       |
| -1.035    | 1.639    | 0.496 | 0.626   | -0.508     | 1.759     | 0.989 |
| -1.035    | 1.639    | 0.403 | 0.626   | -0.508     | 1.759     | 0.769 |
| -1.035    | 1.639    | 0.585 | 0.626   | -0.508     | 1.759     | 0.987 |

| <b>Fold change<br/>(obob/Het)</b> | <b>Confidence Interval</b> |               |
|-----------------------------------|----------------------------|---------------|
|                                   | <b>2.50%</b>               | <b>97.50%</b> |
| -0.011                            | -0.152                     | 0.130         |
| 0.594                             | 0.051                      | 1.137         |
| -0.541                            | -1.093                     | 0.011         |
| -0.415                            | -1.027                     | 0.196         |
| -0.412                            | -1.024                     | 0.200         |
| -0.731                            | -3.709                     | 2.248         |
| -0.731                            | -3.709                     | 2.248         |
| -0.774                            | -1.897                     | 0.348         |
| -0.774                            | -1.897                     | 0.348         |
| 0.614                             | 0.055                      | 1.173         |
| 0.556                             | -0.155                     | 1.266         |
| 0.556                             | -0.155                     | 1.266         |
| 0.089                             | -0.307                     | 0.484         |
| 0.606                             | 0.273                      | 0.939         |
| 0.605                             | 0.269                      | 0.941         |
| 0.633                             | 0.137                      | 1.129         |
| 2.602                             | -0.542                     | 5.746         |
| 2.602                             | -0.542                     | 5.746         |
| -0.238                            | -0.362                     | -0.114        |
| -0.238                            | -0.362                     | -0.114        |
| -0.115                            | -0.365                     | 0.135         |
| 0.256                             | -0.992                     | 1.505         |
| 0.291                             | -1.169                     | 1.751         |
| 0.312                             | -0.492                     | 1.116         |
| 0.621                             | 0.156                      | 1.085         |
| -0.557                            | -2.521                     | 1.406         |
| -0.324                            | -0.513                     | -0.135        |
| 0.109                             | -2.028                     | 2.246         |
| 0.076                             | -1.259                     | 1.410         |
| 0.144                             | -0.332                     | 0.620         |
| 0.312                             | -0.492                     | 1.116         |
| 0.124                             | -0.157                     | 0.405         |
| -1.419                            | -2.515                     | -0.322        |



|         |            |           |
|---------|------------|-----------|
| -0.526  | -2.343     | 1.291     |
| -1.268  | -1.936     | -0.599    |
| -0.111  | -1.590     | 1.367     |
| -1.026  | -3.851     | 1.799     |
| -0.572  | -1.536     | 0.391     |
| 0.197   | -0.579     | 0.973     |
| -0.200  | -0.333     | -0.066    |
| 0.020   | -0.830     | 0.871     |
| -0.396  | -0.512     | -0.280    |
| -0.405  | -0.710     | -0.099    |
| 0.481   | -0.001     | 0.963     |
| 0.481   | -0.001     | 0.963     |
| 0.481   | -0.001     | 0.963     |
| 0.282   | -0.625     | 1.188     |
| 0.591   | 0.155      | 1.027     |
| -0.395  | -2.166     | 1.376     |
| 0.710   | -0.156     | 1.576     |
| -0.395  | -2.166     | 1.376     |
| -0.395  | -2.166     | 1.376     |
| -0.293  | -0.600     | 0.014     |
| -0.293  | -0.600     | 0.014     |
| 19.753  | -8525.420  | 8564.926  |
| -19.286 | -10811.767 | 10773.194 |
| -0.018  | -0.457     | 0.420     |
| -0.018  | -0.457     | 0.420     |
| -0.018  | -0.457     | 0.420     |
| -0.018  | -0.457     | 0.420     |
| 0.262   | -0.785     | 1.309     |
| 0.262   | -0.785     | 1.309     |
| 0.262   | -0.785     | 1.309     |
| 0.263   | -0.780     | 1.305     |

|         |            |           |
|---------|------------|-----------|
| -0.045  | -0.413     | 0.322     |
| 20.247  | -11262.797 | 11303.292 |
| 20.247  | -11262.797 | 11303.292 |
| 20.247  | -11262.797 | 11303.292 |
| 20.247  | -11262.797 | 11303.292 |
| 20.247  | -11262.797 | 11303.292 |
| -0.844  | -1.440     | -0.248    |
| 3.279   | -2.583     | 9.141     |
| 3.279   | -2.583     | 9.141     |
| 2.012   | -1.060     | 5.083     |
| -0.919  | -1.543     | -0.295    |
| -0.919  | -1.543     | -0.295    |
| -0.919  | -1.543     | -0.295    |
| 0.252   | -0.345     | 0.849     |
| 0.150   | -3.051     | 3.352     |
| -19.001 | -6161.770  | 6123.769  |
| 19.430  | -5344.678  | 5383.537  |
| 20.008  | -15650.315 | 15690.331 |
| 20.008  | -15650.315 | 15690.331 |
| -18.445 | -6562.226  | 6525.336  |
| -0.549  | -2.003     | 0.904     |
| -0.679  | -2.129     | 0.771     |
| -0.546  | -2.330     | 1.238     |
| 0.503   | -1.234     | 2.240     |
| -1.491  | -3.567     | 0.586     |
| -1.491  | -3.567     | 0.586     |
| -1.491  | -3.567     | 0.586     |
| 19.627  | -8671.290  | 8710.544  |
| 0.503   | -1.234     | 2.240     |
| -0.190  | -2.257     | 1.877     |
| -0.293  | -2.478     | 1.893     |

|         |            |           |
|---------|------------|-----------|
| -0.293  | -2.478     | 1.893     |
| -0.293  | -2.478     | 1.893     |
| 18.632  | -6525.978  | 6563.242  |
| 18.632  | -6525.978  | 6563.242  |
| 18.632  | -6525.978  | 6563.242  |
| -19.042 | -6542.468  | 6504.384  |
| -19.087 | -8439.227  | 8401.052  |
| -19.087 | -8439.227  | 8401.052  |
| -19.577 | -11440.632 | 11401.478 |
| -19.577 | -11440.632 | 11401.478 |
| -19.577 | -11440.632 | 11401.478 |
| -19.040 | -9440.250  | 9402.169  |
| -19.040 | -9440.250  | 9402.169  |
| -19.040 | -9440.250  | 9402.169  |
| 0.453   | -0.545     | 1.451     |
| 0.453   | -0.545     | 1.451     |
| 0.453   | -0.545     | 1.451     |
| 0.453   | -0.545     | 1.451     |
| 0.453   | -0.545     | 1.451     |
| 0.499   | -0.931     | 1.929     |
| 0.499   | -0.931     | 1.929     |
| 0.499   | -0.931     | 1.929     |
